# Supplementary material for: Integrating Machine Learning and Spatial Transcriptomics Uncovers Shared Immunomodulatory Deubiquitinases in MAFLD and HCC
Source: Research Square preprint supplement (doi:10.21203/rs.3.rs-6909459/v1), 2025-06-29
Supplement: Supplementary file 1 [file 1bf01a22c668d3f107cf1854.docx]

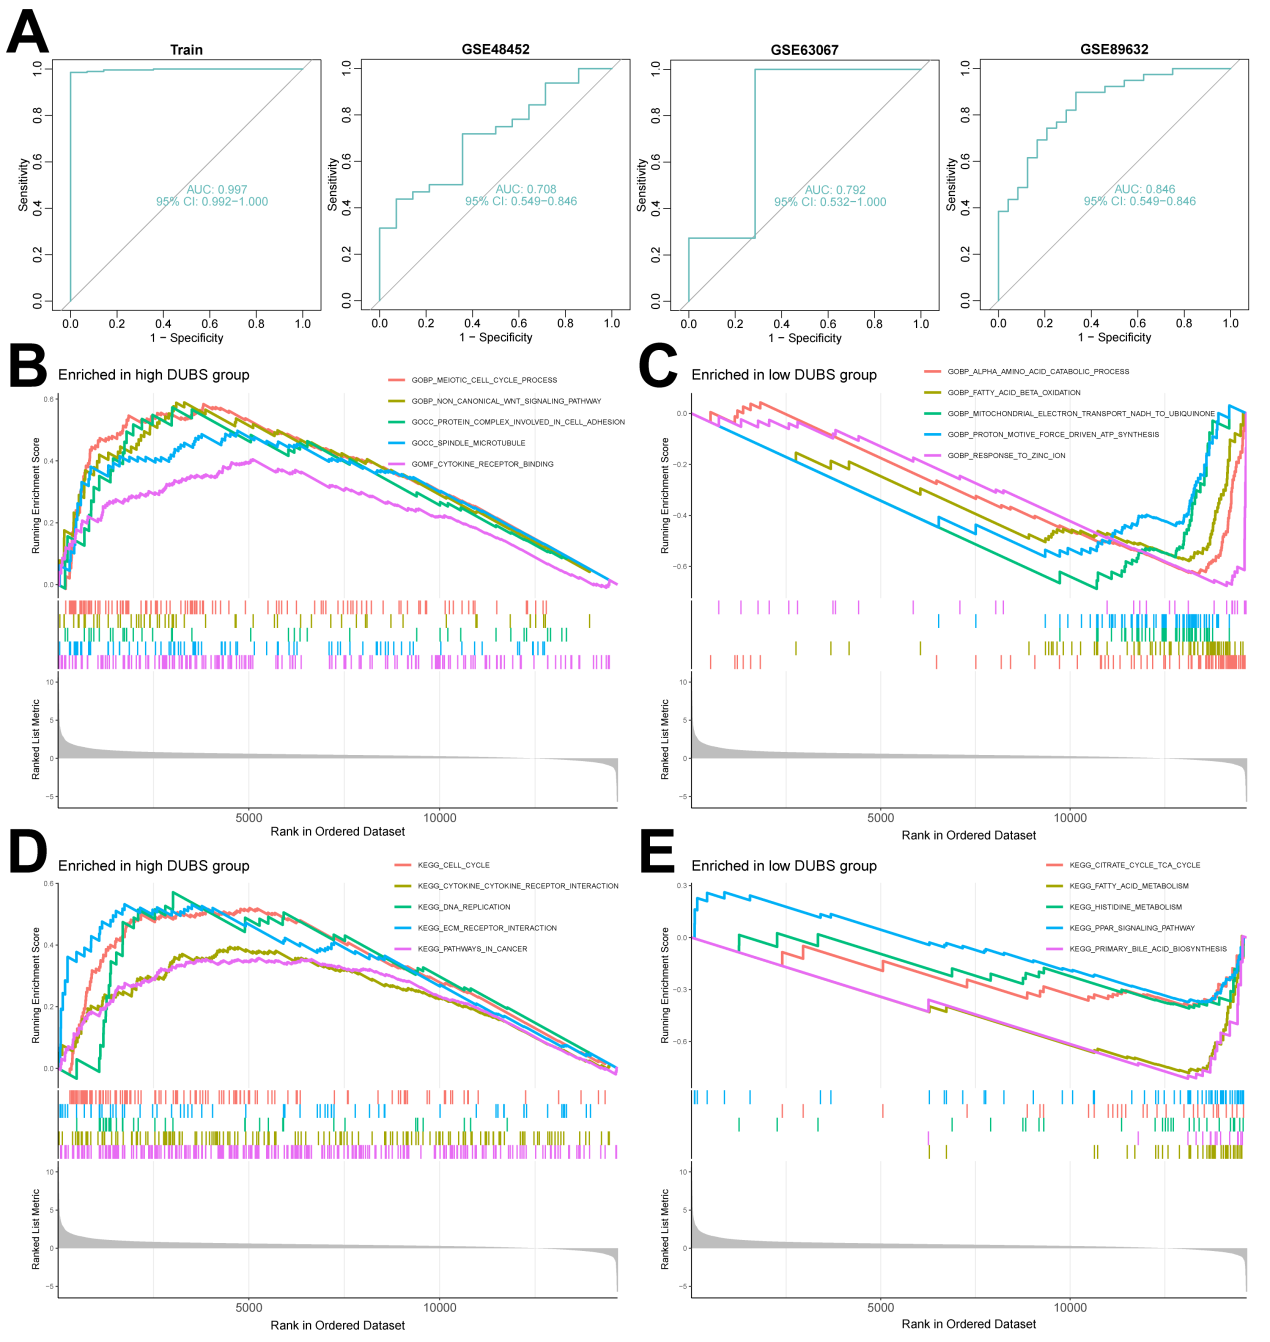


**Figure S1: Diagnostic performance evaluation and functional enrichment profiling.** (A) Diagnostic ROC trajectories of Lasso-LDA integration in each validation cohort.(B) GSEA results based on GO gene sets in the DUBS-high group.(C) GSEA results based on GO gene sets in the DUBS-low group.(D) GSEA results based on KEGG gene sets in the DUBS-high group.(E) GSEA results based on KEGG gene sets in the DUBS-low group.


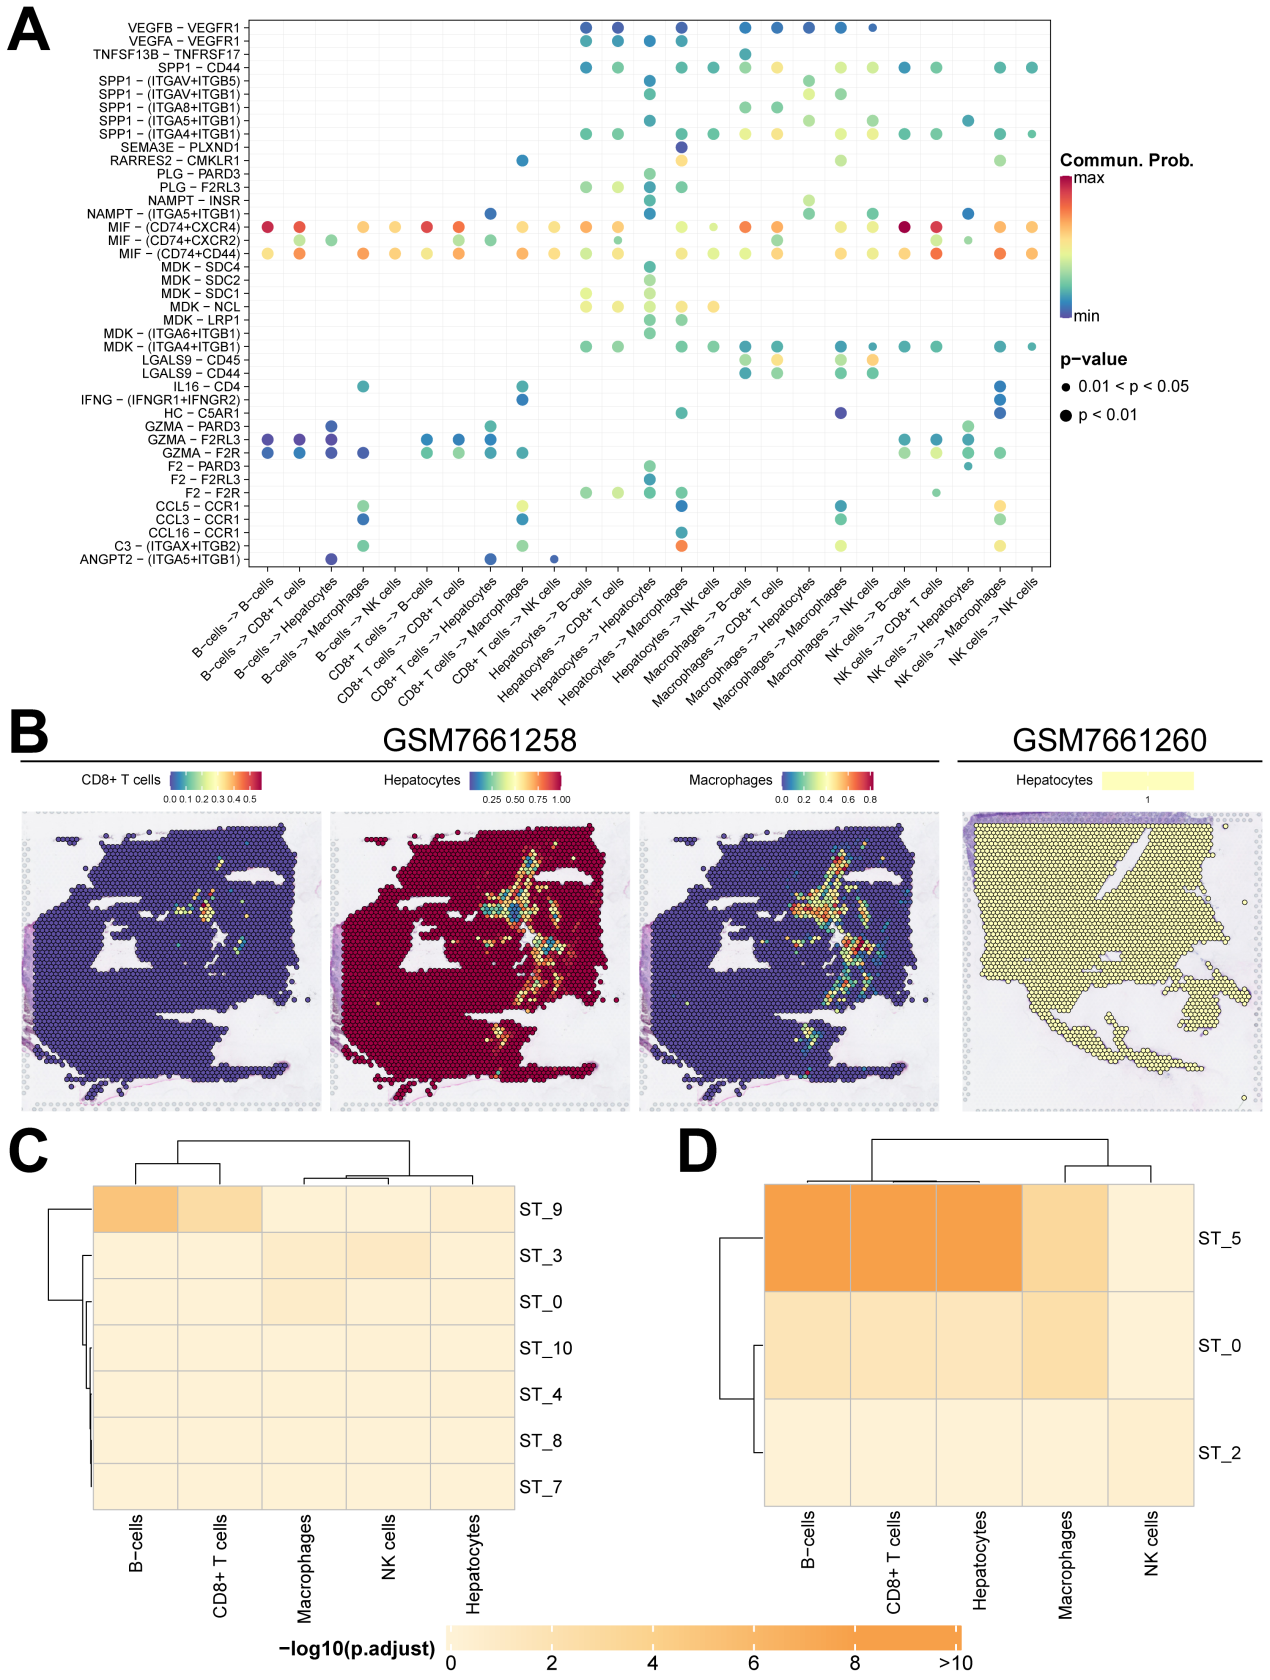


**Figure S2: Cell-cell communication network profiling and spatial immune contexture analysis.** (A) Bubble plot visualization of intercellular ligand-receptor interaction networks.(B) Spatially resolved immune cell infiltration quantification in responders versus non-responders to targeted-immunotherapy combination using transcriptome deconvolution.(C-D) Compartment-specific infiltration profiling of immune microenvironmental cells across spatial clusters.
