# Supplementary material for: Integrating Machine Learning and Spatial Transcriptomics Uncovers Shared Immunomodulatory Deubiquitinases in MAFLD and HCC
Source: Research Square preprint supplement (doi:10.21203/rs.3.rs-6909459/v1), 2025-06-29
Supplement: Supplementary file 2 [file 1d69264b8209ff895a736f57.xlsx]

## Sheet: Table S1
Table S1: Classical Tumor-associated Deubiquitinase Genes.
Gene Name	Family
USP1	USP
USP10	USP
USP11	USP
USP12	USP
USP13	USP
USP14	USP
USP15	USP
USP16	USP
USP17L1	USP
USP17L10	USP
USP17L11	USP
USP17L12	USP
USP17L13	USP
USP17L15	USP
USP17L17	USP
USP17L18	USP
USP17L19	USP
USP17L2	USP
USP17L20	USP
USP17L21	USP
USP17L22	USP
USP17L23	USP
USP17L24	USP
USP17L25	USP
USP17L26	USP
USP17L27	USP
USP17L28	USP
USP17L29	USP
USP17L3	USP
USP17L30	USP
USP17L4	USP
USP17L5	USP
USP17L7	USP
USP17L8	USP
USP18	USP
USP19	USP
USP2	USP
USP20	USP
USP21	USP
USP22	USP
USP24	USP
USP25	USP
USP26	USP
USP27X	USP
USP28	USP
USP29	USP
USP3	USP
USP30	USP
USP31	USP
USP32	USP
USP33	USP
USP34	USP
USP35	USP
USP36	USP
USP37	USP
USP38	USP
USP39	USP
USP4	USP
USP40	USP
USP42	USP
USP43	USP
USP44	USP
USP45	USP
USP46	USP
USP47	USP
USP48	USP
USP49	USP
USP5	USP
USP50	USP
USP51	USP
USP53	USP
USP54	USP
USP6	USP
USP7	USP
USP8	USP
USP9X	USP
USP9Y	USP
USPL1	USP
OTUD7A	OUT
OTUB1	OUT
YOD1	OUT
OTUD6B	OUT
OTUD5	OUT
OTUB2	OUT
OTUD4	OUT
OTUD7B	OUT
OTUD3	OUT
OTUD1	OUT
OTUD6A	OUT
OTULIN	OUT
TNFAIP3	OUT
OTULINL	OUT
MINDY1	MINDY
MINDY2	MINDY
MINDY3	MINDY
MINDY4	MINDY
UCHL1	UCH
UCHL3	UCH
UCHL5	UCH
UCHL2	UCH
RPN11	JAMM
RPN8	JAMM
STAMBP	JAMM
STAMBPL1	JAMM
BRCC3	JAMM
EIF3H	JAMM
MYSM1	JAMM
CSN5	JAMM
CSN6	JAMM
ABRAXAS2	JAMM
ABRAXAS	JAMM
EIF3F	JAMM
ZUP1	ZUP

## Sheet: Table S2
Table S2: All cohorts in this study
Cohorts ID	Type	Note
TCGA-LIHC	RNA-seq	HCC
ICGC-LIHC	RNA-seq	HCC
GSE116174	RNA-seq	HCC
GSE135251	RNA-seq	MAFLD
GSE130970	RNA-seq	MAFLD
GSE48452	RNA-seq	MAFLD
GSE63067	RNA-seq	MAFLD
GSE89632	RNA-seq	MAFLD
GSE91061	RNA-seq	ICB treatment
Liu et al.	RNA-seq	ICB treatment
GSE146115	scRNA-seq	HCC
GSE238264	Spatial Transcriptomics	HCC

## Sheet: Table S3
Table S3: Differential expression of deubiquitinase genes in hepatocellular carcinoma(HCC)
id	logFC	AveExpr	t	P.Value	adj.P.Val	B
COPS6	18.8936	32.7281	8.38695	7.53459e-16	9.90261e-15	25.1455
EIF3H	16.9767	26.8971	7.00339	9.89492e-12	4.33492e-11	15.84
USP5	10.907	21.1361	9.02329	6.4764e-18	1.48957e-16	29.8285
BAP1	9.07559	16.1851	10.182	6.37698e-22	5.86682e-20	38.9303
USP22	6.02677	9.42164	6.00202	4.19729e-09	1.13574e-08	9.93819
OTUB1	5.37904	10.6699	7.9058	2.34195e-14	1.65738e-13	21.7675
USP14	5.29391	9.01959	8.53129	2.61485e-16	4.00944e-15	26.1868
OTUD5	5.04404	15.5628	6.9249	1.63138e-11	6.52554e-11	15.3509
USP39	4.85784	8.22039	9.63241	5.52712e-20	1.69498e-18	34.5256
PSMD14	4.38998	7.16775	8.24214	2.15146e-15	2.19927e-14	24.1136
MINDY1	4.32872	7.65684	6.94072	1.47555e-11	6.17049e-11	15.4491
USP11	4.14287	7.89906	6.31095	7.0148e-10	2.18348e-09	11.6792
USP19	4.00893	9.27812	7.29706	1.46778e-12	7.16972e-12	17.7082
USP1	3.62826	6.0451	5.55003	5.0517e-08	1.22304e-07	7.52455
USP21	3.42615	4.29124	8.99392	8.10773e-18	1.49182e-16	29.6072
COPS5	3.39387	5.38565	9.79347	1.51833e-20	6.98433e-19	35.8006
USP7	3.37843	9.13706	7.13176	4.3278e-12	1.99079e-11	16.6493
EIF3F	3.35284	7.3423	6.80636	3.44357e-11	1.26723e-10	14.6206
UCHL5	3.23934	5.78261	7.46315	4.86167e-13	2.63102e-12	18.7912
PSMD7	2.6022	6.70079	5.43258	9.39727e-08	2.01058e-07	6.92401
TNFAIP3	2.45393	7.99068	2.31751	0.0209532	0.0275385	-4.64571
USP36	2.3187	4.08064	7.75131	6.84755e-14	4.49982e-13	20.7141
USP40	2.05869	4.33841	7.29573	1.4807e-12	7.16972e-12	17.6997
USP33	2.04149	4.67112	5.45559	8.32848e-08	1.86883e-07	7.04077
USP10	2.04119	8.85793	3.9398	9.53947e-05	0.000162524	0.297016
USP20	2.03372	4.64834	8.32138	1.21353e-15	1.39556e-14	24.6767
USP30	1.84474	4.51043	6.65928	8.58222e-11	3.03678e-10	13.7285
STAMBP	1.79519	3.71533	8.16816	3.65918e-15	3.36644e-14	23.5915
BRCC3	1.77513	4.31401	5.43569	9.24545e-08	2.01058e-07	6.93976
ABRAXAS2	1.65649	5.3112	6.20582	1.29972e-09	3.73669e-09	11.0786
USP16	1.65155	5.04456	5.25534	2.34926e-07	4.9121e-07	6.0389
USP24	1.60066	3.92405	5.50121	6.54718e-08	1.51126e-07	7.27357
OTUD7B	1.57289	3.18676	6.59295	1.28898e-10	4.39209e-10	13.3314
OTUD6B	1.50407	2.19437	8.15281	4.08397e-15	3.41569e-14	23.4835
USP4	1.39366	4.44311	5.09177	5.35295e-07	1.09438e-06	5.24493
USP35	1.27082	1.89455	5.84158	1.03333e-08	2.64073e-08	9.06302
USP48	1.25381	3.05482	6.27731	8.5528e-10	2.53825e-09	11.4861
USP9X	1.2465	8.79463	2.16186	0.0311899	0.040415	-4.98949
OTULIN	1.23568	3.28652	5.64755	2.99265e-08	7.44118e-08	8.03166
USP32	0.989324	3.50643	3.45728	0.000600989	0.000970018	-1.42766
ZUP1	0.963732	1.80086	6.84569	2.69053e-11	1.03137e-10	14.8618
USP28	0.910836	2.50339	4.67771	3.91077e-06	7.34268e-06	3.33497
USP3	0.877419	1.67531	7.60607	1.85146e-13	1.06459e-12	19.738
USP38	-0.840312	3.34827	-3.39594	0.000748659	0.00118753	-1.63172
YOD1	0.794449	1.67493	4.95185	1.06456e-06	2.12912e-06	4.58339
USP13	0.781122	2.14862	3.81979	0.000153598	0.000256928	-0.151601
USP27X	0.7755	1.34359	3.54686	0.000433506	0.000712188	-1.12344
USP25	0.656669	2.96762	3.11364	0.0019736	0.00292857	-2.52608
USP42	0.655469	1.4578	6.52289	1.97418e-10	6.4866e-10	12.9154
USP31	0.622449	1.20543	6.18454	1.47106e-09	4.10113e-09	10.9581
STAMBPL1	0.578572	0.742812	4.74175	2.90154e-06	5.56129e-06	3.6209
USP47	0.520624	2.79189	2.57204	0.0104507	0.0141392	-4.03341
USP46	0.490905	0.856083	6.30843	7.12005e-10	2.18348e-09	11.6647
USP54	0.48844	0.611023	4.04849	6.13208e-05	0.000108491	0.714428
USPL1	0.459152	2.26617	2.97747	0.00307361	0.00448845	-2.93103
OTUB2	0.449654	0.520959	7.66998	1.19717e-13	7.34267e-13	20.1658
MYSM1	0.427396	0.902751	3.96844	8.49898e-05	0.00014753	0.406
MINDY2	0.40594	1.20043	2.79569	0.00541509	0.00754831	-3.4445
USP34	0.403627	1.23316	2.81584	0.00509281	0.00720828	-3.38912
OTUD3	0.370256	0.522416	5.50053	6.57069e-08	1.51126e-07	7.27011
USP8	0.324783	1.19208	4.63444	4.77541e-06	8.78675e-06	3.14379
USP49	0.289893	0.354822	8.09994	5.95411e-15	4.56481e-14	23.113
OTULINL	0.264583	0.524894	2.47019	0.0138979	0.0185306	-4.28584
USP45	0.203109	0.556265	4.51324	8.28849e-06	1.49518e-05	2.61678
ABRAXAS1	0.195281	0.321635	5.93134	6.2572e-09	1.64475e-08	9.55017
UCHL3	0.187933	0.552659	2.62835	0.00889272	0.0122109	-3.88962
USP37	0.159889	0.389932	2.91152	0.00378718	0.00544408	-3.1209
MINDY4	0.0585444	0.0844646	3.34497	0.000896393	0.00137447	-1.79864
OTUD7A	0.0421799	0.0771019	4.79183	2.29217e-06	4.48681e-06	3.84693
USP50	0.0287303	0.0667283	3.36542	0.000834109	0.00130064	-1.73193
USP6	0.0158741	0.0321481	3.18653	0.00154678	0.00233285	-2.30224

## Sheet: Table S4
Table S4: Differential expression of deubiquitinase genes in MAFLD
id	logFC	AveExpr	t	P.Value	adj.P.Val	B
PSMD7	8.51051	26.8205	5.51585	9.93913e-08	1.20512e-06	7.22798
USP22	5.82139	12.5415	6.88855	6.15741e-11	5.97269e-09	14.3878
USP5	4.87279	9.825	6.69527	1.85467e-10	5.99676e-09	13.3151
OTUB1	2.79611	8.64446	4.53605	9.53534e-06	7.11483e-05	2.8532
BAP1	2.11768	9.23734	3.40486	0.000790066	0.00333202	-1.30147
USP19	1.89025	4.49774	6.53644	4.52383e-10	1.09703e-08	12.4485
USP18	1.48848	3.82387	3.51158	0.000542978	0.00277204	-0.953832
EIF3F	-1.33888	7.44391	-2.51286	0.0127113	0.0342498	-3.82143
USP4	1.25065	4.35475	5.60903	6.23272e-08	9.8008e-07	7.67805
USP7	1.19248	6.45988	3.70519	0.000268803	0.00162962	-0.298891
MINDY1	1.02574	3.03725	3.45119	0.00067209	0.00323792	-1.15172
OTUD1	-0.992408	1.17764	-6.76384	1.25701e-10	5.99676e-09	13.6934
OTUD5	0.878292	3.34493	3.26318	0.00128193	0.00497388	-1.74807
MINDY3	-0.839902	1.84518	-4.3247	2.33968e-05	0.000162106	2.00043
USP11	0.784111	2.69551	3.57312	0.000435615	0.00248557	-0.749041
USP21	0.762144	2.67526	2.85611	0.00471019	0.0157548	-2.9348
USP20	0.717281	2.09627	3.09695	0.00221641	0.00826891	-2.25012
USP24	0.695374	3.27768	3.43917	0.000700993	0.00323792	-1.19073
USP39	0.694625	5.21867	2.59122	0.0102202	0.0283245	-3.62838
USP2	0.601659	1.24532	2.7621	0.00624143	0.0195296	-3.18814
USP32	0.599527	2.36157	2.77256	0.00605117	0.0195296	-3.16035
ABRAXAS1	-0.538747	1.6715	-3.54044	0.000489859	0.0026398	-0.858185
USP28	0.512393	2.16487	2.90455	0.00406278	0.0140746	-2.80118
OTULIN	0.474222	1.81447	5.26819	3.34533e-07	2.94997e-06	6.05947
OTUD7B	0.446988	1.24028	6.11551	4.49833e-09	8.72675e-08	10.2199
USP36	0.435417	1.74561	2.67069	0.00814982	0.0239555	-3.42691
MINDY2	-0.370403	0.530345	-5.3902	1.84884e-07	1.79337e-06	6.63003
USP13	-0.370403	1.07087	-5.05199	9.34225e-07	7.55165e-06	5.07324
TNFAIP3	-0.334128	1.10619	-2.69839	0.00752226	0.0228018	-3.35534
USP50	-0.229175	0.358975	-5.44453	1.41538e-07	1.52546e-06	6.88732
USP31	-0.214365	0.925379	-2.60073	0.0099497	0.0283245	-3.60457
USP46	0.195224	0.560666	3.37127	0.000887406	0.0035866	-1.40889
USP54	-0.186023	0.243771	-3.40879	0.000779357	0.00333202	-1.28884
OTUB2	0.116082	0.255129	4.0474	7.23079e-05	0.000467591	0.933589
USP51	-0.0763162	0.298007	-2.41912	0.0163923	0.0429745	-4.04504
USP44	-0.0290078	0.0183662	-5.58389	7.07275e-08	9.8008e-07	7.55607
USP6	-0.0210295	0.032653	-3.01005	0.00292499	0.0105083	-2.50303

## Sheet: Table S5
Table S5: The intersection genes of MAFLD and HCC
OTUD7B
USP6
USP5
USP4
USP13
USP7
USP31
TNFAIP3
USP22
EIF3F
USP24
OTULIN
OTUD5
OTUB1
USP46
PSMD7
MINDY2
BAP1
MINDY1
USP50
ABRAXAS1
USP28
USP11
USP20
USP54
OTUB2
USP19
USP36
USP21
USP32
USP39

## Sheet: Table S6
Table S6: Genes obtained based on lasso+LDA algorithm
Algorithm	Genes
Lasso+LDA	BAP1
Lasso+LDA	EIF3F
Lasso+LDA	OTUB2
Lasso+LDA	OTUD7B
Lasso+LDA	PSMD7
Lasso+LDA	USP19
Lasso+LDA	USP20
Lasso+LDA	USP21
Lasso+LDA	USP28
Lasso+LDA	USP31
Lasso+LDA	USP32
Lasso+LDA	USP39
Lasso+LDA	USP4
Lasso+LDA	USP5
Lasso+LDA	USP7

## Sheet: Table S7
Table S7: The clinical information of 3 HCC cohorts
TCGA-LIHC
Covariates	Cluster	Total	High DUBS	Low DUBS
Age	<=60	180	96	81
Age	>60	196	89	104
Gender	FEMALE	122	71	50
Gender	MALE	254	114	135
Grade	G1	55	18	36
Grade	G2	180	79	98
Grade	G3	124	74	47
Grade	G4	13	10	2
Stage	Stage I	175	69	102
Stage	Stage II	87	50	35
Stage	Stage III	86	51	34
Stage	Stage IV	5	3	2
T	T1	185	73	108
T	T2	95	57	36
T	T3	81	46	34
T	T4	13	9	4
N	N0	257	129	123
N	N1	4	3	1
M	M0	272	134	132
M	M1	4	3	1
ICGC-LIHC
Covariates	Cluster	Total	High DUBS	Low DUBS
Age	<=60	50	27	23
Age	>60	182	85	97
Stage	Stage I	36	14	22
Stage	Stage II	106	42	64
Stage	Stage III	71	40	31
Stage	Stage IV	19	16	3
GSE116174
Covariates	Cluster	Total	High DUBS	Low DUBS
Age	<=60	46	28	22
Age	>60	18	8	10
Gender	FEMALE	6	4	2
Gender	MALE	58	32	26
Stage	Stage I	8	2	6
Stage	Stage II	45	26	19
Stage	Stage III	11	8	3

## Sheet: Table S8
Table S8: Immune Subtype in Pan-cancer
sample	Subtype_Immune_Model_Based
TCGA-A5-A0GI-01	Wound Healing (Immune C1)
TCGA-S9-A7J2-01	Immunologically Quiet (Immune C5)
TCGA-EK-A2RE-01	IFN-gamma Dominant (Immune C2)
TCGA-D5-5538-01	IFN-gamma Dominant (Immune C2)
TCGA-F4-6854-01	Wound Healing (Immune C1)
TCGA-AX-A2H7-01	Wound Healing (Immune C1)
TCGA-C8-A1HL-01	Wound Healing (Immune C1)
TCGA-EW-A2FS-01	IFN-gamma Dominant (Immune C2)
TCGA-IR-A3L7-01	Wound Healing (Immune C1)
TCGA-05-4420-01	Wound Healing (Immune C1)
TCGA-2G-AAFZ-01	Wound Healing (Immune C1)
TCGA-DX-A3U8-01	Lymphocyte Depleted (Immune C4)
TCGA-GL-8500-01	Lymphocyte Depleted (Immune C4)
TCGA-CC-A3MA-01	Wound Healing (Immune C1)
TCGA-IN-7808-01	IFN-gamma Dominant (Immune C2)
TCGA-CC-A9FW-01	Inflammatory (Immune C3)
TCGA-AA-3982-01	IFN-gamma Dominant (Immune C2)
TCGA-B9-A8YH-01	Inflammatory (Immune C3)
TCGA-E1-A7YI-01	Lymphocyte Depleted (Immune C4)
TCGA-B5-A1MY-01	IFN-gamma Dominant (Immune C2)
TCGA-CH-5751-01	IFN-gamma Dominant (Immune C2)
TCGA-A2-A3XX-01	Wound Healing (Immune C1)
TCGA-DQ-5624-01	IFN-gamma Dominant (Immune C2)
TCGA-KK-A7B3-01	Inflammatory (Immune C3)
TCGA-HG-A2PA-01	IFN-gamma Dominant (Immune C2)
TCGA-06-5412-01	Lymphocyte Depleted (Immune C4)
TCGA-BP-4765-01	Inflammatory (Immune C3)
TCGA-EJ-8468-01	Inflammatory (Immune C3)
TCGA-CZ-5459-01	Inflammatory (Immune C3)
TCGA-KK-A8I5-01	Inflammatory (Immune C3)
TCGA-KP-A3W3-01	IFN-gamma Dominant (Immune C2)
TCGA-IQ-A61O-01	Wound Healing (Immune C1)
TCGA-BH-A18K-01	Wound Healing (Immune C1)
TCGA-DD-AAW0-01	Inflammatory (Immune C3)
TCGA-AG-A011-01	Wound Healing (Immune C1)
TCGA-AA-3511-01	IFN-gamma Dominant (Immune C2)
TCGA-Z7-A8R5-01	Wound Healing (Immune C1)
TCGA-39-5031-01	Wound Healing (Immune C1)
TCGA-ZG-A8QW-01	Inflammatory (Immune C3)
TCGA-DU-7302-01	Immunologically Quiet (Immune C5)
TCGA-DJ-A3UX-01	Inflammatory (Immune C3)
TCGA-ZN-A9VQ-01	Wound Healing (Immune C1)
TCGA-EI-6512-01	Wound Healing (Immune C1)
TCGA-J4-A83K-01	Inflammatory (Immune C3)
TCGA-2H-A9GF-01	Wound Healing (Immune C1)
TCGA-HZ-7922-01	TGF-beta Dominant (Immune C6)
TCGA-BJ-A28S-01	Inflammatory (Immune C3)
TCGA-AG-3578-01	Wound Healing (Immune C1)
TCGA-QG-A5YX-01	Wound Healing (Immune C1)
TCGA-AA-3553-01	Wound Healing (Immune C1)
TCGA-ZG-A9MC-01	IFN-gamma Dominant (Immune C2)
TCGA-FE-A238-01	IFN-gamma Dominant (Immune C2)
TCGA-DU-A7TI-01	Lymphocyte Depleted (Immune C4)
TCGA-BR-8372-01	IFN-gamma Dominant (Immune C2)
TCGA-HC-7742-01	Inflammatory (Immune C3)
TCGA-64-1679-01	Wound Healing (Immune C1)
TCGA-CV-5976-01	IFN-gamma Dominant (Immune C2)
TCGA-25-1315-01	IFN-gamma Dominant (Immune C2)
TCGA-R6-A8WC-01	Wound Healing (Immune C1)
TCGA-GE-A2C6-01	Inflammatory (Immune C3)
TCGA-CV-6948-01	Wound Healing (Immune C1)
TCGA-D1-A1NW-01	IFN-gamma Dominant (Immune C2)
TCGA-CJ-6028-01	Inflammatory (Immune C3)
TCGA-24-2297-01	IFN-gamma Dominant (Immune C2)
TCGA-CZ-5456-01	Inflammatory (Immune C3)
TCGA-AA-3693-01	Wound Healing (Immune C1)
TCGA-EM-A22Q-01	Inflammatory (Immune C3)
TCGA-49-6744-01	IFN-gamma Dominant (Immune C2)
TCGA-L5-A4ON-01	Lymphocyte Depleted (Immune C4)
TCGA-IB-7891-01	TGF-beta Dominant (Immune C6)
TCGA-ZN-A9VU-01	IFN-gamma Dominant (Immune C2)
TCGA-Q3-A5QY-01	Inflammatory (Immune C3)
TCGA-66-2794-01	IFN-gamma Dominant (Immune C2)
TCGA-AJ-A3BI-01	IFN-gamma Dominant (Immune C2)
TCGA-W2-A7UY-01	Inflammatory (Immune C3)
TCGA-E3-A3E2-01	Inflammatory (Immune C3)
TCGA-FB-A545-01	IFN-gamma Dominant (Immune C2)
TCGA-G4-6320-01	Wound Healing (Immune C1)
TCGA-EB-A41A-01	Wound Healing (Immune C1)
TCGA-55-6982-01	IFN-gamma Dominant (Immune C2)
TCGA-RC-A7SH-01	Lymphocyte Depleted (Immune C4)
TCGA-CD-8528-01	Lymphocyte Depleted (Immune C4)
TCGA-CM-6164-01	Wound Healing (Immune C1)
TCGA-C5-A1ME-01	Wound Healing (Immune C1)
TCGA-09-0369-01	Wound Healing (Immune C1)
TCGA-E2-A2P6-01	Inflammatory (Immune C3)
TCGA-VD-A8KF-01	Lymphocyte Depleted (Immune C4)
TCGA-AX-A0IZ-01	IFN-gamma Dominant (Immune C2)
TCGA-EL-A4JZ-01	Inflammatory (Immune C3)
TCGA-M7-A722-01	Lymphocyte Depleted (Immune C4)
TCGA-CV-A6K0-01	IFN-gamma Dominant (Immune C2)
TCGA-13-1512-01	IFN-gamma Dominant (Immune C2)
TCGA-BH-A1EN-01	Lymphocyte Depleted (Immune C4)
TCGA-D1-A17D-01	Inflammatory (Immune C3)
TCGA-AO-A1KT-01	Wound Healing (Immune C1)
TCGA-N9-A4Q1-01	Wound Healing (Immune C1)
TCGA-12-5299-01	Lymphocyte Depleted (Immune C4)
TCGA-EM-A3AN-01	Inflammatory (Immune C3)
TCGA-29-1761-01	IFN-gamma Dominant (Immune C2)
TCGA-BJ-A0ZJ-01	Inflammatory (Immune C3)
TCGA-P5-A5EX-01	Inflammatory (Immune C3)
TCGA-DJ-A4V2-01	Inflammatory (Immune C3)
TCGA-HT-8563-01	Lymphocyte Depleted (Immune C4)
TCGA-J8-A3O2-01	Inflammatory (Immune C3)
TCGA-E9-A3HO-01	IFN-gamma Dominant (Immune C2)
TCGA-AX-A1CA-01	IFN-gamma Dominant (Immune C2)
TCGA-A6-A567-01	Wound Healing (Immune C1)
TCGA-58-A46N-01	Wound Healing (Immune C1)
TCGA-B5-A1MR-01	IFN-gamma Dominant (Immune C2)
TCGA-A3-3383-01	IFN-gamma Dominant (Immune C2)
TCGA-NJ-A4YI-01	Inflammatory (Immune C3)
TCGA-D8-A1XJ-01	Wound Healing (Immune C1)
TCGA-VT-A80J-01	IFN-gamma Dominant (Immune C2)
TCGA-Q1-A73Q-01	IFN-gamma Dominant (Immune C2)
TCGA-AG-3587-01	IFN-gamma Dominant (Immune C2)
TCGA-BQ-5880-01	Inflammatory (Immune C3)
TCGA-75-7027-01	Wound Healing (Immune C1)
TCGA-BA-6870-01	IFN-gamma Dominant (Immune C2)
TCGA-73-4666-01	IFN-gamma Dominant (Immune C2)
TCGA-MV-A51V-01	Wound Healing (Immune C1)
TCGA-77-A5G6-01	Wound Healing (Immune C1)
TCGA-5P-A9K4-01	Inflammatory (Immune C3)
TCGA-VD-A8KE-01	Lymphocyte Depleted (Immune C4)
TCGA-56-A4BX-01	Wound Healing (Immune C1)
TCGA-E9-A3QA-01	IFN-gamma Dominant (Immune C2)
TCGA-BR-A4J9-01	Inflammatory (Immune C3)
TCGA-CV-6955-01	IFN-gamma Dominant (Immune C2)
TCGA-P3-A5Q6-01	Wound Healing (Immune C1)
TCGA-FG-A60K-01	Immunologically Quiet (Immune C5)
TCGA-D7-A4Z0-01	Inflammatory (Immune C3)
TCGA-QK-A64Z-01	IFN-gamma Dominant (Immune C2)
TCGA-2J-AABI-01	Wound Healing (Immune C1)
TCGA-AC-A2FK-01	Inflammatory (Immune C3)
TCGA-VP-A879-01	Inflammatory (Immune C3)
TCGA-29-A5NZ-01	Wound Healing (Immune C1)
TCGA-B5-A1MV-01	Wound Healing (Immune C1)
TCGA-DV-A4W0-01	Inflammatory (Immune C3)
TCGA-37-4129-01	Lymphocyte Depleted (Immune C4)
TCGA-DD-AAVZ-01	Lymphocyte Depleted (Immune C4)
TCGA-D5-6534-01	TGF-beta Dominant (Immune C6)
TCGA-DJ-A13R-01	Inflammatory (Immune C3)
TCGA-E9-A1R4-01	IFN-gamma Dominant (Immune C2)
TCGA-3U-A98F-01	Lymphocyte Depleted (Immune C4)
TCGA-77-8145-01	IFN-gamma Dominant (Immune C2)
TCGA-LL-A740-01	Wound Healing (Immune C1)
TCGA-F5-6863-01	Wound Healing (Immune C1)
TCGA-06-2565-01	Lymphocyte Depleted (Immune C4)
TCGA-33-AASD-01	Wound Healing (Immune C1)
TCGA-ET-A3BS-01	Inflammatory (Immune C3)
TCGA-DM-A1D4-01	Wound Healing (Immune C1)
TCGA-22-5478-01	Wound Healing (Immune C1)
TCGA-MN-A4N1-01	Wound Healing (Immune C1)
TCGA-LN-A4A8-01	IFN-gamma Dominant (Immune C2)
TCGA-55-7911-01	IFN-gamma Dominant (Immune C2)
TCGA-EY-A1GC-01	IFN-gamma Dominant (Immune C2)
TCGA-ED-A627-01	Inflammatory (Immune C3)
TCGA-N6-A4VC-01	Wound Healing (Immune C1)
TCGA-16-0846-01	Lymphocyte Depleted (Immune C4)
TCGA-C8-A3M8-01	Wound Healing (Immune C1)
TCGA-BH-A0BM-01	Inflammatory (Immune C3)
TCGA-DM-A0X9-01	Wound Healing (Immune C1)
TCGA-AY-A69D-01	Wound Healing (Immune C1)
TCGA-AN-A0XW-01	Wound Healing (Immune C1)
TCGA-55-A4DG-01	Inflammatory (Immune C3)
TCGA-RW-A684-01	Lymphocyte Depleted (Immune C4)
TCGA-XD-AAUL-01	Wound Healing (Immune C1)
TCGA-AA-3667-01	Wound Healing (Immune C1)
TCGA-ET-A2N4-01	Inflammatory (Immune C3)
TCGA-58-A46J-01	IFN-gamma Dominant (Immune C2)
TCGA-24-1551-01	IFN-gamma Dominant (Immune C2)
TCGA-06-2561-01	Lymphocyte Depleted (Immune C4)
TCGA-WC-A88A-01	Lymphocyte Depleted (Immune C4)
TCGA-DD-AAVV-01	Inflammatory (Immune C3)
TCGA-ZJ-A8QQ-01	IFN-gamma Dominant (Immune C2)
TCGA-37-4133-01	IFN-gamma Dominant (Immune C2)
TCGA-77-8146-01	Wound Healing (Immune C1)
TCGA-2G-AAHN-01	IFN-gamma Dominant (Immune C2)
TCGA-L9-A5IP-01	Wound Healing (Immune C1)
TCGA-CJ-5672-01	Inflammatory (Immune C3)
TCGA-73-4662-01	Inflammatory (Immune C3)
TCGA-3U-A98I-01	TGF-beta Dominant (Immune C6)
TCGA-CQ-5327-01	IFN-gamma Dominant (Immune C2)
TCGA-FI-A2F4-01	IFN-gamma Dominant (Immune C2)
TCGA-E2-A1LL-01	Wound Healing (Immune C1)
TCGA-FD-A3SR-01	IFN-gamma Dominant (Immune C2)
TCGA-KK-A8II-01	Lymphocyte Depleted (Immune C4)
TCGA-BH-A28O-01	Inflammatory (Immune C3)
TCGA-XV-AAZW-01	Wound Healing (Immune C1)
TCGA-BJ-A0Z2-01	Inflammatory (Immune C3)
TCGA-DK-A6B0-01	Lymphocyte Depleted (Immune C4)
TCGA-97-7553-01	Inflammatory (Immune C3)
TCGA-ET-A2N0-01	Inflammatory (Immune C3)
TCGA-YB-A89D-01	Wound Healing (Immune C1)
TCGA-CH-5752-01	Inflammatory (Immune C3)
TCGA-77-7142-01	IFN-gamma Dominant (Immune C2)
TCGA-CR-7374-01	IFN-gamma Dominant (Immune C2)
TCGA-KS-A4I1-01	Inflammatory (Immune C3)
TCGA-60-2719-01	IFN-gamma Dominant (Immune C2)
TCGA-VR-A8Q7-01	Wound Healing (Immune C1)
TCGA-A7-A4SC-01	Inflammatory (Immune C3)
TCGA-YU-A90Y-01	IFN-gamma Dominant (Immune C2)
TCGA-FD-A5BS-01	IFN-gamma Dominant (Immune C2)
TCGA-IG-A3Y9-01	IFN-gamma Dominant (Immune C2)
TCGA-VR-A8EY-01	Wound Healing (Immune C1)
TCGA-J7-6720-01	Inflammatory (Immune C3)
TCGA-E9-A24A-01	Lymphocyte Depleted (Immune C4)
TCGA-49-AARE-01	Wound Healing (Immune C1)
TCGA-BC-4073-01	IFN-gamma Dominant (Immune C2)
TCGA-A6-2671-01	IFN-gamma Dominant (Immune C2)
TCGA-DK-A1AD-01	IFN-gamma Dominant (Immune C2)
TCGA-B6-A400-01	IFN-gamma Dominant (Immune C2)
TCGA-EM-A2OW-01	Inflammatory (Immune C3)
TCGA-XF-AAMQ-01	IFN-gamma Dominant (Immune C2)
TCGA-BB-A5HY-01	IFN-gamma Dominant (Immune C2)
TCGA-AG-3742-01	Wound Healing (Immune C1)
TCGA-WB-A816-01	Inflammatory (Immune C3)
TCGA-EA-A410-01	Wound Healing (Immune C1)
TCGA-CN-4722-01	Wound Healing (Immune C1)
TCGA-AN-A041-01	Wound Healing (Immune C1)
TCGA-13-0899-01	Wound Healing (Immune C1)
TCGA-AY-A8YK-01	Wound Healing (Immune C1)
TCGA-QA-A7B7-01	Lymphocyte Depleted (Immune C4)
TCGA-A5-AB3J-01	Inflammatory (Immune C3)
TCGA-50-8460-01	Inflammatory (Immune C3)
TCGA-PG-A917-01	IFN-gamma Dominant (Immune C2)
TCGA-IB-7889-01	TGF-beta Dominant (Immune C6)
TCGA-EM-A3SY-01	Lymphocyte Depleted (Immune C4)
TCGA-ZG-A9L1-01	Inflammatory (Immune C3)
TCGA-CN-5361-01	IFN-gamma Dominant (Immune C2)
TCGA-EX-A3L1-01	Wound Healing (Immune C1)
TCGA-50-5933-01	TGF-beta Dominant (Immune C6)
TCGA-EM-A3O7-01	Inflammatory (Immune C3)
TCGA-IE-A4EH-01	Wound Healing (Immune C1)
TCGA-A2-A04Y-01	IFN-gamma Dominant (Immune C2)
TCGA-43-3394-01	Wound Healing (Immune C1)
TCGA-ZF-AA4T-01	IFN-gamma Dominant (Immune C2)
TCGA-MQ-A6BQ-01	Lymphocyte Depleted (Immune C4)
TCGA-E2-A1LH-01	IFN-gamma Dominant (Immune C2)
TCGA-ET-A39P-01	Inflammatory (Immune C3)
TCGA-78-7155-01	Wound Healing (Immune C1)
TCGA-2G-AAM4-01	Wound Healing (Immune C1)
TCGA-AG-3727-01	Wound Healing (Immune C1)
TCGA-E7-A3X6-01	IFN-gamma Dominant (Immune C2)
TCGA-5M-AAT4-01	Wound Healing (Immune C1)
TCGA-24-1474-01	Lymphocyte Depleted (Immune C4)
TCGA-3H-AB3U-01	Wound Healing (Immune C1)
TCGA-CM-6167-01	Wound Healing (Immune C1)
TCGA-IZ-8196-01	Inflammatory (Immune C3)
TCGA-CR-7370-01	Wound Healing (Immune C1)
TCGA-BQ-5888-01	Inflammatory (Immune C3)
TCGA-B6-A0RH-01	IFN-gamma Dominant (Immune C2)
TCGA-EL-A3ZG-01	Inflammatory (Immune C3)
TCGA-EL-A3CR-01	Inflammatory (Immune C3)
TCGA-AA-3520-01	Wound Healing (Immune C1)
TCGA-A8-A07W-01	Wound Healing (Immune C1)
TCGA-QR-A6GY-01	Lymphocyte Depleted (Immune C4)
TCGA-VD-A8KA-01	Lymphocyte Depleted (Immune C4)
TCGA-YL-A8HJ-01	Inflammatory (Immune C3)
TCGA-64-1677-01	IFN-gamma Dominant (Immune C2)
TCGA-AU-6004-01	IFN-gamma Dominant (Immune C2)
TCGA-GU-A762-01	IFN-gamma Dominant (Immune C2)
TCGA-2Z-A9JK-01	Inflammatory (Immune C3)
TCGA-CS-5397-01	Lymphocyte Depleted (Immune C4)
TCGA-AX-A3G8-01	Wound Healing (Immune C1)
TCGA-B5-A11Q-01	Inflammatory (Immune C3)
TCGA-AA-3812-01	Inflammatory (Immune C3)
TCGA-AR-A1AS-01	Lymphocyte Depleted (Immune C4)
TCGA-CZ-4860-01	Lymphocyte Depleted (Immune C4)
TCGA-DD-AACA-01	Inflammatory (Immune C3)
TCGA-09-2048-01	Wound Healing (Immune C1)
TCGA-HU-A4GQ-01	IFN-gamma Dominant (Immune C2)
TCGA-E1-5322-01	Immunologically Quiet (Immune C5)
TCGA-73-4670-01	Wound Healing (Immune C1)
TCGA-ZG-A9L5-01	Inflammatory (Immune C3)
TCGA-CN-5365-01	IFN-gamma Dominant (Immune C2)
TCGA-MT-A7BN-01	Wound Healing (Immune C1)
TCGA-BR-4371-01	IFN-gamma Dominant (Immune C2)
TCGA-B0-5700-01	Inflammatory (Immune C3)
TCGA-97-7552-01	Inflammatory (Immune C3)
TCGA-BF-A5ER-01	Lymphocyte Depleted (Immune C4)
TCGA-JW-A5VI-01	IFN-gamma Dominant (Immune C2)
TCGA-XK-AAJT-01	Lymphocyte Depleted (Immune C4)
TCGA-56-A4BW-01	IFN-gamma Dominant (Immune C2)
TCGA-56-8308-01	Wound Healing (Immune C1)
TCGA-D1-A102-01	Wound Healing (Immune C1)
TCGA-CV-6956-01	IFN-gamma Dominant (Immune C2)
TCGA-AA-3854-01	Wound Healing (Immune C1)
TCGA-AP-A056-01	Wound Healing (Immune C1)
TCGA-DQ-5631-01	Wound Healing (Immune C1)
TCGA-85-8353-01	Wound Healing (Immune C1)
TCGA-36-1580-01	Wound Healing (Immune C1)
TCGA-OL-A66O-01	IFN-gamma Dominant (Immune C2)
TCGA-HP-A5N0-01	Inflammatory (Immune C3)
TCGA-CR-7369-01	IFN-gamma Dominant (Immune C2)
TCGA-55-A48Z-01	Wound Healing (Immune C1)
TCGA-AP-A1E3-01	Wound Healing (Immune C1)
TCGA-SC-A6LP-01	Wound Healing (Immune C1)
TCGA-HT-8558-01	Immunologically Quiet (Immune C5)
TCGA-FD-A43S-01	Inflammatory (Immune C3)
TCGA-5B-A90C-01	IFN-gamma Dominant (Immune C2)
TCGA-EW-A1P0-01	Lymphocyte Depleted (Immune C4)
TCGA-A5-A0GX-01	Inflammatory (Immune C3)
TCGA-QK-A6IG-01	IFN-gamma Dominant (Immune C2)
TCGA-22-4604-01	Wound Healing (Immune C1)
TCGA-BT-A42F-01	IFN-gamma Dominant (Immune C2)
TCGA-61-1900-01	Wound Healing (Immune C1)
TCGA-Y8-A894-01	Inflammatory (Immune C3)
TCGA-S9-A6U8-01	Immunologically Quiet (Immune C5)
TCGA-DC-5337-01	Wound Healing (Immune C1)
TCGA-CV-7261-01	Wound Healing (Immune C1)
TCGA-DJ-A3V7-01	Inflammatory (Immune C3)
TCGA-KL-8345-01	Immunologically Quiet (Immune C5)
TCGA-BP-4998-01	Inflammatory (Immune C3)
TCGA-ZH-A8Y5-01	Inflammatory (Immune C3)
TCGA-EL-A3T9-01	TGF-beta Dominant (Immune C6)
TCGA-OR-A5J2-01	Inflammatory (Immune C3)
TCGA-BR-8363-01	IFN-gamma Dominant (Immune C2)
TCGA-T2-A6X2-01	IFN-gamma Dominant (Immune C2)
TCGA-CR-6492-01	IFN-gamma Dominant (Immune C2)
TCGA-G2-A3IB-01	IFN-gamma Dominant (Immune C2)
TCGA-EW-A1PC-01	IFN-gamma Dominant (Immune C2)
TCGA-BG-A0M3-01	Wound Healing (Immune C1)
TCGA-GM-A2DA-01	Wound Healing (Immune C1)
TCGA-CJ-5675-01	Inflammatory (Immune C3)
TCGA-CU-A3KJ-01	Wound Healing (Immune C1)
TCGA-A7-A0CH-01	Wound Healing (Immune C1)
TCGA-CM-6168-01	Wound Healing (Immune C1)
TCGA-E9-A2JS-01	IFN-gamma Dominant (Immune C2)
TCGA-EA-A1QT-01	IFN-gamma Dominant (Immune C2)
TCGA-L6-A4EP-01	Inflammatory (Immune C3)
TCGA-W4-A7U4-01	IFN-gamma Dominant (Immune C2)
TCGA-4E-A92E-01	IFN-gamma Dominant (Immune C2)
TCGA-HQ-A5ND-01	IFN-gamma Dominant (Immune C2)
TCGA-EL-A3ZL-01	Inflammatory (Immune C3)
TCGA-XY-A8S3-01	IFN-gamma Dominant (Immune C2)
TCGA-75-7031-01	IFN-gamma Dominant (Immune C2)
TCGA-EW-A6SB-01	IFN-gamma Dominant (Immune C2)
TCGA-A5-A1OG-01	IFN-gamma Dominant (Immune C2)
TCGA-44-A47A-01	IFN-gamma Dominant (Immune C2)
TCGA-B6-A0WV-01	Wound Healing (Immune C1)
TCGA-WB-A81J-01	Inflammatory (Immune C3)
TCGA-2G-AAL5-01	Wound Healing (Immune C1)
TCGA-HE-7129-01	Inflammatory (Immune C3)
TCGA-05-4398-01	IFN-gamma Dominant (Immune C2)
TCGA-HD-7753-01	IFN-gamma Dominant (Immune C2)
TCGA-FI-A2EU-01	IFN-gamma Dominant (Immune C2)
TCGA-BA-5559-01	IFN-gamma Dominant (Immune C2)
TCGA-KK-A59X-01	Lymphocyte Depleted (Immune C4)
TCGA-LN-A4MQ-01	Wound Healing (Immune C1)
TCGA-UL-AAZ6-01	IFN-gamma Dominant (Immune C2)
TCGA-B6-A0RG-01	IFN-gamma Dominant (Immune C2)
TCGA-SP-A6QC-01	Lymphocyte Depleted (Immune C4)
TCGA-SJ-A6ZI-01	IFN-gamma Dominant (Immune C2)
TCGA-67-3773-01	Inflammatory (Immune C3)
TCGA-24-1562-01	Wound Healing (Immune C1)
TCGA-VS-AA62-01	IFN-gamma Dominant (Immune C2)
TCGA-EM-A3SU-01	Inflammatory (Immune C3)
TCGA-HT-7874-01	Immunologically Quiet (Immune C5)
TCGA-77-8007-01	Wound Healing (Immune C1)
TCGA-D1-A179-01	Wound Healing (Immune C1)
TCGA-FK-A3SG-01	Inflammatory (Immune C3)
TCGA-77-7463-01	Wound Healing (Immune C1)
TCGA-S9-A6TV-01	Lymphocyte Depleted (Immune C4)
TCGA-BH-A6R9-01	Wound Healing (Immune C1)
TCGA-39-5039-01	Wound Healing (Immune C1)
TCGA-UC-A7PG-01	Wound Healing (Immune C1)
TCGA-DK-A3IS-01	Wound Healing (Immune C1)
TCGA-BR-4363-01	IFN-gamma Dominant (Immune C2)
TCGA-CV-6943-01	IFN-gamma Dominant (Immune C2)
TCGA-64-5781-01	Wound Healing (Immune C1)
TCGA-L5-A4OX-01	IFN-gamma Dominant (Immune C2)
TCGA-UY-A8OD-01	Wound Healing (Immune C1)
TCGA-EO-A2CH-01	IFN-gamma Dominant (Immune C2)
TCGA-CQ-7068-01	IFN-gamma Dominant (Immune C2)
TCGA-VM-A8CD-01	Lymphocyte Depleted (Immune C4)
TCGA-D8-A1JN-01	Inflammatory (Immune C3)
TCGA-CV-5444-01	IFN-gamma Dominant (Immune C2)
TCGA-AR-A24P-01	Wound Healing (Immune C1)
TCGA-EA-A97N-01	IFN-gamma Dominant (Immune C2)
TCGA-LN-A49K-01	IFN-gamma Dominant (Immune C2)
TCGA-SX-A7SM-01	Lymphocyte Depleted (Immune C4)
TCGA-DJ-A4V5-01	Inflammatory (Immune C3)
TCGA-DD-AAEI-01	Lymphocyte Depleted (Immune C4)
TCGA-AZ-4615-01	IFN-gamma Dominant (Immune C2)
TCGA-06-0132-01	Lymphocyte Depleted (Immune C4)
TCGA-VR-A8EO-01	Wound Healing (Immune C1)
TCGA-HT-7616-01	Lymphocyte Depleted (Immune C4)
TCGA-CR-7395-01	IFN-gamma Dominant (Immune C2)
TCGA-DJ-A2PS-01	Inflammatory (Immune C3)
TCGA-BR-7196-01	IFN-gamma Dominant (Immune C2)
TCGA-AA-A02H-01	Wound Healing (Immune C1)
TCGA-AP-A0LL-01	Inflammatory (Immune C3)
TCGA-BP-4777-01	Inflammatory (Immune C3)
TCGA-24-2290-01	Lymphocyte Depleted (Immune C4)
TCGA-ET-A39J-01	Lymphocyte Depleted (Immune C4)
TCGA-E9-A1N9-01	Wound Healing (Immune C1)
TCGA-B6-A0I9-01	Wound Healing (Immune C1)
TCGA-CN-6022-01	Wound Healing (Immune C1)
TCGA-E8-A242-01	Inflammatory (Immune C3)
TCGA-DJ-A2Q5-01	Inflammatory (Immune C3)
TCGA-DW-7963-01	Inflammatory (Immune C3)
TCGA-E2-A1L9-01	IFN-gamma Dominant (Immune C2)
TCGA-NC-A5HE-01	IFN-gamma Dominant (Immune C2)
TCGA-BP-4797-01	Inflammatory (Immune C3)
TCGA-E5-A4U1-01	Wound Healing (Immune C1)
TCGA-OE-A75W-01	Wound Healing (Immune C1)
TCGA-DX-AB3C-01	Wound Healing (Immune C1)
TCGA-BP-4762-01	Inflammatory (Immune C3)
TCGA-AR-A1AP-01	IFN-gamma Dominant (Immune C2)
TCGA-KT-A7W1-01	Lymphocyte Depleted (Immune C4)
TCGA-44-3919-01	IFN-gamma Dominant (Immune C2)
TCGA-39-5035-01	IFN-gamma Dominant (Immune C2)
TCGA-CV-6952-01	IFN-gamma Dominant (Immune C2)
TCGA-BR-4367-01	IFN-gamma Dominant (Immune C2)
TCGA-CN-A63T-01	IFN-gamma Dominant (Immune C2)
TCGA-BH-A0H5-01	TGF-beta Dominant (Immune C6)
TCGA-OK-A5Q2-01	Inflammatory (Immune C3)
TCGA-B5-A0K9-01	Wound Healing (Immune C1)
TCGA-CV-A45P-01	IFN-gamma Dominant (Immune C2)
TCGA-BH-A0E6-01	Wound Healing (Immune C1)
TCGA-D8-A1JA-01	Lymphocyte Depleted (Immune C4)
TCGA-56-7221-01	IFN-gamma Dominant (Immune C2)
TCGA-4G-AAZT-01	Inflammatory (Immune C3)
TCGA-VR-A8EX-01	IFN-gamma Dominant (Immune C2)
TCGA-B0-4844-01	IFN-gamma Dominant (Immune C2)
TCGA-P5-A5F2-01	Immunologically Quiet (Immune C5)
TCGA-BP-4352-01	Wound Healing (Immune C1)
TCGA-99-8032-01	Wound Healing (Immune C1)
TCGA-BH-A0BW-01	IFN-gamma Dominant (Immune C2)
TCGA-DW-7841-01	Inflammatory (Immune C3)
TCGA-H7-8502-01	IFN-gamma Dominant (Immune C2)
TCGA-CV-A6JN-01	IFN-gamma Dominant (Immune C2)
TCGA-OR-A5LN-01	Inflammatory (Immune C3)
TCGA-BH-A0HB-01	IFN-gamma Dominant (Immune C2)
TCGA-AG-3609-01	IFN-gamma Dominant (Immune C2)
TCGA-29-1695-01	Lymphocyte Depleted (Immune C4)
TCGA-H2-A2K9-01	Inflammatory (Immune C3)
TCGA-G9-7509-01	Inflammatory (Immune C3)
TCGA-FV-A2QR-01	Inflammatory (Immune C3)
TCGA-19-2629-01	Lymphocyte Depleted (Immune C4)
TCGA-B2-4098-01	Inflammatory (Immune C3)
TCGA-D7-8575-01	Inflammatory (Immune C3)
TCGA-HT-7607-01	Immunologically Quiet (Immune C5)
TCGA-CR-7380-01	IFN-gamma Dominant (Immune C2)
TCGA-43-2576-01	Wound Healing (Immune C1)
TCGA-DJ-A2PW-01	IFN-gamma Dominant (Immune C2)
TCGA-N8-A56S-01	Wound Healing (Immune C1)
TCGA-BR-8367-01	Wound Healing (Immune C1)
TCGA-ET-A3BW-01	Inflammatory (Immune C3)
TCGA-06-0238-01	Lymphocyte Depleted (Immune C4)
TCGA-FB-AAQ3-01	IFN-gamma Dominant (Immune C2)
TCGA-CJ-5679-01	Inflammatory (Immune C3)
TCGA-C5-A8YR-01	IFN-gamma Dominant (Immune C2)
TCGA-AQ-A54O-01	Wound Healing (Immune C1)
TCGA-V1-A9Z7-01	Wound Healing (Immune C1)
TCGA-KL-8346-01	Inflammatory (Immune C3)
TCGA-FE-A239-01	Inflammatory (Immune C3)
TCGA-DQ-7594-01	IFN-gamma Dominant (Immune C2)
TCGA-XF-A8HF-01	Wound Healing (Immune C1)
TCGA-KQ-A41P-01	Wound Healing (Immune C1)
TCGA-DX-A8BH-01	IFN-gamma Dominant (Immune C2)
TCGA-DD-AACT-01	Inflammatory (Immune C3)
TCGA-BL-A13I-01	Lymphocyte Depleted (Immune C4)
TCGA-DX-A7EU-01	Inflammatory (Immune C3)
TCGA-B6-A0WZ-01	IFN-gamma Dominant (Immune C2)
TCGA-C8-A135-01	Wound Healing (Immune C1)
TCGA-39-5027-01	Wound Healing (Immune C1)
TCGA-HD-7917-01	IFN-gamma Dominant (Immune C2)
TCGA-A5-A0VQ-01	Wound Healing (Immune C1)
TCGA-22-5485-01	Lymphocyte Depleted (Immune C4)
TCGA-EL-A4K1-01	Inflammatory (Immune C3)
TCGA-H4-A2HQ-01	IFN-gamma Dominant (Immune C2)
TCGA-AK-3427-01	Lymphocyte Depleted (Immune C4)
TCGA-DJ-A2PX-01	Inflammatory (Immune C3)
TCGA-BH-A0BJ-01	Inflammatory (Immune C3)
TCGA-BH-A203-01	Wound Healing (Immune C1)
TCGA-BG-A0M0-01	Wound Healing (Immune C1)
TCGA-24-1419-01	IFN-gamma Dominant (Immune C2)
TCGA-AG-3583-01	Wound Healing (Immune C1)
TCGA-V4-A9F7-01	Lymphocyte Depleted (Immune C4)
TCGA-GL-A9DD-01	Inflammatory (Immune C3)
TCGA-13-A5FT-01	IFN-gamma Dominant (Immune C2)
TCGA-WB-A81M-01	Lymphocyte Depleted (Immune C4)
TCGA-HT-7873-01	Immunologically Quiet (Immune C5)
TCGA-55-A491-01	IFN-gamma Dominant (Immune C2)
TCGA-FY-A3NM-01	Inflammatory (Immune C3)
TCGA-06-0749-01	Lymphocyte Depleted (Immune C4)
TCGA-ND-A4WF-01	Wound Healing (Immune C1)
TCGA-AZ-4681-01	Wound Healing (Immune C1)
TCGA-46-6025-01	IFN-gamma Dominant (Immune C2)
TCGA-FE-A236-01	Lymphocyte Depleted (Immune C4)
TCGA-ZF-AA4W-01	IFN-gamma Dominant (Immune C2)
TCGA-UY-A9PA-01	IFN-gamma Dominant (Immune C2)
TCGA-AA-3968-01	Wound Healing (Immune C1)
TCGA-BG-A0MO-01	IFN-gamma Dominant (Immune C2)
TCGA-HT-7603-01	Immunologically Quiet (Immune C5)
TCGA-AJ-A2QN-01	Wound Healing (Immune C1)
TCGA-AJ-A3NF-01	IFN-gamma Dominant (Immune C2)
TCGA-FU-A40J-01	IFN-gamma Dominant (Immune C2)
TCGA-B9-4116-01	Inflammatory (Immune C3)
TCGA-BH-A0C7-01	IFN-gamma Dominant (Immune C2)
TCGA-50-6595-01	IFN-gamma Dominant (Immune C2)
TCGA-DB-A64P-01	Immunologically Quiet (Immune C5)
TCGA-BP-4981-01	Inflammatory (Immune C3)
TCGA-VS-A9V5-01	Wound Healing (Immune C1)
TCGA-AK-3428-01	Inflammatory (Immune C3)
TCGA-CR-7373-01	IFN-gamma Dominant (Immune C2)
TCGA-G4-6311-01	Wound Healing (Immune C1)
TCGA-BH-A8FZ-01	IFN-gamma Dominant (Immune C2)
TCGA-S3-AA17-01	IFN-gamma Dominant (Immune C2)
TCGA-DF-A2L0-01	IFN-gamma Dominant (Immune C2)
TCGA-CI-6619-01	Wound Healing (Immune C1)
TCGA-B7-A5TI-01	Wound Healing (Immune C1)
TCGA-D8-A13Z-01	IFN-gamma Dominant (Immune C2)
TCGA-BA-5152-01	IFN-gamma Dominant (Immune C2)
TCGA-DD-AAEE-01	Lymphocyte Depleted (Immune C4)
TCGA-A4-7997-01	Lymphocyte Depleted (Immune C4)
TCGA-DX-A48O-01	Inflammatory (Immune C3)
TCGA-A7-A6VX-01	IFN-gamma Dominant (Immune C2)
TCGA-VS-A8Q9-01	IFN-gamma Dominant (Immune C2)
TCGA-60-2713-01	Wound Healing (Immune C1)
TCGA-GU-A42Q-01	Wound Healing (Immune C1)
TCGA-95-A4VP-01	Inflammatory (Immune C3)
TCGA-BP-4340-01	Inflammatory (Immune C3)
TCGA-HC-8261-01	Inflammatory (Immune C3)
TCGA-85-A512-01	Wound Healing (Immune C1)
TCGA-ET-A25P-01	Inflammatory (Immune C3)
TCGA-DJ-A3VI-01	Inflammatory (Immune C3)
TCGA-55-8302-01	IFN-gamma Dominant (Immune C2)
TCGA-44-4112-01	Wound Healing (Immune C1)
TCGA-EJ-A65E-01	Inflammatory (Immune C3)
TCGA-AF-3911-01	Wound Healing (Immune C1)
TCGA-UF-A7JJ-01	IFN-gamma Dominant (Immune C2)
TCGA-05-4430-01	IFN-gamma Dominant (Immune C2)
TCGA-AR-A255-01	IFN-gamma Dominant (Immune C2)
TCGA-WB-A81F-01	Inflammatory (Immune C3)
TCGA-V4-A9EQ-01	Lymphocyte Depleted (Immune C4)
TCGA-HZ-7919-01	Wound Healing (Immune C1)
TCGA-CN-5366-01	IFN-gamma Dominant (Immune C2)
TCGA-AR-A1AT-01	IFN-gamma Dominant (Immune C2)
TCGA-E5-A2PC-01	IFN-gamma Dominant (Immune C2)
TCGA-AD-6899-01	Wound Healing (Immune C1)
TCGA-YL-A8HM-01	IFN-gamma Dominant (Immune C2)
TCGA-CD-A486-01	IFN-gamma Dominant (Immune C2)
TCGA-UY-A9PE-01	Wound Healing (Immune C1)
TCGA-CQ-7071-01	IFN-gamma Dominant (Immune C2)
TCGA-D1-A3DG-01	Wound Healing (Immune C1)
TCGA-VQ-A8PX-01	IFN-gamma Dominant (Immune C2)
TCGA-XF-A9SV-01	Wound Healing (Immune C1)
TCGA-24-1924-01	IFN-gamma Dominant (Immune C2)
TCGA-DX-A6BG-01	Wound Healing (Immune C1)
TCGA-E7-A6MF-01	Inflammatory (Immune C3)
TCGA-MM-A84U-01	Inflammatory (Immune C3)
TCGA-CV-6933-01	Wound Healing (Immune C1)
TCGA-E2-A1B0-01	Wound Healing (Immune C1)
TCGA-DS-A0VL-01	IFN-gamma Dominant (Immune C2)
TCGA-63-6202-01	IFN-gamma Dominant (Immune C2)
TCGA-BF-AAP2-01	IFN-gamma Dominant (Immune C2)
TCGA-46-3767-01	Wound Healing (Immune C1)
TCGA-2G-AALO-01	Inflammatory (Immune C3)
TCGA-EM-A4FQ-01	Inflammatory (Immune C3)
TCGA-B0-5095-01	Inflammatory (Immune C3)
TCGA-CI-6622-01	Wound Healing (Immune C1)
TCGA-BP-4167-01	Inflammatory (Immune C3)
TCGA-AG-3601-01	Wound Healing (Immune C1)
TCGA-ZP-A9D2-01	IFN-gamma Dominant (Immune C2)
TCGA-BH-A18R-01	Wound Healing (Immune C1)
TCGA-BA-7269-01	Wound Healing (Immune C1)
TCGA-CG-4466-01	Wound Healing (Immune C1)
TCGA-HU-A4G3-01	Wound Healing (Immune C1)
TCGA-OR-A5KY-01	Lymphocyte Depleted (Immune C4)
TCGA-NH-A6GC-01	Wound Healing (Immune C1)
TCGA-DX-A48K-01	Wound Healing (Immune C1)
TCGA-DD-A73B-01	Lymphocyte Depleted (Immune C4)
TCGA-AC-A4ZE-01	Inflammatory (Immune C3)
TCGA-P5-A5F1-01	Lymphocyte Depleted (Immune C4)
TCGA-DK-AA6X-01	IFN-gamma Dominant (Immune C2)
TCGA-EO-A22T-01	Wound Healing (Immune C1)
TCGA-BR-7722-01	Inflammatory (Immune C3)
TCGA-BI-A0VR-01	IFN-gamma Dominant (Immune C2)
TCGA-A6-3808-01	Wound Healing (Immune C1)
TCGA-33-AAS8-01	Wound Healing (Immune C1)
TCGA-AR-A24H-01	IFN-gamma Dominant (Immune C2)
TCGA-F4-6570-01	Wound Healing (Immune C1)
TCGA-E8-A432-01	Inflammatory (Immune C3)
TCGA-MZ-A5BI-01	IFN-gamma Dominant (Immune C2)
TCGA-EJ-8474-01	Inflammatory (Immune C3)
TCGA-DU-7011-01	Immunologically Quiet (Immune C5)
TCGA-06-5414-01	Lymphocyte Depleted (Immune C4)
TCGA-J9-A8CP-01	Inflammatory (Immune C3)
TCGA-ZF-A9R9-01	Inflammatory (Immune C3)
TCGA-P8-A6RX-01	Inflammatory (Immune C3)
TCGA-JY-A6FE-01	IFN-gamma Dominant (Immune C2)
TCGA-A8-A099-01	Inflammatory (Immune C3)
TCGA-CM-6679-01	Wound Healing (Immune C1)
TCGA-KL-8342-01	Inflammatory (Immune C3)
TCGA-XF-A8HB-01	TGF-beta Dominant (Immune C6)
TCGA-HT-8019-01	Immunologically Quiet (Immune C5)
TCGA-HV-A5A4-01	IFN-gamma Dominant (Immune C2)
TCGA-DC-6157-01	Wound Healing (Immune C1)
TCGA-NQ-A638-01	Wound Healing (Immune C1)
TCGA-VS-A9UU-01	IFN-gamma Dominant (Immune C2)
TCGA-66-2790-01	IFN-gamma Dominant (Immune C2)
TCGA-V1-A8WS-01	Wound Healing (Immune C1)
TCGA-CE-A3MD-01	Inflammatory (Immune C3)
TCGA-HU-A4GD-01	IFN-gamma Dominant (Immune C2)
TCGA-94-7033-01	IFN-gamma Dominant (Immune C2)
TCGA-VQ-A94U-01	Wound Healing (Immune C1)
TCGA-LK-A4O0-01	Wound Healing (Immune C1)
TCGA-XD-AAUG-01	Wound Healing (Immune C1)
TCGA-FV-A4ZP-01	Lymphocyte Depleted (Immune C4)
TCGA-KN-8435-01	Inflammatory (Immune C3)
TCGA-P5-A77X-01	Immunologically Quiet (Immune C5)
TCGA-NC-A5HI-01	Wound Healing (Immune C1)
TCGA-ZJ-AAXN-01	IFN-gamma Dominant (Immune C2)
TCGA-BP-4781-01	Inflammatory (Immune C3)
TCGA-CV-6937-01	Wound Healing (Immune C1)
TCGA-AJ-A3QS-01	IFN-gamma Dominant (Immune C2)
TCGA-DD-AACS-01	Lymphocyte Depleted (Immune C4)
TCGA-MT-A67F-01	IFN-gamma Dominant (Immune C2)
TCGA-VS-A9U6-01	IFN-gamma Dominant (Immune C2)
TCGA-EB-A6QZ-01	Lymphocyte Depleted (Immune C4)
TCGA-5P-A9KF-01	Inflammatory (Immune C3)
TCGA-EB-A1NK-01	Wound Healing (Immune C1)
TCGA-RY-A843-01	Immunologically Quiet (Immune C5)
TCGA-A8-A09R-01	Wound Healing (Immune C1)
TCGA-DK-AA6S-01	Wound Healing (Immune C1)
TCGA-V1-A9Z8-01	Inflammatory (Immune C3)
TCGA-DD-A4NK-01	Inflammatory (Immune C3)
TCGA-CM-4750-01	IFN-gamma Dominant (Immune C2)
TCGA-VQ-A8PJ-01	Wound Healing (Immune C1)
TCGA-KQ-A41S-01	Wound Healing (Immune C1)
TCGA-4Z-AA7O-01	Wound Healing (Immune C1)
TCGA-55-8507-01	Wound Healing (Immune C1)
TCGA-DJ-A3UN-01	Inflammatory (Immune C3)
TCGA-HW-7493-01	Immunologically Quiet (Immune C5)
TCGA-BG-A0MC-01	Inflammatory (Immune C3)
TCGA-D6-6516-01	IFN-gamma Dominant (Immune C2)
TCGA-C5-A2LX-01	IFN-gamma Dominant (Immune C2)
TCGA-CR-6471-01	IFN-gamma Dominant (Immune C2)
TCGA-VM-A8CA-01	Immunologically Quiet (Immune C5)
TCGA-D1-A17M-01	IFN-gamma Dominant (Immune C2)
TCGA-D8-A27G-01	Wound Healing (Immune C1)
TCGA-B0-5699-01	Inflammatory (Immune C3)
TCGA-AA-3845-01	IFN-gamma Dominant (Immune C2)
TCGA-A5-A0GH-01	Wound Healing (Immune C1)
TCGA-XQ-A8TB-01	Inflammatory (Immune C3)
TCGA-37-5819-01	Wound Healing (Immune C1)
TCGA-DU-7015-01	Immunologically Quiet (Immune C5)
TCGA-MQ-A4LJ-01	Wound Healing (Immune C1)
TCGA-C5-A1M8-01	IFN-gamma Dominant (Immune C2)
TCGA-C5-A7CJ-01	IFN-gamma Dominant (Immune C2)
TCGA-AA-3980-01	IFN-gamma Dominant (Immune C2)
TCGA-22-A5C4-01	Wound Healing (Immune C1)
TCGA-HB-A2OT-01	Lymphocyte Depleted (Immune C4)
TCGA-85-A4CL-01	Wound Healing (Immune C1)
TCGA-TM-A7C5-01	Immunologically Quiet (Immune C5)
TCGA-06-0184-01	Lymphocyte Depleted (Immune C4)
TCGA-ZF-AA56-01	IFN-gamma Dominant (Immune C2)
TCGA-BP-4801-01	Inflammatory (Immune C3)
TCGA-D8-A1XC-01	Inflammatory (Immune C3)
TCGA-DU-8162-01	Immunologically Quiet (Immune C5)
TCGA-TM-A84O-01	Immunologically Quiet (Immune C5)
TCGA-06-5410-01	Lymphocyte Depleted (Immune C4)
TCGA-DC-6158-01	IFN-gamma Dominant (Immune C2)
TCGA-HT-A4DS-01	Lymphocyte Depleted (Immune C4)
TCGA-69-8254-01	Inflammatory (Immune C3)
TCGA-AA-A00N-01	Wound Healing (Immune C1)
TCGA-EM-A3FM-01	Inflammatory (Immune C3)
TCGA-GH-A9DA-01	Wound Healing (Immune C1)
TCGA-TN-A7HL-01	IFN-gamma Dominant (Immune C2)
TCGA-3B-A9HT-01	IFN-gamma Dominant (Immune C2)
TCGA-CN-4742-01	IFN-gamma Dominant (Immune C2)
TCGA-AA-3984-01	IFN-gamma Dominant (Immune C2)
TCGA-FY-A3R7-01	Inflammatory (Immune C3)
TCGA-BH-A1FJ-01	IFN-gamma Dominant (Immune C2)
TCGA-DD-AACX-01	Lymphocyte Depleted (Immune C4)
TCGA-78-8640-01	IFN-gamma Dominant (Immune C2)
TCGA-DJ-A3UY-01	Inflammatory (Immune C3)
TCGA-EW-A1PE-01	IFN-gamma Dominant (Immune C2)
TCGA-E2-A1II-01	IFN-gamma Dominant (Immune C2)
TCGA-S3-AA14-01	Wound Healing (Immune C1)
TCGA-CR-7392-01	IFN-gamma Dominant (Immune C2)
TCGA-CV-7100-01	IFN-gamma Dominant (Immune C2)
TCGA-60-2714-01	IFN-gamma Dominant (Immune C2)
TCGA-2G-AAFO-01	IFN-gamma Dominant (Immune C2)
TCGA-AR-A5QP-01	Wound Healing (Immune C1)
TCGA-NF-A4WX-01	Wound Healing (Immune C1)
TCGA-K6-A3WQ-01	IFN-gamma Dominant (Immune C2)
TCGA-E9-A6HE-01	IFN-gamma Dominant (Immune C2)
TCGA-BR-8291-01	Inflammatory (Immune C3)
TCGA-DD-AADA-01	Inflammatory (Immune C3)
TCGA-TQ-A7RN-01	Immunologically Quiet (Immune C5)
TCGA-ZM-AA0B-01	IFN-gamma Dominant (Immune C2)
TCGA-GL-A9DE-01	Lymphocyte Depleted (Immune C4)
TCGA-QR-A70O-01	Inflammatory (Immune C3)
TCGA-BH-A0HI-01	Wound Healing (Immune C1)
TCGA-XE-AANI-01	Wound Healing (Immune C1)
TCGA-ET-A3DT-01	Inflammatory (Immune C3)
TCGA-F4-6806-01	Wound Healing (Immune C1)
TCGA-DD-A1EI-01	Wound Healing (Immune C1)
TCGA-AP-A0LG-01	Wound Healing (Immune C1)
TCGA-NH-A50U-01	IFN-gamma Dominant (Immune C2)
TCGA-BP-4790-01	Inflammatory (Immune C3)
TCGA-AX-A1C8-01	IFN-gamma Dominant (Immune C2)
TCGA-BP-5008-01	Inflammatory (Immune C3)
TCGA-P8-A6RY-01	Lymphocyte Depleted (Immune C4)
TCGA-AJ-A3BK-01	IFN-gamma Dominant (Immune C2)
TCGA-CR-6480-01	IFN-gamma Dominant (Immune C2)
TCGA-AA-3692-01	Wound Healing (Immune C1)
TCGA-AF-2693-01	Wound Healing (Immune C1)
TCGA-D5-6924-01	Wound Healing (Immune C1)
TCGA-28-2513-01	Lymphocyte Depleted (Immune C4)
TCGA-EW-A1P1-01	Wound Healing (Immune C1)
TCGA-AA-A01R-01	IFN-gamma Dominant (Immune C2)
TCGA-V4-A9EF-01	Lymphocyte Depleted (Immune C4)
TCGA-JU-AAVI-01	IFN-gamma Dominant (Immune C2)
TCGA-QR-A70R-01	Inflammatory (Immune C3)
TCGA-OL-A66P-01	IFN-gamma Dominant (Immune C2)
TCGA-NG-A4VW-01	Wound Healing (Immune C1)
TCGA-CG-4462-01	TGF-beta Dominant (Immune C6)
TCGA-A2-A1G4-01	Wound Healing (Immune C1)
TCGA-E2-A105-01	Wound Healing (Immune C1)
TCGA-55-7573-01	Inflammatory (Immune C3)
TCGA-N5-A4RA-01	Wound Healing (Immune C1)
TCGA-E6-A1LZ-01	Wound Healing (Immune C1)
TCGA-L5-A4OR-01	Wound Healing (Immune C1)
TCGA-EY-A2OM-01	Wound Healing (Immune C1)
TCGA-CV-A45W-01	IFN-gamma Dominant (Immune C2)
TCGA-EJ-5502-01	Inflammatory (Immune C3)
TCGA-B0-5085-01	Inflammatory (Immune C3)
TCGA-2L-AAQL-01	TGF-beta Dominant (Immune C6)
TCGA-D1-A17F-01	IFN-gamma Dominant (Immune C2)
TCGA-HC-8265-01	Wound Healing (Immune C1)
TCGA-AD-6965-01	Wound Healing (Immune C1)
TCGA-BJ-A3PR-01	IFN-gamma Dominant (Immune C2)
TCGA-SH-A7BD-01	IFN-gamma Dominant (Immune C2)
TCGA-H2-A422-01	Inflammatory (Immune C3)
TCGA-EY-A549-01	Inflammatory (Immune C3)
TCGA-DX-A6YU-01	TGF-beta Dominant (Immune C6)
TCGA-P5-A735-01	Immunologically Quiet (Immune C5)
TCGA-VQ-A928-01	Wound Healing (Immune C1)
TCGA-D5-6931-01	Wound Healing (Immune C1)
TCGA-DX-A6Z2-01	Inflammatory (Immune C3)
TCGA-BS-A0V6-01	IFN-gamma Dominant (Immune C2)
TCGA-BC-A10T-01	Wound Healing (Immune C1)
TCGA-AA-3872-01	Wound Healing (Immune C1)
TCGA-43-5668-01	IFN-gamma Dominant (Immune C2)
TCGA-R8-A6ML-01	Immunologically Quiet (Immune C5)
TCGA-FB-AAQ0-01	IFN-gamma Dominant (Immune C2)
TCGA-BF-AAP1-01	Lymphocyte Depleted (Immune C4)
TCGA-A2-A0EV-01	IFN-gamma Dominant (Immune C2)
TCGA-HT-7691-01	Immunologically Quiet (Immune C5)
TCGA-18-4083-01	Wound Healing (Immune C1)
TCGA-FG-A6J1-01	Lymphocyte Depleted (Immune C4)
TCGA-CV-7104-01	IFN-gamma Dominant (Immune C2)
TCGA-EO-A22S-01	Wound Healing (Immune C1)
TCGA-A8-A08A-01	Inflammatory (Immune C3)
TCGA-D1-A17B-01	Inflammatory (Immune C3)
TCGA-CD-8526-01	IFN-gamma Dominant (Immune C2)
TCGA-BR-7703-01	IFN-gamma Dominant (Immune C2)
TCGA-W8-A86G-01	Inflammatory (Immune C3)
TCGA-AL-3471-01	Inflammatory (Immune C3)
TCGA-MH-A854-01	Wound Healing (Immune C1)
TCGA-YF-AA3M-01	Wound Healing (Immune C1)
TCGA-76-4929-01	Lymphocyte Depleted (Immune C4)
TCGA-2Y-A9H6-01	Inflammatory (Immune C3)
TCGA-44-2656-01	IFN-gamma Dominant (Immune C2)
TCGA-A6-5656-01	Wound Healing (Immune C1)
TCGA-43-8115-01	Wound Healing (Immune C1)
TCGA-3A-A9IX-01	Inflammatory (Immune C3)
TCGA-EI-6884-01	Wound Healing (Immune C1)
TCGA-DU-6402-01	Lymphocyte Depleted (Immune C4)
TCGA-AG-3890-01	Wound Healing (Immune C1)
TCGA-Q1-A73P-01	IFN-gamma Dominant (Immune C2)
TCGA-39-5016-01	IFN-gamma Dominant (Immune C2)
TCGA-HT-7684-01	Immunologically Quiet (Immune C5)
TCGA-D8-A1XL-01	IFN-gamma Dominant (Immune C2)
TCGA-E8-A413-01	Inflammatory (Immune C3)
TCGA-BA-6871-01	IFN-gamma Dominant (Immune C2)
TCGA-HT-8104-01	Lymphocyte Depleted (Immune C4)
TCGA-CN-6017-01	IFN-gamma Dominant (Immune C2)
TCGA-CC-A7IH-01	Inflammatory (Immune C3)
TCGA-D7-A747-01	IFN-gamma Dominant (Immune C2)
TCGA-A4-7585-01	Inflammatory (Immune C3)
TCGA-TS-A7P6-01	Wound Healing (Immune C1)
TCGA-BG-A0W2-01	Wound Healing (Immune C1)
TCGA-DD-A4NG-01	Inflammatory (Immune C3)
TCGA-BP-5170-01	Inflammatory (Immune C3)
TCGA-FN-7833-01	Lymphocyte Depleted (Immune C4)
TCGA-KN-8436-01	Inflammatory (Immune C3)
TCGA-C5-A8XK-01	IFN-gamma Dominant (Immune C2)
TCGA-43-A474-01	Wound Healing (Immune C1)
TCGA-HT-7473-01	Lymphocyte Depleted (Immune C4)
TCGA-06-0645-01	Lymphocyte Depleted (Immune C4)
TCGA-33-AASI-01	Wound Healing (Immune C1)
TCGA-DM-A1DA-01	Wound Healing (Immune C1)
TCGA-IB-7647-01	Wound Healing (Immune C1)
TCGA-BJ-A2N9-01	Inflammatory (Immune C3)
TCGA-41-2572-01	Lymphocyte Depleted (Immune C4)
TCGA-AG-3885-01	Inflammatory (Immune C3)
TCGA-CF-A7I0-01	Wound Healing (Immune C1)
TCGA-EK-A3GN-01	IFN-gamma Dominant (Immune C2)
TCGA-WJ-A86L-01	Lymphocyte Depleted (Immune C4)
TCGA-DX-AB2X-01	Lymphocyte Depleted (Immune C4)
TCGA-MJ-A850-01	Wound Healing (Immune C1)
TCGA-C5-A907-01	IFN-gamma Dominant (Immune C2)
TCGA-49-4506-01	IFN-gamma Dominant (Immune C2)
TCGA-B0-5713-01	Inflammatory (Immune C3)
TCGA-BQ-5877-01	Inflammatory (Immune C3)
TCGA-D1-A160-01	Wound Healing (Immune C1)
TCGA-BR-6564-01	IFN-gamma Dominant (Immune C2)
TCGA-B2-5633-01	Inflammatory (Immune C3)
TCGA-BH-A0BZ-01	IFN-gamma Dominant (Immune C2)
TCGA-XF-AAMX-01	Wound Healing (Immune C1)
TCGA-OR-A5LR-01	Inflammatory (Immune C3)
TCGA-A2-A0ER-01	Wound Healing (Immune C1)
TCGA-IG-A8O2-01	IFN-gamma Dominant (Immune C2)
TCGA-AX-A1C7-01	IFN-gamma Dominant (Immune C2)
TCGA-TQ-A7RU-01	Immunologically Quiet (Immune C5)
TCGA-BP-4982-01	Inflammatory (Immune C3)
TCGA-JY-A938-01	IFN-gamma Dominant (Immune C2)
TCGA-XF-A9T8-01	IFN-gamma Dominant (Immune C2)
TCGA-2G-AAG0-01	IFN-gamma Dominant (Immune C2)
TCGA-EO-A22X-01	Wound Healing (Immune C1)
TCGA-DD-A4ND-01	Inflammatory (Immune C3)
TCGA-B8-5162-01	Inflammatory (Immune C3)
TCGA-66-2785-01	IFN-gamma Dominant (Immune C2)
TCGA-25-1630-01	Lymphocyte Depleted (Immune C4)
TCGA-OL-A66K-01	Inflammatory (Immune C3)
TCGA-P4-A5E8-01	Inflammatory (Immune C3)
TCGA-Q9-A6FW-01	Wound Healing (Immune C1)
TCGA-IN-7806-01	Inflammatory (Immune C3)
TCGA-36-1574-01	IFN-gamma Dominant (Immune C2)
TCGA-QK-A8Z8-01	IFN-gamma Dominant (Immune C2)
TCGA-CQ-5326-01	IFN-gamma Dominant (Immune C2)
TCGA-DB-A4XF-01	Immunologically Quiet (Immune C5)
TCGA-2Y-A9H2-01	Inflammatory (Immune C3)
TCGA-C5-A7CM-01	Wound Healing (Immune C1)
TCGA-4K-AAAL-01	IFN-gamma Dominant (Immune C2)
TCGA-A4-A5Y1-01	Inflammatory (Immune C3)
TCGA-56-8201-01	Wound Healing (Immune C1)
TCGA-G9-6342-01	Inflammatory (Immune C3)
TCGA-KU-A66T-01	IFN-gamma Dominant (Immune C2)
TCGA-DD-AAVW-01	Inflammatory (Immune C3)
TCGA-CJ-4905-01	Inflammatory (Immune C3)
TCGA-EP-A2KC-01	Lymphocyte Depleted (Immune C4)
TCGA-MT-A51W-01	IFN-gamma Dominant (Immune C2)
TCGA-LN-A7HY-01	Wound Healing (Immune C1)
TCGA-FY-A3R8-01	Inflammatory (Immune C3)
TCGA-WB-A81H-01	Inflammatory (Immune C3)
TCGA-G7-6790-01	Inflammatory (Immune C3)
TCGA-XY-A89B-01	IFN-gamma Dominant (Immune C2)
TCGA-CC-A7IL-01	Lymphocyte Depleted (Immune C4)
TCGA-EW-A1OX-01	Lymphocyte Depleted (Immune C4)
TCGA-EL-A3T1-01	IFN-gamma Dominant (Immune C2)
TCGA-55-A48X-01	Inflammatory (Immune C3)
TCGA-YZ-A984-01	Inflammatory (Immune C3)
TCGA-BP-5174-01	Inflammatory (Immune C3)
TCGA-KN-8427-01	Wound Healing (Immune C1)
TCGA-QR-A705-01	Inflammatory (Immune C3)
TCGA-20-1684-01	IFN-gamma Dominant (Immune C2)
TCGA-N8-A4PI-01	Lymphocyte Depleted (Immune C4)
TCGA-05-4402-01	IFN-gamma Dominant (Immune C2)
TCGA-2G-AAH4-01	Wound Healing (Immune C1)
TCGA-CX-7086-01	IFN-gamma Dominant (Immune C2)
TCGA-ET-A25L-01	Inflammatory (Immune C3)
TCGA-UZ-A9PZ-01	Inflammatory (Immune C3)
TCGA-AG-3881-01	Wound Healing (Immune C1)
TCGA-A8-A0A9-01	IFN-gamma Dominant (Immune C2)
TCGA-DE-A2OL-01	Inflammatory (Immune C3)
TCGA-G7-A4TM-01	Inflammatory (Immune C3)
TCGA-BQ-7060-01	Inflammatory (Immune C3)
TCGA-DD-A4NS-01	Inflammatory (Immune C3)
TCGA-B0-4697-01	Inflammatory (Immune C3)
TCGA-QR-A6GO-01	Lymphocyte Depleted (Immune C4)
TCGA-AX-A3FS-01	IFN-gamma Dominant (Immune C2)
TCGA-S9-A6WP-01	Immunologically Quiet (Immune C5)
TCGA-BH-A1FB-01	Inflammatory (Immune C3)
TCGA-44-8119-01	Wound Healing (Immune C1)
TCGA-BP-4759-01	TGF-beta Dominant (Immune C6)
TCGA-FG-A713-01	Immunologically Quiet (Immune C5)
TCGA-DI-A1BY-01	Wound Healing (Immune C1)
TCGA-V4-A9EZ-01	Lymphocyte Depleted (Immune C4)
TCGA-VS-A9V2-01	IFN-gamma Dominant (Immune C2)
TCGA-VS-A94Y-01	Wound Healing (Immune C1)
TCGA-F4-6461-01	Wound Healing (Immune C1)
TCGA-90-A4EE-01	IFN-gamma Dominant (Immune C2)
TCGA-C5-A8ZZ-01	IFN-gamma Dominant (Immune C2)
TCGA-MQ-A6BS-01	Inflammatory (Immune C3)
TCGA-B5-A11G-01	IFN-gamma Dominant (Immune C2)
TCGA-HT-A5RA-01	Lymphocyte Depleted (Immune C4)
TCGA-E1-A7YL-01	Lymphocyte Depleted (Immune C4)
TCGA-AO-A0JC-01	IFN-gamma Dominant (Immune C2)
TCGA-JW-A852-01	IFN-gamma Dominant (Immune C2)
TCGA-BB-4224-01	IFN-gamma Dominant (Immune C2)
TCGA-CJ-6030-01	Inflammatory (Immune C3)
TCGA-A3-3319-01	Inflammatory (Immune C3)
TCGA-VQ-AA68-01	IFN-gamma Dominant (Immune C2)
TCGA-UD-AAC5-01	Wound Healing (Immune C1)
TCGA-DD-AADI-01	IFN-gamma Dominant (Immune C2)
TCGA-V4-A9F0-01	Inflammatory (Immune C3)
TCGA-FC-7961-01	Inflammatory (Immune C3)
TCGA-CC-A7IG-01	Wound Healing (Immune C1)
TCGA-MR-A8JO-01	Inflammatory (Immune C3)
TCGA-GC-A3YS-01	Wound Healing (Immune C1)
TCGA-OR-A5LG-01	Lymphocyte Depleted (Immune C4)
TCGA-VD-A8KH-01	Lymphocyte Depleted (Immune C4)
TCGA-CR-7379-01	Wound Healing (Immune C1)
TCGA-CJ-4918-01	Inflammatory (Immune C3)
TCGA-A8-A07J-01	TGF-beta Dominant (Immune C6)
TCGA-E9-A229-01	IFN-gamma Dominant (Immune C2)
TCGA-L5-A4OU-01	IFN-gamma Dominant (Immune C2)
TCGA-X9-A971-01	Lymphocyte Depleted (Immune C4)
TCGA-D6-6826-01	Wound Healing (Immune C1)
TCGA-A2-A0SX-01	IFN-gamma Dominant (Immune C2)
TCGA-CU-A0YO-01	Wound Healing (Immune C1)
TCGA-KK-A8I4-01	Inflammatory (Immune C3)
TCGA-UZ-A9PM-01	Inflammatory (Immune C3)
TCGA-B8-5545-01	Inflammatory (Immune C3)
TCGA-US-A776-01	Wound Healing (Immune C1)
TCGA-BR-8484-01	IFN-gamma Dominant (Immune C2)
TCGA-55-7724-01	IFN-gamma Dominant (Immune C2)
TCGA-F4-6703-01	Wound Healing (Immune C1)
TCGA-HU-A4G8-01	IFN-gamma Dominant (Immune C2)
TCGA-BC-A10W-01	Lymphocyte Depleted (Immune C4)
TCGA-DX-AB2Q-01	Wound Healing (Immune C1)
TCGA-44-6776-01	Inflammatory (Immune C3)
TCGA-49-4514-01	Wound Healing (Immune C1)
TCGA-05-4396-01	Inflammatory (Immune C3)
TCGA-AA-3864-01	Wound Healing (Immune C1)
TCGA-EJ-7789-01	Lymphocyte Depleted (Immune C4)
TCGA-85-A50Z-01	Wound Healing (Immune C1)
TCGA-B2-3923-01	Inflammatory (Immune C3)
TCGA-55-8204-01	Wound Healing (Immune C1)
TCGA-BP-5183-01	Inflammatory (Immune C3)
TCGA-V4-A9EA-01	Lymphocyte Depleted (Immune C4)
TCGA-QS-A5YR-01	IFN-gamma Dominant (Immune C2)
TCGA-L4-A4E6-01	Inflammatory (Immune C3)
TCGA-L5-A8NJ-01	IFN-gamma Dominant (Immune C2)
TCGA-DX-A1L0-01	TGF-beta Dominant (Immune C6)
TCGA-BH-A0AW-01	IFN-gamma Dominant (Immune C2)
TCGA-VS-A9UJ-01	Wound Healing (Immune C1)
TCGA-2G-AAF6-01	IFN-gamma Dominant (Immune C2)
TCGA-B5-A11P-01	Wound Healing (Immune C1)
TCGA-XD-AAUH-01	Inflammatory (Immune C3)
TCGA-AX-A3FW-01	IFN-gamma Dominant (Immune C2)
TCGA-BH-A2L8-01	IFN-gamma Dominant (Immune C2)
TCGA-HU-A4GC-01	IFN-gamma Dominant (Immune C2)
TCGA-EB-A5SE-01	Wound Healing (Immune C1)
TCGA-HT-A5R9-01	Lymphocyte Depleted (Immune C4)
TCGA-AA-3492-01	Wound Healing (Immune C1)
TCGA-A3-3362-01	Inflammatory (Immune C3)
TCGA-CS-5396-01	Immunologically Quiet (Immune C5)
TCGA-DX-AB32-01	IFN-gamma Dominant (Immune C2)
TCGA-BB-7866-01	IFN-gamma Dominant (Immune C2)
TCGA-HD-7832-01	IFN-gamma Dominant (Immune C2)
TCGA-Y8-A895-01	Inflammatory (Immune C3)
TCGA-A8-A08I-01	IFN-gamma Dominant (Immune C2)
TCGA-BH-A0HP-01	Wound Healing (Immune C1)
TCGA-14-0790-01	Lymphocyte Depleted (Immune C4)
TCGA-BH-A0BS-01	Lymphocyte Depleted (Immune C4)
TCGA-DJ-A4UL-01	Inflammatory (Immune C3)
TCGA-CD-A48C-01	Wound Healing (Immune C1)
TCGA-AA-3544-01	IFN-gamma Dominant (Immune C2)
TCGA-TS-A7P1-01	Wound Healing (Immune C1)
TCGA-75-6205-01	IFN-gamma Dominant (Immune C2)
TCGA-FP-8099-01	IFN-gamma Dominant (Immune C2)
TCGA-ZJ-AAXI-01	IFN-gamma Dominant (Immune C2)
TCGA-B6-A0IG-01	IFN-gamma Dominant (Immune C2)
TCGA-XN-A8T5-01	Inflammatory (Immune C3)
TCGA-ZG-A9M4-01	Inflammatory (Immune C3)
TCGA-EJ-7793-01	Inflammatory (Immune C3)
TCGA-AA-3496-01	Wound Healing (Immune C1)
TCGA-QR-A7IN-01	Inflammatory (Immune C3)
TCGA-ZF-AA4N-01	Wound Healing (Immune C1)
TCGA-XF-AAMG-01	Wound Healing (Immune C1)
TCGA-ZH-A8Y1-01	Inflammatory (Immune C3)
TCGA-DJ-A13T-01	Inflammatory (Immune C3)
TCGA-QR-A6GT-01	TGF-beta Dominant (Immune C6)
TCGA-AK-3451-01	IFN-gamma Dominant (Immune C2)
TCGA-CJ-4923-01	IFN-gamma Dominant (Immune C2)
TCGA-FV-A3R2-01	Lymphocyte Depleted (Immune C4)
TCGA-CZ-5987-01	Inflammatory (Immune C3)
TCGA-98-A538-01	Wound Healing (Immune C1)
TCGA-ET-A3BO-01	Inflammatory (Immune C3)
TCGA-KP-A3W0-01	Wound Healing (Immune C1)
TCGA-CV-6436-01	IFN-gamma Dominant (Immune C2)
TCGA-EJ-7782-01	Inflammatory (Immune C3)
TCGA-HW-8322-01	Immunologically Quiet (Immune C5)
TCGA-BP-4159-01	TGF-beta Dominant (Immune C6)
TCGA-Q1-A6DT-01	Wound Healing (Immune C1)
TCGA-85-6561-01	Wound Healing (Immune C1)
TCGA-L5-A8NN-01	IFN-gamma Dominant (Immune C2)
TCGA-ZF-A9RL-01	Lymphocyte Depleted (Immune C4)
TCGA-25-1633-01	IFN-gamma Dominant (Immune C2)
TCGA-25-2396-01	IFN-gamma Dominant (Immune C2)
TCGA-BR-7715-01	Wound Healing (Immune C1)
TCGA-BH-A0DO-01	Inflammatory (Immune C3)
TCGA-HC-A8CY-01	Lymphocyte Depleted (Immune C4)
TCGA-X6-A8C5-01	Inflammatory (Immune C3)
TCGA-DY-A0XA-01	Wound Healing (Immune C1)
TCGA-DM-A28E-01	Wound Healing (Immune C1)
TCGA-S9-A6U9-01	Immunologically Quiet (Immune C5)
TCGA-5R-AA1C-01	Lymphocyte Depleted (Immune C4)
TCGA-CK-6747-01	Wound Healing (Immune C1)
TCGA-WB-A819-01	Lymphocyte Depleted (Immune C4)
TCGA-Y8-A8S1-01	TGF-beta Dominant (Immune C6)
TCGA-G9-7523-01	Inflammatory (Immune C3)
TCGA-CJ-5680-01	Inflammatory (Immune C3)
TCGA-34-5234-01	IFN-gamma Dominant (Immune C2)
TCGA-A6-5667-01	Wound Healing (Immune C1)
TCGA-HT-7676-01	Immunologically Quiet (Immune C5)
TCGA-LN-A4A4-01	Wound Healing (Immune C1)
TCGA-XF-A9T0-01	Wound Healing (Immune C1)
TCGA-FW-A5DX-01	Lymphocyte Depleted (Immune C4)
TCGA-62-A46O-01	IFN-gamma Dominant (Immune C2)
TCGA-G3-AAV1-01	Lymphocyte Depleted (Immune C4)
TCGA-HT-7469-01	Lymphocyte Depleted (Immune C4)
TCGA-56-7822-01	Wound Healing (Immune C1)
TCGA-56-A62T-01	IFN-gamma Dominant (Immune C2)
TCGA-LL-A73Y-01	Inflammatory (Immune C3)
TCGA-BC-A10X-01	Inflammatory (Immune C3)
TCGA-EA-A3QE-01	IFN-gamma Dominant (Immune C2)
TCGA-BH-A0DK-01	IFN-gamma Dominant (Immune C2)
TCGA-GC-A4ZW-01	Wound Healing (Immune C1)
TCGA-K4-A4AC-01	IFN-gamma Dominant (Immune C2)
TCGA-85-A4JB-01	IFN-gamma Dominant (Immune C2)
TCGA-62-A472-01	IFN-gamma Dominant (Immune C2)
TCGA-NJ-A55R-01	Inflammatory (Immune C3)
TCGA-23-1026-01	IFN-gamma Dominant (Immune C2)
TCGA-VQ-A8E3-01	IFN-gamma Dominant (Immune C2)
TCGA-F5-6702-01	Wound Healing (Immune C1)
TCGA-VS-A9UQ-01	Wound Healing (Immune C1)
TCGA-BH-A0BG-01	IFN-gamma Dominant (Immune C2)
TCGA-AJ-A23N-01	Wound Healing (Immune C1)
TCGA-W5-AA34-01	Inflammatory (Immune C3)
TCGA-CA-5255-01	Wound Healing (Immune C1)
TCGA-93-A4JP-01	Lymphocyte Depleted (Immune C4)
TCGA-CK-4947-01	Wound Healing (Immune C1)
TCGA-FD-A3B3-01	IFN-gamma Dominant (Immune C2)
TCGA-IE-A6BZ-01	Inflammatory (Immune C3)
TCGA-FU-A3HY-01	Wound Healing (Immune C1)
TCGA-2G-AAGS-01	Wound Healing (Immune C1)
TCGA-V1-A8MU-01	Inflammatory (Immune C3)
TCGA-G6-A8L8-01	Inflammatory (Immune C3)
TCGA-KP-A3W1-01	IFN-gamma Dominant (Immune C2)
TCGA-CV-A6JZ-01	IFN-gamma Dominant (Immune C2)
TCGA-32-2634-01	Lymphocyte Depleted (Immune C4)
TCGA-BS-A0U7-01	Wound Healing (Immune C1)
TCGA-62-8395-01	Inflammatory (Immune C3)
TCGA-24-2261-01	IFN-gamma Dominant (Immune C2)
TCGA-AN-A0AT-01	Wound Healing (Immune C1)
TCGA-13-0800-01	IFN-gamma Dominant (Immune C2)
TCGA-3U-A98H-01	TGF-beta Dominant (Immune C6)
TCGA-77-8136-01	IFN-gamma Dominant (Immune C2)
TCGA-D1-A2G0-01	Wound Healing (Immune C1)
TCGA-ET-A40P-01	Inflammatory (Immune C3)
TCGA-CW-5589-01	Inflammatory (Immune C3)
TCGA-VQ-A8E0-01	Wound Healing (Immune C1)
TCGA-66-2756-01	Wound Healing (Immune C1)
TCGA-61-1998-01	Lymphocyte Depleted (Immune C4)
TCGA-23-1029-01	IFN-gamma Dominant (Immune C2)
TCGA-95-7567-01	IFN-gamma Dominant (Immune C2)
TCGA-E2-A14U-01	Inflammatory (Immune C3)
TCGA-AD-6888-01	Wound Healing (Immune C1)
TCGA-KB-A93G-01	Wound Healing (Immune C1)
TCGA-F4-6809-01	Wound Healing (Immune C1)
TCGA-A3-3385-01	Inflammatory (Immune C3)
TCGA-VS-A9UV-01	Wound Healing (Immune C1)
TCGA-50-5051-01	Wound Healing (Immune C1)
TCGA-BP-5000-01	Inflammatory (Immune C3)
TCGA-CN-A63U-01	IFN-gamma Dominant (Immune C2)
TCGA-AA-3502-01	Wound Healing (Immune C1)
TCGA-HT-7478-01	Lymphocyte Depleted (Immune C4)
TCGA-5P-A9K6-01	Inflammatory (Immune C3)
TCGA-VS-A8EG-01	IFN-gamma Dominant (Immune C2)
TCGA-IZ-8195-01	Inflammatory (Immune C3)
TCGA-43-8116-01	Wound Healing (Immune C1)
TCGA-MW-A4EC-01	Inflammatory (Immune C3)
TCGA-P3-A6T2-01	IFN-gamma Dominant (Immune C2)
TCGA-A3-3343-01	Inflammatory (Immune C3)
TCGA-L5-A4OM-01	Wound Healing (Immune C1)
TCGA-WB-A80Q-01	Inflammatory (Immune C3)
TCGA-BK-A13B-01	Wound Healing (Immune C1)
TCGA-EX-A69L-01	IFN-gamma Dominant (Immune C2)
TCGA-FJ-A871-01	Wound Healing (Immune C1)
TCGA-WB-A817-01	Inflammatory (Immune C3)
TCGA-55-A48Y-01	Wound Healing (Immune C1)
TCGA-BJ-A45F-01	Inflammatory (Immune C3)
TCGA-AA-3525-01	Wound Healing (Immune C1)
TCGA-AK-3447-01	Lymphocyte Depleted (Immune C4)
TCGA-Q1-A73O-01	IFN-gamma Dominant (Immune C2)
TCGA-D5-6532-01	Wound Healing (Immune C1)
TCGA-QR-A70J-01	IFN-gamma Dominant (Immune C2)
TCGA-CC-A9FU-01	Wound Healing (Immune C1)
TCGA-VS-A8QC-01	IFN-gamma Dominant (Immune C2)
TCGA-86-A456-01	IFN-gamma Dominant (Immune C2)
TCGA-33-AASB-01	Wound Healing (Immune C1)
TCGA-EA-A5ZE-01	IFN-gamma Dominant (Immune C2)
TCGA-XT-AASU-01	Wound Healing (Immune C1)
TCGA-FE-A22Z-01	Inflammatory (Immune C3)
TCGA-CV-7429-01	IFN-gamma Dominant (Immune C2)
TCGA-RW-A8AZ-01	Lymphocyte Depleted (Immune C4)
TCGA-50-5068-01	IFN-gamma Dominant (Immune C2)
TCGA-AG-A00Y-01	IFN-gamma Dominant (Immune C2)
TCGA-NJ-A55A-01	Inflammatory (Immune C3)
TCGA-ZS-A9CF-01	Lymphocyte Depleted (Immune C4)
TCGA-A4-8516-01	Lymphocyte Depleted (Immune C4)
TCGA-56-7580-01	Wound Healing (Immune C1)
TCGA-E8-A416-01	Inflammatory (Immune C3)
TCGA-S4-A8RM-01	Inflammatory (Immune C3)
TCGA-DU-A5TW-01	Immunologically Quiet (Immune C5)
TCGA-DX-AB2S-01	IFN-gamma Dominant (Immune C2)
TCGA-A5-A0R9-01	Wound Healing (Immune C1)
TCGA-IB-7890-01	Wound Healing (Immune C1)
TCGA-GD-A3OP-01	Inflammatory (Immune C3)
TCGA-90-7769-01	Wound Healing (Immune C1)
TCGA-CR-6467-01	IFN-gamma Dominant (Immune C2)
TCGA-S9-A6TX-01	Immunologically Quiet (Immune C5)
TCGA-B5-A0K8-01	IFN-gamma Dominant (Immune C2)
TCGA-IG-A97H-01	IFN-gamma Dominant (Immune C2)
TCGA-37-4135-01	IFN-gamma Dominant (Immune C2)
TCGA-RY-A83Z-01	Lymphocyte Depleted (Immune C4)
TCGA-IG-A5B8-01	IFN-gamma Dominant (Immune C2)
TCGA-JX-A5QV-01	IFN-gamma Dominant (Immune C2)
TCGA-AA-3930-01	IFN-gamma Dominant (Immune C2)
TCGA-BR-8683-01	IFN-gamma Dominant (Immune C2)
TCGA-DX-A8BQ-01	IFN-gamma Dominant (Immune C2)
TCGA-EW-A1P5-01	IFN-gamma Dominant (Immune C2)
TCGA-DJ-A13W-01	Lymphocyte Depleted (Immune C4)
TCGA-QR-A6GS-01	Inflammatory (Immune C3)
TCGA-FD-A3SL-01	Wound Healing (Immune C1)
TCGA-ET-A39L-01	Inflammatory (Immune C3)
TCGA-BH-A1FN-01	IFN-gamma Dominant (Immune C2)
TCGA-TS-A8AF-01	Wound Healing (Immune C1)
TCGA-EK-A2GZ-01	Wound Healing (Immune C1)
TCGA-N5-A4RM-01	Wound Healing (Immune C1)
TCGA-AZ-6600-01	Wound Healing (Immune C1)
TCGA-MM-A564-01	Inflammatory (Immune C3)
TCGA-E9-A3X8-01	Wound Healing (Immune C1)
TCGA-J4-A6G3-01	Inflammatory (Immune C3)
TCGA-51-4079-01	Wound Healing (Immune C1)
TCGA-DQ-7596-01	IFN-gamma Dominant (Immune C2)
TCGA-HZ-8002-01	Inflammatory (Immune C3)
TCGA-3A-A9IH-01	IFN-gamma Dominant (Immune C2)
TCGA-B5-A3FC-01	IFN-gamma Dominant (Immune C2)
TCGA-BJ-A0ZC-01	Inflammatory (Immune C3)
TCGA-98-8020-01	Wound Healing (Immune C1)
TCGA-CV-5970-01	IFN-gamma Dominant (Immune C2)
TCGA-DX-AB2G-01	TGF-beta Dominant (Immune C6)
TCGA-A7-A4SE-01	IFN-gamma Dominant (Immune C2)
TCGA-A1-A0SJ-01	Wound Healing (Immune C1)
TCGA-J2-A4AG-01	Inflammatory (Immune C3)
TCGA-EI-6510-01	Wound Healing (Immune C1)
TCGA-G4-6588-01	Wound Healing (Immune C1)
TCGA-RC-A7S9-01	Lymphocyte Depleted (Immune C4)
TCGA-22-5471-01	IFN-gamma Dominant (Immune C2)
TCGA-E2-A570-01	Wound Healing (Immune C1)
TCGA-CZ-5466-01	Inflammatory (Immune C3)
TCGA-CV-7425-01	IFN-gamma Dominant (Immune C2)
TCGA-EK-A2R9-01	IFN-gamma Dominant (Immune C2)
TCGA-QR-A6H4-01	Lymphocyte Depleted (Immune C4)
TCGA-BH-A201-01	Wound Healing (Immune C1)
TCGA-66-2744-01	IFN-gamma Dominant (Immune C2)
TCGA-61-2016-01	IFN-gamma Dominant (Immune C2)
TCGA-CN-4733-01	IFN-gamma Dominant (Immune C2)
TCGA-IR-A3LL-01	IFN-gamma Dominant (Immune C2)
TCGA-05-4405-01	Inflammatory (Immune C3)
TCGA-06-0125-01	Lymphocyte Depleted (Immune C4)
TCGA-V4-A9E5-01	Lymphocyte Depleted (Immune C4)
TCGA-DD-AA3A-01	Wound Healing (Immune C1)
TCGA-RW-A68A-01	Lymphocyte Depleted (Immune C4)
TCGA-AG-A036-01	Wound Healing (Immune C1)
TCGA-D1-A103-01	IFN-gamma Dominant (Immune C2)
TCGA-A5-A0R6-01	IFN-gamma Dominant (Immune C2)
TCGA-Y8-A8RZ-01	Lymphocyte Depleted (Immune C4)
TCGA-CR-5243-01	IFN-gamma Dominant (Immune C2)
TCGA-CZ-5469-01	Wound Healing (Immune C1)
TCGA-B6-A0RP-01	Inflammatory (Immune C3)
TCGA-D8-A27V-01	Inflammatory (Immune C3)
TCGA-ZF-AA4V-01	IFN-gamma Dominant (Immune C2)
TCGA-50-5944-01	Inflammatory (Immune C3)
TCGA-RD-A8N1-01	IFN-gamma Dominant (Immune C2)
TCGA-BR-8687-01	Wound Healing (Immune C1)
TCGA-OR-A5JV-01	Immunologically Quiet (Immune C5)
TCGA-ED-A7PY-01	Inflammatory (Immune C3)
TCGA-EM-A2CO-01	Inflammatory (Immune C3)
TCGA-BR-A4IY-01	IFN-gamma Dominant (Immune C2)
TCGA-50-6673-01	TGF-beta Dominant (Immune C6)
TCGA-V1-A9OQ-01	Inflammatory (Immune C3)
TCGA-FG-A6IZ-01	Immunologically Quiet (Immune C5)
TCGA-C5-A1M5-01	IFN-gamma Dominant (Immune C2)
TCGA-DQ-7592-01	IFN-gamma Dominant (Immune C2)
TCGA-CR-7372-01	IFN-gamma Dominant (Immune C2)
TCGA-B5-A1N2-01	IFN-gamma Dominant (Immune C2)
TCGA-YL-A9WI-01	Lymphocyte Depleted (Immune C4)
TCGA-EM-A2OZ-01	Inflammatory (Immune C3)
TCGA-55-7727-01	IFN-gamma Dominant (Immune C2)
TCGA-QR-A6H0-01	Inflammatory (Immune C3)
TCGA-CS-4941-01	Lymphocyte Depleted (Immune C4)
TCGA-A1-A0SE-01	Wound Healing (Immune C1)
TCGA-OU-A5PI-01	Lymphocyte Depleted (Immune C4)
TCGA-A4-7996-01	Inflammatory (Immune C3)
TCGA-77-8153-01	Wound Healing (Immune C1)
TCGA-MS-A51U-01	TGF-beta Dominant (Immune C6)
TCGA-L5-A88Y-01	Inflammatory (Immune C3)
TCGA-FY-A3WA-01	Inflammatory (Immune C3)
TCGA-QS-A8F1-01	Inflammatory (Immune C3)
TCGA-G3-A25S-01	Lymphocyte Depleted (Immune C4)
TCGA-ER-A19K-01	Lymphocyte Depleted (Immune C4)
TCGA-EM-A1CS-01	Inflammatory (Immune C3)
TCGA-EL-A3ZM-01	IFN-gamma Dominant (Immune C2)
TCGA-DJ-A13X-01	Inflammatory (Immune C3)
TCGA-DX-A1L3-01	Inflammatory (Immune C3)
TCGA-2Z-A9JN-01	Inflammatory (Immune C3)
TCGA-AR-A1AM-01	Wound Healing (Immune C1)
TCGA-HT-8113-01	Lymphocyte Depleted (Immune C4)
TCGA-13-0890-01	IFN-gamma Dominant (Immune C2)
TCGA-VF-A8AE-01	IFN-gamma Dominant (Immune C2)
TCGA-DH-A7UT-01	Immunologically Quiet (Immune C5)
TCGA-D1-A16F-01	Wound Healing (Immune C1)
TCGA-CK-6751-01	Wound Healing (Immune C1)
TCGA-CV-7238-01	IFN-gamma Dominant (Immune C2)
TCGA-EL-A3T7-01	Inflammatory (Immune C3)
TCGA-SN-A6IS-01	IFN-gamma Dominant (Immune C2)
TCGA-B0-5075-01	Inflammatory (Immune C3)
TCGA-DU-5851-01	Immunologically Quiet (Immune C5)
TCGA-CN-5367-01	IFN-gamma Dominant (Immune C2)
TCGA-DX-A3LS-01	TGF-beta Dominant (Immune C6)
TCGA-86-8279-01	Wound Healing (Immune C1)
TCGA-W2-A7HB-01	Immunologically Quiet (Immune C5)
TCGA-E7-A6MD-01	Wound Healing (Immune C1)
TCGA-CR-5250-01	Inflammatory (Immune C3)
TCGA-B0-5100-01	Inflammatory (Immune C3)
TCGA-EJ-7218-01	Inflammatory (Immune C3)
TCGA-XK-AAJR-01	Inflammatory (Immune C3)
TCGA-55-A494-01	Inflammatory (Immune C3)
TCGA-BP-4775-01	Inflammatory (Immune C3)
TCGA-2G-AALF-01	Wound Healing (Immune C1)
TCGA-ET-A3BT-01	Inflammatory (Immune C3)
TCGA-61-2000-01	IFN-gamma Dominant (Immune C2)
TCGA-A4-7288-01	Inflammatory (Immune C3)
TCGA-BR-4369-01	Wound Healing (Immune C1)
TCGA-B0-5400-01	Inflammatory (Immune C3)
TCGA-G4-6317-01	Wound Healing (Immune C1)
TCGA-25-2404-01	IFN-gamma Dominant (Immune C2)
TCGA-CV-7437-01	Wound Healing (Immune C1)
TCGA-55-7913-01	Wound Healing (Immune C1)
TCGA-K7-A5RG-01	IFN-gamma Dominant (Immune C2)
TCGA-QR-A707-01	Lymphocyte Depleted (Immune C4)
TCGA-EY-A1GW-01	Lymphocyte Depleted (Immune C4)
TCGA-C5-A7X8-01	Wound Healing (Immune C1)
TCGA-B0-5120-01	Inflammatory (Immune C3)
TCGA-2G-AAKM-01	Wound Healing (Immune C1)
TCGA-SG-A6Z4-01	Lymphocyte Depleted (Immune C4)
TCGA-VD-AA8R-01	Immunologically Quiet (Immune C5)
TCGA-3B-A9HZ-01	Inflammatory (Immune C3)
TCGA-CJ-4873-01	Inflammatory (Immune C3)
TCGA-SX-A7SL-01	Lymphocyte Depleted (Immune C4)
TCGA-BH-A1EX-01	TGF-beta Dominant (Immune C6)
TCGA-HW-8321-01	Immunologically Quiet (Immune C5)
TCGA-G4-6309-01	Wound Healing (Immune C1)
TCGA-KL-8340-01	Inflammatory (Immune C3)
TCGA-EZ-7264-01	Immunologically Quiet (Immune C5)
TCGA-E8-A433-01	Inflammatory (Immune C3)
TCGA-EJ-7791-01	Inflammatory (Immune C3)
TCGA-IN-A6RR-01	IFN-gamma Dominant (Immune C2)
TCGA-55-8615-01	Inflammatory (Immune C3)
TCGA-HZ-A4BK-01	TGF-beta Dominant (Immune C6)
TCGA-EL-A3GQ-01	Inflammatory (Immune C3)
TCGA-BK-A26L-01	Wound Healing (Immune C1)
TCGA-VF-A8AA-01	IFN-gamma Dominant (Immune C2)
TCGA-G2-A2EO-01	Wound Healing (Immune C1)
TCGA-D6-A6EO-01	IFN-gamma Dominant (Immune C2)
TCGA-RC-A7SF-01	Inflammatory (Immune C3)
TCGA-EB-A24C-01	Lymphocyte Depleted (Immune C4)
TCGA-F1-A448-01	Wound Healing (Immune C1)
TCGA-A7-A0CJ-01	IFN-gamma Dominant (Immune C2)
TCGA-CS-6666-01	Lymphocyte Depleted (Immune C4)
TCGA-BP-4992-01	Inflammatory (Immune C3)
TCGA-CM-5868-01	Wound Healing (Immune C1)
TCGA-WC-A885-01	Lymphocyte Depleted (Immune C4)
TCGA-BR-A4IV-01	Inflammatory (Immune C3)
TCGA-HD-A4C1-01	IFN-gamma Dominant (Immune C2)
TCGA-P4-AAVO-01	Lymphocyte Depleted (Immune C4)
TCGA-NC-A5HK-01	IFN-gamma Dominant (Immune C2)
TCGA-VQ-A91Z-01	Wound Healing (Immune C1)
TCGA-DX-A8BR-01	Lymphocyte Depleted (Immune C4)
TCGA-W5-AA2X-01	Wound Healing (Immune C1)
TCGA-DH-A66D-01	Immunologically Quiet (Immune C5)
TCGA-IR-A3LH-01	IFN-gamma Dominant (Immune C2)
TCGA-KO-8410-01	Inflammatory (Immune C3)
TCGA-D1-A16R-01	Wound Healing (Immune C1)
TCGA-LN-A4A9-01	IFN-gamma Dominant (Immune C2)
TCGA-LL-A5YO-01	IFN-gamma Dominant (Immune C2)
TCGA-86-A4JF-01	IFN-gamma Dominant (Immune C2)
TCGA-DC-6156-01	TGF-beta Dominant (Immune C6)
TCGA-QU-A6IP-01	Inflammatory (Immune C3)
TCGA-FI-A3PV-01	Wound Healing (Immune C1)
TCGA-V1-A9O9-01	Inflammatory (Immune C3)
TCGA-EO-A2CG-01	Wound Healing (Immune C1)
TCGA-AN-A0FW-01	Wound Healing (Immune C1)
TCGA-VQ-A8PH-01	Wound Healing (Immune C1)
TCGA-AC-A6IX-01	Wound Healing (Immune C1)
TCGA-A5-A0GU-01	IFN-gamma Dominant (Immune C2)
TCGA-EB-A551-01	IFN-gamma Dominant (Immune C2)
TCGA-P5-A77W-01	Immunologically Quiet (Immune C5)
TCGA-HW-7491-01	Immunologically Quiet (Immune C5)
TCGA-EY-A1GS-01	Lymphocyte Depleted (Immune C4)
TCGA-AA-A010-01	Wound Healing (Immune C1)
TCGA-A3-3320-01	Inflammatory (Immune C3)
TCGA-FT-A3EE-01	Wound Healing (Immune C1)
TCGA-AA-3837-01	Wound Healing (Immune C1)
TCGA-L9-A443-01	Inflammatory (Immune C3)
TCGA-DJ-A2PN-01	Inflammatory (Immune C3)
TCGA-G3-A7M6-01	Inflammatory (Immune C3)
TCGA-E9-A1RG-01	Wound Healing (Immune C1)
TCGA-66-2767-01	IFN-gamma Dominant (Immune C2)
TCGA-MR-A520-01	Lymphocyte Depleted (Immune C4)
TCGA-FD-A3B7-01	IFN-gamma Dominant (Immune C2)
TCGA-E1-5307-01	Immunologically Quiet (Immune C5)
TCGA-78-8660-01	IFN-gamma Dominant (Immune C2)
TCGA-C5-A1M9-01	IFN-gamma Dominant (Immune C2)
TCGA-KL-8325-01	Immunologically Quiet (Immune C5)
TCGA-HW-7495-01	Immunologically Quiet (Immune C5)
TCGA-K4-A3WU-01	Inflammatory (Immune C3)
TCGA-AG-4021-01	Wound Healing (Immune C1)
TCGA-E2-A156-01	Inflammatory (Immune C3)
TCGA-CS-6669-01	Immunologically Quiet (Immune C5)
TCGA-EL-A3GW-01	Inflammatory (Immune C3)
TCGA-EM-A2CL-01	Inflammatory (Immune C3)
TCGA-CF-A47V-01	Lymphocyte Depleted (Immune C4)
TCGA-AR-A24R-01	IFN-gamma Dominant (Immune C2)
TCGA-BS-A0TE-01	IFN-gamma Dominant (Immune C2)
TCGA-HT-7481-01	Immunologically Quiet (Immune C5)
TCGA-BG-A0MU-01	Inflammatory (Immune C3)
TCGA-NC-A5HO-01	Wound Healing (Immune C1)
TCGA-EY-A1GD-01	Wound Healing (Immune C1)
TCGA-BF-A1PZ-01	IFN-gamma Dominant (Immune C2)
TCGA-XQ-A8TA-01	Lymphocyte Depleted (Immune C4)
TCGA-78-7148-01	Wound Healing (Immune C1)
TCGA-DU-8163-01	Immunologically Quiet (Immune C5)
TCGA-D8-A1JP-01	Wound Healing (Immune C1)
TCGA-T2-A6WZ-01	IFN-gamma Dominant (Immune C2)
TCGA-AP-A0LN-01	Wound Healing (Immune C1)
TCGA-AX-A06L-01	Wound Healing (Immune C1)
TCGA-AN-A0FS-01	Wound Healing (Immune C1)
TCGA-77-8154-01	Wound Healing (Immune C1)
TCGA-2G-AAFM-01	IFN-gamma Dominant (Immune C2)
TCGA-DJ-A3V5-01	Inflammatory (Immune C3)
TCGA-AC-A3TM-01	Wound Healing (Immune C1)
TCGA-DJ-A2Q3-01	Inflammatory (Immune C3)
TCGA-D6-8568-01	IFN-gamma Dominant (Immune C2)
TCGA-CV-7446-01	IFN-gamma Dominant (Immune C2)
TCGA-A5-A0GQ-01	IFN-gamma Dominant (Immune C2)
TCGA-DJ-A2PY-01	Inflammatory (Immune C3)
TCGA-DK-A3X1-01	Wound Healing (Immune C1)
TCGA-BG-A0MQ-01	Wound Healing (Immune C1)
TCGA-B9-A5W7-01	Inflammatory (Immune C3)
TCGA-C8-A12K-01	IFN-gamma Dominant (Immune C2)
TCGA-AR-A2LE-01	Inflammatory (Immune C3)
TCGA-AD-6964-01	IFN-gamma Dominant (Immune C2)
TCGA-37-A5EL-01	Wound Healing (Immune C1)
TCGA-26-1442-01	Immunologically Quiet (Immune C5)
TCGA-B0-4688-01	Lymphocyte Depleted (Immune C4)
TCGA-AA-3848-01	Wound Healing (Immune C1)
TCGA-BH-A0HK-01	Wound Healing (Immune C1)
TCGA-CJ-4899-01	Inflammatory (Immune C3)
TCGA-G4-6295-01	Wound Healing (Immune C1)
TCGA-RD-A8NB-01	IFN-gamma Dominant (Immune C2)
TCGA-B2-4101-01	Inflammatory (Immune C3)
TCGA-BQ-7048-01	Inflammatory (Immune C3)
TCGA-DG-A2KJ-01	IFN-gamma Dominant (Immune C2)
TCGA-55-A490-01	Wound Healing (Immune C1)
TCGA-4Z-AA81-01	IFN-gamma Dominant (Immune C2)
TCGA-D1-A16E-01	IFN-gamma Dominant (Immune C2)
TCGA-CF-A3MG-01	Wound Healing (Immune C1)
TCGA-QR-A708-01	Lymphocyte Depleted (Immune C4)
TCGA-CS-4942-01	Lymphocyte Depleted (Immune C4)
TCGA-BR-A4PE-01	IFN-gamma Dominant (Immune C2)
TCGA-NH-A50T-01	Wound Healing (Immune C1)
TCGA-FE-A237-01	Inflammatory (Immune C3)
TCGA-2G-AAFI-01	IFN-gamma Dominant (Immune C2)
TCGA-ZS-A9CE-01	Lymphocyte Depleted (Immune C4)
TCGA-AR-A250-01	Wound Healing (Immune C1)
TCGA-HC-7230-01	Inflammatory (Immune C3)
TCGA-S5-AA26-01	Wound Healing (Immune C1)
TCGA-HT-8110-01	Lymphocyte Depleted (Immune C4)
TCGA-D8-A1JG-01	IFN-gamma Dominant (Immune C2)
TCGA-KL-8337-01	Immunologically Quiet (Immune C5)
TCGA-ZF-A9R4-01	Lymphocyte Depleted (Immune C4)
TCGA-E2-A152-01	Wound Healing (Immune C1)
TCGA-GN-A26C-01	IFN-gamma Dominant (Immune C2)
TCGA-AR-A24V-01	IFN-gamma Dominant (Immune C2)
TCGA-85-8070-01	Wound Healing (Immune C1)
TCGA-BS-A0TA-01	IFN-gamma Dominant (Immune C2)
TCGA-A2-A0CR-01	TGF-beta Dominant (Immune C6)
TCGA-AK-3429-01	Inflammatory (Immune C3)
TCGA-PC-A5DL-01	TGF-beta Dominant (Immune C6)
TCGA-DX-A6BB-01	Lymphocyte Depleted (Immune C4)
TCGA-S9-A6U1-01	Immunologically Quiet (Immune C5)
TCGA-YC-A9TC-01	Wound Healing (Immune C1)
TCGA-BS-A0V4-01	Inflammatory (Immune C3)
TCGA-AN-A0FX-01	Wound Healing (Immune C1)
TCGA-Z6-A9VB-01	IFN-gamma Dominant (Immune C2)
TCGA-Q1-A5R3-01	IFN-gamma Dominant (Immune C2)
TCGA-AC-A62V-01	Wound Healing (Immune C1)
TCGA-CN-6988-01	Wound Healing (Immune C1)
TCGA-ET-A39O-01	Inflammatory (Immune C3)
TCGA-AP-A0LJ-01	Inflammatory (Immune C3)
TCGA-UB-AA0U-01	Inflammatory (Immune C3)
TCGA-A6-4107-01	Wound Healing (Immune C1)
TCGA-FK-A3S3-01	Inflammatory (Immune C3)
TCGA-FB-AAQ1-01	TGF-beta Dominant (Immune C6)
TCGA-AK-3455-01	IFN-gamma Dominant (Immune C2)
TCGA-HC-7211-01	Inflammatory (Immune C3)
TCGA-2Z-A9J3-01	Inflammatory (Immune C3)
TCGA-B2-3924-01	Inflammatory (Immune C3)
TCGA-GM-A3XN-01	Wound Healing (Immune C1)
TCGA-C8-A275-01	IFN-gamma Dominant (Immune C2)
TCGA-UD-AAC7-01	Wound Healing (Immune C1)
TCGA-4L-AA1F-01	Wound Healing (Immune C1)
TCGA-AK-3433-01	Inflammatory (Immune C3)
TCGA-DD-AAD8-01	Lymphocyte Depleted (Immune C4)
TCGA-AO-A129-01	IFN-gamma Dominant (Immune C2)
TCGA-P3-A6T3-01	IFN-gamma Dominant (Immune C2)
TCGA-R5-A7ZR-01	IFN-gamma Dominant (Immune C2)
TCGA-CV-A468-01	IFN-gamma Dominant (Immune C2)
TCGA-EJ-5516-01	Inflammatory (Immune C3)
TCGA-DX-A8BV-01	Lymphocyte Depleted (Immune C4)
TCGA-AO-A12E-01	Lymphocyte Depleted (Immune C4)
TCGA-VQ-A927-01	Wound Healing (Immune C1)
TCGA-YF-AA3L-01	Wound Healing (Immune C1)
TCGA-BP-4354-01	Lymphocyte Depleted (Immune C4)
TCGA-BR-8059-01	Wound Healing (Immune C1)
TCGA-EL-A3MZ-01	Inflammatory (Immune C3)
TCGA-BS-A0V8-01	Wound Healing (Immune C1)
TCGA-BH-A1F8-01	IFN-gamma Dominant (Immune C2)
TCGA-G3-AAV3-01	Inflammatory (Immune C3)
TCGA-QK-A6V9-01	IFN-gamma Dominant (Immune C2)
TCGA-A3-3306-01	Inflammatory (Immune C3)
TCGA-CC-A8HV-01	Lymphocyte Depleted (Immune C4)
TCGA-D8-A1JK-01	IFN-gamma Dominant (Immune C2)
TCGA-HC-A8D1-01	Inflammatory (Immune C3)
TCGA-ZF-A9R0-01	Wound Healing (Immune C1)
TCGA-RY-A840-01	Immunologically Quiet (Immune C5)
TCGA-A8-A08X-01	Wound Healing (Immune C1)
TCGA-EI-6882-01	Wound Healing (Immune C1)
TCGA-BP-4975-01	Inflammatory (Immune C3)
TCGA-AZ-4315-01	IFN-gamma Dominant (Immune C2)
TCGA-DD-AADO-01	IFN-gamma Dominant (Immune C2)
TCGA-3M-AB46-01	IFN-gamma Dominant (Immune C2)
TCGA-DX-A48R-01	Lymphocyte Depleted (Immune C4)
TCGA-VM-A8C9-01	Lymphocyte Depleted (Immune C4)
TCGA-EB-A85I-01	IFN-gamma Dominant (Immune C2)
TCGA-D6-A6EK-01	IFN-gamma Dominant (Immune C2)
TCGA-CJ-4869-01	Inflammatory (Immune C3)
TCGA-AA-3506-01	Wound Healing (Immune C1)
TCGA-3A-A9I9-01	Inflammatory (Immune C3)
TCGA-A4-8098-01	Lymphocyte Depleted (Immune C4)
TCGA-BR-4255-01	Wound Healing (Immune C1)
TCGA-F2-6879-01	IFN-gamma Dominant (Immune C2)
TCGA-IN-A7NT-01	IFN-gamma Dominant (Immune C2)
TCGA-29-1784-01	IFN-gamma Dominant (Immune C2)
TCGA-SR-A6MU-01	Lymphocyte Depleted (Immune C4)
TCGA-EB-A4OZ-01	IFN-gamma Dominant (Immune C2)
TCGA-J8-A3YD-01	Inflammatory (Immune C3)
TCGA-06-0743-01	Lymphocyte Depleted (Immune C4)
TCGA-D1-A16J-01	IFN-gamma Dominant (Immune C2)
TCGA-E9-A1R6-01	Wound Healing (Immune C1)
TCGA-R5-A7ZI-01	IFN-gamma Dominant (Immune C2)
TCGA-AJ-A3NC-01	Wound Healing (Immune C1)
TCGA-QR-A70K-01	Lymphocyte Depleted (Immune C4)
TCGA-G3-A25X-01	IFN-gamma Dominant (Immune C2)
TCGA-AP-A1DV-01	Wound Healing (Immune C1)
TCGA-BP-4983-01	IFN-gamma Dominant (Immune C2)
TCGA-B4-5378-01	Lymphocyte Depleted (Immune C4)
TCGA-BR-A4J6-01	Wound Healing (Immune C1)
TCGA-DQ-7591-01	IFN-gamma Dominant (Immune C2)
TCGA-A8-A09A-01	Inflammatory (Immune C3)
TCGA-G3-A3CK-01	Lymphocyte Depleted (Immune C4)
TCGA-BR-6801-01	Wound Healing (Immune C1)
TCGA-F9-A4JJ-01	Inflammatory (Immune C3)
TCGA-IQ-A61I-01	IFN-gamma Dominant (Immune C2)
TCGA-5P-A9JZ-01	Lymphocyte Depleted (Immune C4)
TCGA-HD-A6I0-01	IFN-gamma Dominant (Immune C2)
TCGA-WC-A87W-01	Inflammatory (Immune C3)
TCGA-EM-A3AR-01	Inflammatory (Immune C3)
TCGA-A4-A5Y0-01	Lymphocyte Depleted (Immune C4)
TCGA-57-1582-01	Wound Healing (Immune C1)
TCGA-HB-A3L4-01	Wound Healing (Immune C1)
TCGA-3A-A9IB-01	Wound Healing (Immune C1)
TCGA-G7-6792-01	Inflammatory (Immune C3)
TCGA-BD-A2L6-01	Lymphocyte Depleted (Immune C4)
TCGA-B2-5639-01	Inflammatory (Immune C3)
TCGA-GK-A6C7-01	Inflammatory (Immune C3)
TCGA-EL-A4K7-01	Inflammatory (Immune C3)
TCGA-ZG-A9LY-01	Inflammatory (Immune C3)
TCGA-DJ-A1QI-01	Inflammatory (Immune C3)
TCGA-B5-A1MW-01	IFN-gamma Dominant (Immune C2)
TCGA-DJ-A2PQ-01	Inflammatory (Immune C3)
TCGA-OR-A5KO-01	Lymphocyte Depleted (Immune C4)
TCGA-A8-A08O-01	Wound Healing (Immune C1)
TCGA-EM-A22M-01	Inflammatory (Immune C3)
TCGA-AA-A01C-01	Wound Healing (Immune C1)
TCGA-V4-A9ES-01	Lymphocyte Depleted (Immune C4)
TCGA-CV-7422-01	IFN-gamma Dominant (Immune C2)
TCGA-HT-7482-01	Immunologically Quiet (Immune C5)
TCGA-CV-6962-01	Wound Healing (Immune C1)
TCGA-EA-A50E-01	IFN-gamma Dominant (Immune C2)
TCGA-21-1082-01	Wound Healing (Immune C1)
TCGA-A2-A4RY-01	Inflammatory (Immune C3)
TCGA-QH-A6CW-01	Immunologically Quiet (Immune C5)
TCGA-UF-A7JT-01	IFN-gamma Dominant (Immune C2)
TCGA-HC-7737-01	Inflammatory (Immune C3)
TCGA-AL-3466-01	Inflammatory (Immune C3)
TCGA-R5-A805-01	IFN-gamma Dominant (Immune C2)
TCGA-A2-A0SY-01	Inflammatory (Immune C3)
TCGA-D1-A0ZQ-01	Wound Healing (Immune C1)
TCGA-AC-A8OP-01	Inflammatory (Immune C3)
TCGA-98-A53J-01	Wound Healing (Immune C1)
TCGA-VP-A87B-01	Inflammatory (Immune C3)
TCGA-DU-A7T8-01	Lymphocyte Depleted (Immune C4)
TCGA-AO-A126-01	Wound Healing (Immune C1)
TCGA-EM-A4FF-01	Inflammatory (Immune C3)
TCGA-CJ-4878-01	Inflammatory (Immune C3)
TCGA-CH-5792-01	Inflammatory (Immune C3)
TCGA-DD-A11D-01	Lymphocyte Depleted (Immune C4)
TCGA-AO-A0J6-01	IFN-gamma Dominant (Immune C2)
TCGA-DU-5870-01	Immunologically Quiet (Immune C5)
TCGA-24-2033-01	Lymphocyte Depleted (Immune C4)
TCGA-D5-5539-01	Wound Healing (Immune C1)
TCGA-DD-AACK-01	Lymphocyte Depleted (Immune C4)
TCGA-D8-A27F-01	Wound Healing (Immune C1)
TCGA-AP-A1DR-01	Wound Healing (Immune C1)
TCGA-56-7579-01	Lymphocyte Depleted (Immune C4)
TCGA-EA-A556-01	IFN-gamma Dominant (Immune C2)
TCGA-MJ-A68J-01	Inflammatory (Immune C3)
TCGA-DD-A118-01	Inflammatory (Immune C3)
TCGA-VS-A9V3-01	IFN-gamma Dominant (Immune C2)
TCGA-44-6774-01	Wound Healing (Immune C1)
TCGA-KD-A5QS-01	Lymphocyte Depleted (Immune C4)
TCGA-BQ-7061-01	Inflammatory (Immune C3)
TCGA-A5-A3LP-01	Wound Healing (Immune C1)
TCGA-25-1627-01	Wound Healing (Immune C1)
TCGA-63-A5MJ-01	IFN-gamma Dominant (Immune C2)
TCGA-EW-A2FV-01	IFN-gamma Dominant (Immune C2)
TCGA-V4-A9E8-01	Inflammatory (Immune C3)
TCGA-TP-A8TV-01	Inflammatory (Immune C3)
TCGA-AY-6386-01	Wound Healing (Immune C1)
TCGA-D7-A74A-01	Wound Healing (Immune C1)
TCGA-TM-A84S-01	Immunologically Quiet (Immune C5)
TCGA-B0-4701-01	Inflammatory (Immune C3)
TCGA-33-4538-01	Wound Healing (Immune C1)
TCGA-26-5136-01	Lymphocyte Depleted (Immune C4)
TCGA-GU-A42P-01	Wound Healing (Immune C1)
TCGA-B0-4698-01	IFN-gamma Dominant (Immune C2)
TCGA-CS-4943-01	Lymphocyte Depleted (Immune C4)
TCGA-G7-6796-01	Inflammatory (Immune C3)
TCGA-AA-3855-01	Wound Healing (Immune C1)
TCGA-E9-A54X-01	Lymphocyte Depleted (Immune C4)
TCGA-AX-A2HJ-01	Wound Healing (Immune C1)
TCGA-AO-A0JB-01	Wound Healing (Immune C1)
TCGA-2F-A9KP-01	Wound Healing (Immune C1)
TCGA-A2-A1G1-01	IFN-gamma Dominant (Immune C2)
TCGA-AC-A3W5-01	Wound Healing (Immune C1)
TCGA-A6-5661-01	Wound Healing (Immune C1)
TCGA-DJ-A1QF-01	Inflammatory (Immune C3)
TCGA-N8-A4PO-01	Wound Healing (Immune C1)
TCGA-KL-8338-01	Inflammatory (Immune C3)
TCGA-LN-A4A2-01	Wound Healing (Immune C1)
TCGA-J4-A83N-01	Inflammatory (Immune C3)
TCGA-WB-A80K-01	Inflammatory (Immune C3)
TCGA-CA-5797-01	Wound Healing (Immune C1)
TCGA-B5-A11M-01	Inflammatory (Immune C3)
TCGA-A7-A13G-01	Inflammatory (Immune C3)
TCGA-AA-3514-01	Wound Healing (Immune C1)
TCGA-V4-A9EW-01	Inflammatory (Immune C3)
TCGA-2G-AALY-01	Wound Healing (Immune C1)
TCGA-14-1034-01	Lymphocyte Depleted (Immune C4)
TCGA-E2-A1IH-01	Wound Healing (Immune C1)
TCGA-BR-A4IU-01	Inflammatory (Immune C3)
TCGA-VS-A9UH-01	IFN-gamma Dominant (Immune C2)
TCGA-B0-4691-01	IFN-gamma Dominant (Immune C2)
TCGA-CN-A6V3-01	IFN-gamma Dominant (Immune C2)
TCGA-G3-AAV7-01	Lymphocyte Depleted (Immune C4)
TCGA-CU-A3QU-01	Lymphocyte Depleted (Immune C4)
TCGA-D1-A17U-01	Wound Healing (Immune C1)
TCGA-BG-A0VW-01	Wound Healing (Immune C1)
TCGA-AC-A3EH-01	Wound Healing (Immune C1)
TCGA-12-3652-01	Lymphocyte Depleted (Immune C4)
TCGA-A3-A6NN-01	Inflammatory (Immune C3)
TCGA-D8-A1Y1-01	Lymphocyte Depleted (Immune C4)
TCGA-UD-AAC1-01	Wound Healing (Immune C1)
TCGA-BR-8677-01	IFN-gamma Dominant (Immune C2)
TCGA-AO-A03V-01	Wound Healing (Immune C1)
TCGA-RY-A845-01	Immunologically Quiet (Immune C5)
TCGA-CJ-5689-01	Inflammatory (Immune C3)
TCGA-DK-AA6Q-01	IFN-gamma Dominant (Immune C2)
TCGA-DD-A4NI-01	Inflammatory (Immune C3)
TCGA-EY-A1GP-01	IFN-gamma Dominant (Immune C2)
TCGA-EJ-5515-01	Inflammatory (Immune C3)
TCGA-76-4927-01	Lymphocyte Depleted (Immune C4)
TCGA-FG-8182-01	Immunologically Quiet (Immune C5)
TCGA-UF-A7JC-01	IFN-gamma Dominant (Immune C2)
TCGA-CN-5373-01	IFN-gamma Dominant (Immune C2)
TCGA-E3-A3DZ-01	Inflammatory (Immune C3)
TCGA-26-5132-01	Lymphocyte Depleted (Immune C4)
TCGA-A3-3363-01	Lymphocyte Depleted (Immune C4)
TCGA-BH-A0DD-01	IFN-gamma Dominant (Immune C2)
TCGA-X6-A8C4-01	Lymphocyte Depleted (Immune C4)
TCGA-VS-A9UD-01	IFN-gamma Dominant (Immune C2)
TCGA-JX-A3PZ-01	Wound Healing (Immune C1)
TCGA-BP-4325-01	Inflammatory (Immune C3)
TCGA-DD-AADL-01	Lymphocyte Depleted (Immune C4)
TCGA-BT-A20P-01	Wound Healing (Immune C1)
TCGA-FB-AAPZ-01	Inflammatory (Immune C3)
TCGA-98-A53A-01	Wound Healing (Immune C1)
TCGA-EU-5905-01	Inflammatory (Immune C3)
TCGA-CZ-5985-01	Inflammatory (Immune C3)
TCGA-N9-A4Q4-01	Wound Healing (Immune C1)
TCGA-WR-A838-01	IFN-gamma Dominant (Immune C2)
TCGA-B5-A11I-01	IFN-gamma Dominant (Immune C2)
TCGA-V1-A8WV-01	Inflammatory (Immune C3)
TCGA-D7-6525-01	IFN-gamma Dominant (Immune C2)
TCGA-91-8497-01	Inflammatory (Immune C3)
TCGA-A5-A7WJ-01	IFN-gamma Dominant (Immune C2)
TCGA-ZF-A9RN-01	IFN-gamma Dominant (Immune C2)
TCGA-NC-A5HL-01	IFN-gamma Dominant (Immune C2)
TCGA-L3-A524-01	Wound Healing (Immune C1)
TCGA-C5-A1MP-01	IFN-gamma Dominant (Immune C2)
TCGA-BR-A4J1-01	Wound Healing (Immune C1)
TCGA-CC-A5UD-01	Lymphocyte Depleted (Immune C4)
TCGA-IN-A6RO-01	IFN-gamma Dominant (Immune C2)
TCGA-B7-A5TK-01	IFN-gamma Dominant (Immune C2)
TCGA-E6-A2P8-01	Wound Healing (Immune C1)
TCGA-AJ-A23O-01	IFN-gamma Dominant (Immune C2)
TCGA-X6-A7WD-01	Lymphocyte Depleted (Immune C4)
TCGA-56-8307-01	IFN-gamma Dominant (Immune C2)
TCGA-A2-A0EN-01	Inflammatory (Immune C3)
TCGA-GV-A3QI-01	Lymphocyte Depleted (Immune C4)
TCGA-W5-AA2H-01	IFN-gamma Dominant (Immune C2)
TCGA-DX-A6YX-01	Lymphocyte Depleted (Immune C4)
TCGA-3X-AAVB-01	Wound Healing (Immune C1)
TCGA-FB-AAPU-01	Wound Healing (Immune C1)
TCGA-VQ-A8PO-01	IFN-gamma Dominant (Immune C2)
TCGA-DD-AAE6-01	Lymphocyte Depleted (Immune C4)
TCGA-J1-A4AH-01	Wound Healing (Immune C1)
TCGA-GU-A42R-01	Wound Healing (Immune C1)
TCGA-B0-5081-01	Inflammatory (Immune C3)
TCGA-33-AASL-01	IFN-gamma Dominant (Immune C2)
TCGA-CW-5587-01	Inflammatory (Immune C3)
TCGA-CG-4301-01	IFN-gamma Dominant (Immune C2)
TCGA-BA-5149-01	IFN-gamma Dominant (Immune C2)
TCGA-FG-6688-01	Lymphocyte Depleted (Immune C4)
TCGA-H9-7775-01	Inflammatory (Immune C3)
TCGA-E9-A1R2-01	IFN-gamma Dominant (Immune C2)
TCGA-62-A470-01	Lymphocyte Depleted (Immune C4)
TCGA-A8-A08L-01	Wound Healing (Immune C1)
TCGA-A7-A3RF-01	Lymphocyte Depleted (Immune C4)
TCGA-53-A4EZ-01	IFN-gamma Dominant (Immune C2)
TCGA-78-7162-01	Inflammatory (Immune C3)
TCGA-IG-A51D-01	IFN-gamma Dominant (Immune C2)
TCGA-FD-A5BU-01	IFN-gamma Dominant (Immune C2)
TCGA-68-8251-01	Wound Healing (Immune C1)
TCGA-BG-A2AD-01	Wound Healing (Immune C1)
TCGA-B0-4847-01	Inflammatory (Immune C3)
TCGA-RS-A6TO-01	IFN-gamma Dominant (Immune C2)
TCGA-MQ-A4LC-01	IFN-gamma Dominant (Immune C2)
TCGA-F4-6808-01	Wound Healing (Immune C1)
TCGA-76-4932-01	Lymphocyte Depleted (Immune C4)
TCGA-A2-A0D4-01	Wound Healing (Immune C1)
TCGA-DI-A1NN-01	IFN-gamma Dominant (Immune C2)
TCGA-HT-7689-01	Immunologically Quiet (Immune C5)
TCGA-EW-A1IW-01	Wound Healing (Immune C1)
TCGA-VQ-A94P-01	Inflammatory (Immune C3)
TCGA-CV-6003-01	IFN-gamma Dominant (Immune C2)
TCGA-AG-3909-01	Wound Healing (Immune C1)
TCGA-21-1081-01	Wound Healing (Immune C1)
TCGA-AO-A03M-01	IFN-gamma Dominant (Immune C2)
TCGA-D7-6521-01	Wound Healing (Immune C1)
TCGA-58-8391-01	Wound Healing (Immune C1)
TCGA-HF-A5NB-01	IFN-gamma Dominant (Immune C2)
TCGA-B6-A0IQ-01	Wound Healing (Immune C1)
TCGA-62-8398-01	Wound Healing (Immune C1)
TCGA-BH-A1FG-01	IFN-gamma Dominant (Immune C2)
TCGA-AR-A0TS-01	IFN-gamma Dominant (Immune C2)
TCGA-66-2754-01	Wound Healing (Immune C1)
TCGA-CJ-5686-01	Inflammatory (Immune C3)
TCGA-A2-A0CM-01	IFN-gamma Dominant (Immune C2)
TCGA-FD-A3NA-01	IFN-gamma Dominant (Immune C2)
TCGA-85-A4QQ-01	Wound Healing (Immune C1)
TCGA-E2-A15I-01	Inflammatory (Immune C3)
TCGA-A8-A06X-01	IFN-gamma Dominant (Immune C2)
TCGA-KF-A41W-01	Wound Healing (Immune C1)
TCGA-FG-7638-01	Immunologically Quiet (Immune C5)
TCGA-IB-AAUN-01	Wound Healing (Immune C1)
TCGA-UD-AAC4-01	Wound Healing (Immune C1)
TCGA-KB-A93J-01	IFN-gamma Dominant (Immune C2)
TCGA-49-AAR4-01	IFN-gamma Dominant (Immune C2)
TCGA-29-1763-01	IFN-gamma Dominant (Immune C2)
TCGA-22-4601-01	Wound Healing (Immune C1)
TCGA-DU-7013-01	Lymphocyte Depleted (Immune C4)
TCGA-ET-A40Q-01	Inflammatory (Immune C3)
TCGA-EB-A3Y6-01	Wound Healing (Immune C1)
TCGA-63-A5MB-01	Wound Healing (Immune C1)
TCGA-VN-A88Q-01	Inflammatory (Immune C3)
TCGA-OR-A5JP-01	Lymphocyte Depleted (Immune C4)
TCGA-QF-A5YT-01	Wound Healing (Immune C1)
TCGA-BP-5001-01	Inflammatory (Immune C3)
TCGA-A6-5662-01	Wound Healing (Immune C1)
TCGA-G9-6348-01	Wound Healing (Immune C1)
TCGA-32-1970-01	Lymphocyte Depleted (Immune C4)
TCGA-61-2111-01	IFN-gamma Dominant (Immune C2)
TCGA-BP-4968-01	Inflammatory (Immune C3)
TCGA-DK-AA76-01	Lymphocyte Depleted (Immune C4)
TCGA-DJ-A3V4-01	Inflammatory (Immune C3)
TCGA-L5-A4OO-01	IFN-gamma Dominant (Immune C2)
TCGA-2A-A8VL-01	Inflammatory (Immune C3)
TCGA-V1-A9ZK-01	Inflammatory (Immune C3)
TCGA-43-5670-01	IFN-gamma Dominant (Immune C2)
TCGA-B0-4838-01	Inflammatory (Immune C3)
TCGA-62-A46Y-01	IFN-gamma Dominant (Immune C2)
TCGA-AA-3489-01	Wound Healing (Immune C1)
TCGA-MU-A5YI-01	IFN-gamma Dominant (Immune C2)
TCGA-BQ-5882-01	Inflammatory (Immune C3)
TCGA-66-2758-01	IFN-gamma Dominant (Immune C2)
TCGA-DK-A1AA-01	Wound Healing (Immune C1)
TCGA-DJ-A4UQ-01	Inflammatory (Immune C3)
TCGA-CH-5765-01	Inflammatory (Immune C3)
TCGA-A2-A0CZ-01	Inflammatory (Immune C3)
TCGA-B3-3926-01	Inflammatory (Immune C3)
TCGA-AF-2687-01	Wound Healing (Immune C1)
TCGA-E1-A7Z3-01	Immunologically Quiet (Immune C5)
TCGA-VS-A8QA-01	IFN-gamma Dominant (Immune C2)
TCGA-DD-AAD3-01	Inflammatory (Immune C3)
TCGA-AN-A0XS-01	Inflammatory (Immune C3)
TCGA-G9-6377-01	Wound Healing (Immune C1)
TCGA-DD-A39V-01	IFN-gamma Dominant (Immune C2)
TCGA-AG-A016-01	Wound Healing (Immune C1)
TCGA-EJ-5511-01	Inflammatory (Immune C3)
TCGA-A2-A04Q-01	IFN-gamma Dominant (Immune C2)
TCGA-WA-A7GZ-01	IFN-gamma Dominant (Immune C2)
TCGA-HT-7476-01	Lymphocyte Depleted (Immune C4)
TCGA-AZ-6599-01	Lymphocyte Depleted (Immune C4)
TCGA-BR-8381-01	IFN-gamma Dominant (Immune C2)
TCGA-K1-A3PN-01	Wound Healing (Immune C1)
TCGA-ED-A97K-01	Inflammatory (Immune C3)
TCGA-2G-AAGV-01	Wound Healing (Immune C1)
TCGA-CH-5788-01	Lymphocyte Depleted (Immune C4)
TCGA-HZ-A9TJ-01	Wound Healing (Immune C1)
TCGA-TQ-A7RG-01	Immunologically Quiet (Immune C5)
TCGA-D1-A15X-01	IFN-gamma Dominant (Immune C2)
TCGA-94-7557-01	Wound Healing (Immune C1)
TCGA-CN-5374-01	IFN-gamma Dominant (Immune C2)
TCGA-G4-6299-01	IFN-gamma Dominant (Immune C2)
TCGA-98-7454-01	IFN-gamma Dominant (Immune C2)
TCGA-DM-A1D8-01	Wound Healing (Immune C1)
TCGA-E2-A109-01	IFN-gamma Dominant (Immune C2)
TCGA-G9-6336-01	Inflammatory (Immune C3)
TCGA-V1-A8MG-01	Inflammatory (Immune C3)
TCGA-AC-A5XS-01	IFN-gamma Dominant (Immune C2)
TCGA-FD-A6TF-01	Wound Healing (Immune C1)
TCGA-AX-A064-01	Wound Healing (Immune C1)
TCGA-FG-8181-01	Immunologically Quiet (Immune C5)
TCGA-13-1410-01	IFN-gamma Dominant (Immune C2)
TCGA-B6-A1KF-01	Wound Healing (Immune C1)
TCGA-BT-A20W-01	Wound Healing (Immune C1)
TCGA-BH-A1FL-01	Inflammatory (Immune C3)
TCGA-IQ-A6SG-01	Wound Healing (Immune C1)
TCGA-B2-A4SR-01	Inflammatory (Immune C3)
TCGA-E9-A1NI-01	IFN-gamma Dominant (Immune C2)
TCGA-33-A5GW-01	Wound Healing (Immune C1)
TCGA-A5-A0R8-01	IFN-gamma Dominant (Immune C2)
TCGA-EM-A1YA-01	Inflammatory (Immune C3)
TCGA-DU-A7T6-01	Lymphocyte Depleted (Immune C4)
TCGA-YU-A90S-01	IFN-gamma Dominant (Immune C2)
TCGA-BC-A69H-01	Lymphocyte Depleted (Immune C4)
TCGA-24-1553-01	IFN-gamma Dominant (Immune C2)
TCGA-DB-A4XC-01	Immunologically Quiet (Immune C5)
TCGA-XE-AAOD-01	IFN-gamma Dominant (Immune C2)
TCGA-A8-A07R-01	IFN-gamma Dominant (Immune C2)
TCGA-62-A46R-01	IFN-gamma Dominant (Immune C2)
TCGA-CJ-4903-01	Inflammatory (Immune C3)
TCGA-EP-A2KA-01	IFN-gamma Dominant (Immune C2)
TCGA-AN-A03Y-01	Wound Healing (Immune C1)
TCGA-A2-A0T7-01	Wound Healing (Immune C1)
TCGA-B5-A3FA-01	IFN-gamma Dominant (Immune C2)
TCGA-EL-A3CL-01	Inflammatory (Immune C3)
TCGA-A2-A0CV-01	Inflammatory (Immune C3)
TCGA-63-A5MV-01	Wound Healing (Immune C1)
TCGA-DX-AB2E-01	Wound Healing (Immune C1)
TCGA-GU-A767-01	IFN-gamma Dominant (Immune C2)
TCGA-DD-AAE2-01	Inflammatory (Immune C3)
TCGA-FG-A4MW-01	Lymphocyte Depleted (Immune C4)
TCGA-BR-6456-01	IFN-gamma Dominant (Immune C2)
TCGA-CC-A5UC-01	Wound Healing (Immune C1)
TCGA-B1-A657-01	Inflammatory (Immune C3)
TCGA-BH-A1FH-01	Wound Healing (Immune C1)
TCGA-F9-A8NY-01	Inflammatory (Immune C3)
TCGA-29-1710-01	IFN-gamma Dominant (Immune C2)
TCGA-W2-A7HD-01	Lymphocyte Depleted (Immune C4)
TCGA-55-6712-01	Inflammatory (Immune C3)
TCGA-2G-AAH2-01	IFN-gamma Dominant (Immune C2)
TCGA-BP-5189-01	Inflammatory (Immune C3)
TCGA-HT-7467-01	Immunologically Quiet (Immune C5)
TCGA-CN-4731-01	IFN-gamma Dominant (Immune C2)
TCGA-D7-A6EV-01	Wound Healing (Immune C1)
TCGA-HC-7818-01	Inflammatory (Immune C3)
TCGA-L5-A8NT-01	Wound Healing (Immune C1)
TCGA-C5-A2M2-01	Lymphocyte Depleted (Immune C4)
TCGA-CJ-4881-01	Inflammatory (Immune C3)
TCGA-3X-AAVA-01	Inflammatory (Immune C3)
TCGA-QR-A70C-01	Inflammatory (Immune C3)
TCGA-IG-A3YA-01	Wound Healing (Immune C1)
TCGA-HZ-A49H-01	Inflammatory (Immune C3)
TCGA-KR-A7K8-01	Inflammatory (Immune C3)
TCGA-EJ-5497-01	Inflammatory (Immune C3)
TCGA-AN-A0XN-01	TGF-beta Dominant (Immune C6)
TCGA-A1-A0SK-01	Wound Healing (Immune C1)
TCGA-BP-4807-01	Inflammatory (Immune C3)
TCGA-AO-A125-01	Inflammatory (Immune C3)
TCGA-XF-A9T5-01	IFN-gamma Dominant (Immune C2)
TCGA-B8-A54G-01	Inflammatory (Immune C3)
TCGA-06-0219-01	Lymphocyte Depleted (Immune C4)
TCGA-PE-A5DC-01	IFN-gamma Dominant (Immune C2)
TCGA-AD-5900-01	IFN-gamma Dominant (Immune C2)
TCGA-EO-A1Y5-01	IFN-gamma Dominant (Immune C2)
TCGA-DH-5142-01	Immunologically Quiet (Immune C5)
TCGA-05-4244-01	Lymphocyte Depleted (Immune C4)
TCGA-AX-A060-01	Wound Healing (Immune C1)
TCGA-XF-A8HE-01	IFN-gamma Dominant (Immune C2)
TCGA-BH-A0AU-01	IFN-gamma Dominant (Immune C2)
TCGA-AK-3450-01	Inflammatory (Immune C3)
TCGA-14-0787-01	Lymphocyte Depleted (Immune C4)
TCGA-E3-A3E0-01	Inflammatory (Immune C3)
TCGA-AF-3400-01	Lymphocyte Depleted (Immune C4)
TCGA-BQ-5890-01	Lymphocyte Depleted (Immune C4)
TCGA-S9-A6U2-01	Immunologically Quiet (Immune C5)
TCGA-L5-A8NW-01	IFN-gamma Dominant (Immune C2)
TCGA-IA-A83T-01	Inflammatory (Immune C3)
TCGA-DX-A1KU-01	TGF-beta Dominant (Immune C6)
TCGA-GC-A3RB-01	IFN-gamma Dominant (Immune C2)
TCGA-S6-A8JW-01	IFN-gamma Dominant (Immune C2)
TCGA-CC-A7IE-01	IFN-gamma Dominant (Immune C2)
TCGA-SU-A7E7-01	Inflammatory (Immune C3)
TCGA-12-0618-01	Lymphocyte Depleted (Immune C4)
TCGA-BJ-A28X-01	Inflammatory (Immune C3)
TCGA-L9-A8F4-01	IFN-gamma Dominant (Immune C2)
TCGA-G7-6795-01	Inflammatory (Immune C3)
TCGA-H5-A2HR-01	IFN-gamma Dominant (Immune C2)
TCGA-B0-4811-01	Inflammatory (Immune C3)
TCGA-27-2524-01	Lymphocyte Depleted (Immune C4)
TCGA-GM-A2DB-01	IFN-gamma Dominant (Immune C2)
TCGA-EC-A1NJ-01	IFN-gamma Dominant (Immune C2)
TCGA-VN-A88N-01	Inflammatory (Immune C3)
TCGA-RD-A8N0-01	IFN-gamma Dominant (Immune C2)
TCGA-TQ-A7RH-01	Immunologically Quiet (Immune C5)
TCGA-L5-A4OI-01	Lymphocyte Depleted (Immune C4)
TCGA-B8-5550-01	Inflammatory (Immune C3)
TCGA-N8-A4PL-01	Wound Healing (Immune C1)
TCGA-4R-AA8I-01	Lymphocyte Depleted (Immune C4)
TCGA-VF-A8A8-01	Wound Healing (Immune C1)
TCGA-E9-A244-01	Wound Healing (Immune C1)
TCGA-CG-4442-01	Wound Healing (Immune C1)
TCGA-S7-A7X0-01	Inflammatory (Immune C3)
TCGA-DQ-7593-01	IFN-gamma Dominant (Immune C2)
TCGA-A8-A0AB-01	Wound Healing (Immune C1)
TCGA-55-7726-01	Wound Healing (Immune C1)
TCGA-2E-A9G8-01	IFN-gamma Dominant (Immune C2)
TCGA-A2-A3XV-01	Wound Healing (Immune C1)
TCGA-KV-A74V-01	Inflammatory (Immune C3)
TCGA-A6-5666-01	Wound Healing (Immune C1)
TCGA-08-0386-01	Lymphocyte Depleted (Immune C4)
TCGA-BP-5194-01	Inflammatory (Immune C3)
TCGA-CN-4735-01	IFN-gamma Dominant (Immune C2)
TCGA-91-6849-01	Inflammatory (Immune C3)
TCGA-G9-6356-01	Inflammatory (Immune C3)
TCGA-49-4512-01	TGF-beta Dominant (Immune C6)
TCGA-OR-A5JO-01	Inflammatory (Immune C3)
TCGA-FU-A5XV-01	IFN-gamma Dominant (Immune C2)
TCGA-QR-A70U-01	Lymphocyte Depleted (Immune C4)
TCGA-DB-A75M-01	Immunologically Quiet (Immune C5)
TCGA-DM-A1D7-01	Wound Healing (Immune C1)
TCGA-AN-A04A-01	Wound Healing (Immune C1)
TCGA-HT-8012-01	Immunologically Quiet (Immune C5)
TCGA-AA-A022-01	IFN-gamma Dominant (Immune C2)
TCGA-EX-A8YF-01	IFN-gamma Dominant (Immune C2)
TCGA-EM-A22P-01	Inflammatory (Immune C3)
TCGA-TS-A7OU-01	Lymphocyte Depleted (Immune C4)
TCGA-E2-A14O-01	Wound Healing (Immune C1)
TCGA-A7-A0D9-01	Wound Healing (Immune C1)
TCGA-S9-A7QW-01	Immunologically Quiet (Immune C5)
TCGA-BF-AAOX-01	Wound Healing (Immune C1)
TCGA-P5-A733-01	Immunologically Quiet (Immune C5)
TCGA-66-2770-01	Wound Healing (Immune C1)
TCGA-ED-A7PX-01	Wound Healing (Immune C1)
TCGA-2J-AABK-01	IFN-gamma Dominant (Immune C2)
TCGA-EM-A2CK-01	Inflammatory (Immune C3)
TCGA-2Z-A9JO-01	Lymphocyte Depleted (Immune C4)
TCGA-24-1567-01	Wound Healing (Immune C1)
TCGA-B8-4154-01	Inflammatory (Immune C3)
TCGA-AO-A0JJ-01	TGF-beta Dominant (Immune C6)
TCGA-AA-A02Y-01	Wound Healing (Immune C1)
TCGA-CJ-4890-01	Inflammatory (Immune C3)
TCGA-DX-A240-01	Wound Healing (Immune C1)
TCGA-MX-A666-01	Wound Healing (Immune C1)
TCGA-3A-A9J0-01	Wound Healing (Immune C1)
TCGA-34-5241-01	IFN-gamma Dominant (Immune C2)
TCGA-E1-A7Z4-01	Immunologically Quiet (Immune C5)
TCGA-DU-A5TR-01	Lymphocyte Depleted (Immune C4)
TCGA-75-6203-01	Inflammatory (Immune C3)
TCGA-77-8133-01	IFN-gamma Dominant (Immune C2)
TCGA-28-5204-01	Lymphocyte Depleted (Immune C4)
TCGA-EL-A3H1-01	Inflammatory (Immune C3)
TCGA-36-1577-01	Wound Healing (Immune C1)
TCGA-AG-3887-01	Wound Healing (Immune C1)
TCGA-ZH-A8Y4-01	Lymphocyte Depleted (Immune C4)
TCGA-43-6647-01	Wound Healing (Immune C1)
TCGA-CD-5800-01	IFN-gamma Dominant (Immune C2)
TCGA-SW-A7EA-01	IFN-gamma Dominant (Immune C2)
TCGA-GL-A9DC-01	Inflammatory (Immune C3)
TCGA-ZJ-A8QR-01	IFN-gamma Dominant (Immune C2)
TCGA-V7-A7HQ-01	Wound Healing (Immune C1)
TCGA-AN-A046-01	IFN-gamma Dominant (Immune C2)
TCGA-09-0367-01	Lymphocyte Depleted (Immune C4)
TCGA-FG-8185-01	Immunologically Quiet (Immune C5)
TCGA-BK-A4ZD-01	Lymphocyte Depleted (Immune C4)
TCGA-N5-A4R8-01	Wound Healing (Immune C1)
TCGA-VR-A8ER-01	Wound Healing (Immune C1)
TCGA-FX-A8OO-01	Wound Healing (Immune C1)
TCGA-KS-A41F-01	Inflammatory (Immune C3)
TCGA-XF-AAME-01	Wound Healing (Immune C1)
TCGA-KO-8411-01	Immunologically Quiet (Immune C5)
TCGA-OR-A5JX-01	Inflammatory (Immune C3)
TCGA-73-A9RS-01	Wound Healing (Immune C1)
TCGA-CJ-4893-01	Inflammatory (Immune C3)
TCGA-A3-3329-01	Inflammatory (Immune C3)
TCGA-HW-8320-01	Immunologically Quiet (Immune C5)
TCGA-HZ-A77P-01	Inflammatory (Immune C3)
TCGA-MP-A4TD-01	Inflammatory (Immune C3)
TCGA-EW-A3U0-01	IFN-gamma Dominant (Immune C2)
TCGA-A6-2683-01	Lymphocyte Depleted (Immune C4)
TCGA-EL-A3H5-01	Inflammatory (Immune C3)
TCGA-IA-A40Y-01	Lymphocyte Depleted (Immune C4)
TCGA-FD-A6TE-01	Wound Healing (Immune C1)
TCGA-2A-A8VV-01	Wound Healing (Immune C1)
TCGA-R6-A8W5-01	Wound Healing (Immune C1)
TCGA-UZ-A9PP-01	Inflammatory (Immune C3)
TCGA-L7-A56G-01	Wound Healing (Immune C1)
TCGA-Y8-A898-01	Lymphocyte Depleted (Immune C4)
TCGA-DF-A2KY-01	IFN-gamma Dominant (Immune C2)
TCGA-RW-A67W-01	Lymphocyte Depleted (Immune C4)
TCGA-NJ-A4YG-01	Inflammatory (Immune C3)
TCGA-AO-A0JF-01	Inflammatory (Immune C3)
TCGA-A2-A0T0-01	Wound Healing (Immune C1)
TCGA-BH-A0EA-01	Inflammatory (Immune C3)
TCGA-BT-A20O-01	IFN-gamma Dominant (Immune C2)
TCGA-CS-6667-01	Immunologically Quiet (Immune C5)
TCGA-75-5147-01	IFN-gamma Dominant (Immune C2)
TCGA-KV-A6GE-01	Inflammatory (Immune C3)
TCGA-E2-A572-01	Lymphocyte Depleted (Immune C4)
TCGA-DU-5849-01	Immunologically Quiet (Immune C5)
TCGA-56-7731-01	Wound Healing (Immune C1)
TCGA-61-1740-01	IFN-gamma Dominant (Immune C2)
TCGA-63-A5MN-01	TGF-beta Dominant (Immune C6)
TCGA-DB-5279-01	Immunologically Quiet (Immune C5)
TCGA-D8-A147-01	IFN-gamma Dominant (Immune C2)
TCGA-44-7671-01	Inflammatory (Immune C3)
TCGA-F6-A8O3-01	Immunologically Quiet (Immune C5)
TCGA-LL-A5YN-01	IFN-gamma Dominant (Immune C2)
TCGA-MI-A75C-01	Lymphocyte Depleted (Immune C4)
TCGA-AK-3458-01	IFN-gamma Dominant (Immune C2)
TCGA-NA-A4QV-01	Wound Healing (Immune C1)
TCGA-V5-A7RB-01	IFN-gamma Dominant (Immune C2)
TCGA-DQ-5630-01	IFN-gamma Dominant (Immune C2)
TCGA-06-0190-01	Lymphocyte Depleted (Immune C4)
TCGA-E2-A1LE-01	Wound Healing (Immune C1)
TCGA-38-4631-01	IFN-gamma Dominant (Immune C2)
TCGA-A3-3358-01	Inflammatory (Immune C3)
TCGA-CM-6676-01	Wound Healing (Immune C1)
TCGA-L5-A8NS-01	Wound Healing (Immune C1)
TCGA-CJ-4882-01	Inflammatory (Immune C3)
TCGA-IR-A3LB-01	IFN-gamma Dominant (Immune C2)
TCGA-F1-6177-01	IFN-gamma Dominant (Immune C2)
TCGA-EY-A4KR-01	IFN-gamma Dominant (Immune C2)
TCGA-AG-3878-01	Inflammatory (Immune C3)
TCGA-IB-AAUQ-01	IFN-gamma Dominant (Immune C2)
TCGA-HC-A9TH-01	IFN-gamma Dominant (Immune C2)
TCGA-C8-A26Y-01	Wound Healing (Immune C1)
TCGA-MZ-A7D7-01	IFN-gamma Dominant (Immune C2)
TCGA-D7-8570-01	IFN-gamma Dominant (Immune C2)
TCGA-CV-A6JT-01	IFN-gamma Dominant (Immune C2)
TCGA-B0-4833-01	Inflammatory (Immune C3)
TCGA-NC-A5HF-01	Wound Healing (Immune C1)
TCGA-G4-6626-01	Wound Healing (Immune C1)
TCGA-SR-A6MS-01	Lymphocyte Depleted (Immune C4)
[truncated: 7,128 more rows]

## Sheet: Table S9
Table S9: UMAP clustering and cellular annotation results
ID	UMAP	CellAnn
HCC1_COL1_ROW1	13	NK cells
HCC1_COL1_ROW2	0	Hepatocytes
HCC1_COL1_ROW3	0	Hepatocytes
HCC1_COL1_ROW4	0	Hepatocytes
HCC1_COL1_ROW5	0	Hepatocytes
HCC1_COL1_ROW6	0	Hepatocytes
HCC1_COL1_ROW7	0	Hepatocytes
HCC1_COL1_ROW8	0	Hepatocytes
HCC1_COL1_ROW9	0	Hepatocytes
HCC1_COL1_ROW10	0	Hepatocytes
HCC1_COL1_ROW11	0	Hepatocytes
HCC1_COL1_ROW12	0	Hepatocytes
HCC1_COL1_ROW13	0	Hepatocytes
HCC1_COL1_ROW14	0	Hepatocytes
HCC1_COL1_ROW15	0	Hepatocytes
HCC1_COL1_ROW16	11	Hepatocytes
HCC1_COL1_ROW17	0	Hepatocytes
HCC1_COL1_ROW18	0	Hepatocytes
HCC1_COL1_ROW19	0	Hepatocytes
HCC1_COL1_ROW20	0	Hepatocytes
HCC1_COL1_ROW21	0	Hepatocytes
HCC1_COL1_ROW22	11	Hepatocytes
HCC1_COL1_ROW23	0	Hepatocytes
HCC1_COL1_ROW24	0	Hepatocytes
HCC1_COL1_ROW25	0	Hepatocytes
HCC1_COL1_ROW26	0	Hepatocytes
HCC1_COL1_ROW27	11	Hepatocytes
HCC1_COL1_ROW28	0	Hepatocytes
HCC1_COL1_ROW29	0	Hepatocytes
HCC1_COL1_ROW30	0	Hepatocytes
HCC1_COL1_ROW31	6	Macrophages
HCC1_COL1_ROW32	0	Hepatocytes
HCC1_COL1_ROW33	0	Hepatocytes
HCC1_COL1_ROW34	0	Hepatocytes
HCC1_COL1_ROW35	0	Hepatocytes
HCC1_COL1_ROW36	0	Hepatocytes
HCC1_COL1_ROW37	0	Hepatocytes
HCC1_COL1_ROW38	0	Hepatocytes
HCC1_COL1_ROW39	0	Hepatocytes
HCC1_COL1_ROW40	0	Hepatocytes
HCC1_COL2_ROW1	11	Hepatocytes
HCC1_COL2_ROW2	0	Hepatocytes
HCC1_COL2_ROW3	0	Hepatocytes
HCC1_COL2_ROW4	0	Hepatocytes
HCC1_COL2_ROW5	0	Hepatocytes
HCC1_COL2_ROW6	0	Hepatocytes
HCC1_COL2_ROW7	0	Hepatocytes
HCC1_COL2_ROW8	0	Hepatocytes
HCC1_COL2_ROW9	0	Hepatocytes
HCC1_COL2_ROW10	0	Hepatocytes
HCC1_COL2_ROW11	0	Hepatocytes
HCC1_COL2_ROW12	11	Hepatocytes
HCC1_COL2_ROW13	3	Hepatocytes
HCC1_COL2_ROW14	0	Hepatocytes
HCC1_COL2_ROW15	0	Hepatocytes
HCC1_COL2_ROW16	0	Hepatocytes
HCC1_COL2_ROW17	6	Macrophages
HCC1_COL2_ROW18	0	Hepatocytes
HCC1_COL2_ROW19	0	Hepatocytes
HCC1_COL2_ROW20	0	Hepatocytes
HCC1_COL2_ROW21	0	Hepatocytes
HCC1_COL2_ROW22	6	Macrophages
HCC1_COL2_ROW23	0	Hepatocytes
HCC1_COL2_ROW24	0	Hepatocytes
HCC1_COL2_ROW25	0	Hepatocytes
HCC1_COL2_ROW26	0	Hepatocytes
HCC1_COL2_ROW27	0	Hepatocytes
HCC1_COL2_ROW28	0	Hepatocytes
HCC1_COL2_ROW29	0	Hepatocytes
HCC1_COL2_ROW30	0	Hepatocytes
HCC1_COL2_ROW31	11	Hepatocytes
HCC1_COL2_ROW32	0	Hepatocytes
HCC1_COL2_ROW33	0	Hepatocytes
HCC1_COL2_ROW34	0	Hepatocytes
HCC1_COL2_ROW35	0	Hepatocytes
HCC1_COL2_ROW36	0	Hepatocytes
HCC1_COL2_ROW37	0	Hepatocytes
HCC1_COL2_ROW38	0	Hepatocytes
HCC1_COL2_ROW39	0	Hepatocytes
HCC1_COL2_ROW40	0	Hepatocytes
HCC1_COL3_ROW1	0	Hepatocytes
HCC1_COL3_ROW2	11	Hepatocytes
HCC1_COL3_ROW3	0	Hepatocytes
HCC1_COL3_ROW4	0	Hepatocytes
HCC1_COL3_ROW5	0	Hepatocytes
HCC1_COL3_ROW6	0	Hepatocytes
HCC1_COL3_ROW7	0	Hepatocytes
HCC1_COL3_ROW8	0	Hepatocytes
HCC1_COL3_ROW9	0	Hepatocytes
HCC1_COL3_ROW10	0	Hepatocytes
HCC1_COL3_ROW11	0	Hepatocytes
HCC1_COL3_ROW12	0	Hepatocytes
HCC1_COL3_ROW13	0	Hepatocytes
HCC1_COL3_ROW14	0	Hepatocytes
HCC1_COL3_ROW15	0	Hepatocytes
HCC1_COL3_ROW16	0	Hepatocytes
HCC1_COL3_ROW17	0	Hepatocytes
HCC1_COL3_ROW18	0	Hepatocytes
HCC1_COL3_ROW19	11	Hepatocytes
HCC1_COL3_ROW20	0	Hepatocytes
HCC1_COL3_ROW21	0	Hepatocytes
HCC1_COL3_ROW22	0	Hepatocytes
HCC1_COL3_ROW23	0	Hepatocytes
HCC1_COL3_ROW24	0	Hepatocytes
HCC1_COL3_ROW25	0	Hepatocytes
HCC1_COL3_ROW26	0	Hepatocytes
HCC1_COL3_ROW27	0	Hepatocytes
HCC1_COL3_ROW28	0	Hepatocytes
HCC1_COL3_ROW29	0	Hepatocytes
HCC1_COL3_ROW30	0	Hepatocytes
HCC1_COL3_ROW31	0	Hepatocytes
HCC1_COL3_ROW32	0	Hepatocytes
HCC1_COL3_ROW33	0	Hepatocytes
HCC1_COL3_ROW34	6	Macrophages
HCC1_COL3_ROW35	0	Hepatocytes
HCC1_COL3_ROW36	0	Hepatocytes
HCC1_COL3_ROW37	0	Hepatocytes
HCC1_COL3_ROW38	0	Hepatocytes
HCC1_COL3_ROW39	0	Hepatocytes
HCC1_COL3_ROW40	0	Hepatocytes
HCC1_COL4_ROW1	0	Hepatocytes
HCC1_COL4_ROW2	0	Hepatocytes
HCC1_COL4_ROW3	0	Hepatocytes
HCC1_COL4_ROW4	0	Hepatocytes
HCC1_COL4_ROW5	0	Hepatocytes
HCC1_COL4_ROW6	11	Hepatocytes
HCC1_COL4_ROW7	0	Hepatocytes
HCC1_COL4_ROW8	0	Hepatocytes
HCC1_COL4_ROW9	0	Hepatocytes
HCC1_COL4_ROW10	6	Macrophages
HCC1_COL4_ROW11	0	Hepatocytes
HCC1_COL4_ROW12	0	Hepatocytes
HCC1_COL4_ROW13	6	Macrophages
HCC1_COL4_ROW14	0	Hepatocytes
HCC1_COL4_ROW15	0	Hepatocytes
HCC1_COL4_ROW16	0	Hepatocytes
HCC1_COL4_ROW17	0	Hepatocytes
HCC1_COL4_ROW18	11	Hepatocytes
HCC1_COL4_ROW19	0	Hepatocytes
HCC1_COL4_ROW20	0	Hepatocytes
HCC1_COL4_ROW21	0	Hepatocytes
HCC1_COL4_ROW22	0	Hepatocytes
HCC1_COL4_ROW23	0	Hepatocytes
HCC1_COL4_ROW24	0	Hepatocytes
HCC1_COL4_ROW25	0	Hepatocytes
HCC1_COL4_ROW26	0	Hepatocytes
HCC1_COL4_ROW27	0	Hepatocytes
HCC1_COL4_ROW28	0	Hepatocytes
HCC1_COL4_ROW29	0	Hepatocytes
HCC1_COL4_ROW30	0	Hepatocytes
HCC1_COL4_ROW31	0	Hepatocytes
HCC1_COL4_ROW32	0	Hepatocytes
HCC1_COL4_ROW33	0	Hepatocytes
HCC1_COL4_ROW34	0	Hepatocytes
HCC1_COL4_ROW35	11	Hepatocytes
HCC1_COL4_ROW36	0	Hepatocytes
HCC1_COL4_ROW37	0	Hepatocytes
HCC1_COL4_ROW38	0	Hepatocytes
HCC1_COL4_ROW39	0	Hepatocytes
HCC1_COL4_ROW40	0	Hepatocytes
HCC1_COL5_ROW1	6	Macrophages
HCC1_COL5_ROW2	6	Macrophages
HCC1_COL5_ROW3	11	Hepatocytes
HCC1_COL5_ROW4	11	Hepatocytes
HCC1_COL5_ROW5	0	Hepatocytes
HCC1_COL5_ROW6	0	Hepatocytes
HCC1_COL5_ROW7	0	Hepatocytes
HCC1_COL5_ROW8	0	Hepatocytes
HCC1_COL5_ROW9	0	Hepatocytes
HCC1_COL5_ROW10	0	Hepatocytes
HCC1_COL5_ROW11	0	Hepatocytes
HCC1_COL5_ROW12	0	Hepatocytes
HCC1_COL5_ROW13	0	Hepatocytes
HCC1_COL5_ROW14	0	Hepatocytes
HCC1_COL5_ROW15	0	Hepatocytes
HCC1_COL5_ROW16	0	Hepatocytes
HCC1_COL5_ROW17	0	Hepatocytes
HCC1_COL5_ROW18	0	Hepatocytes
HCC1_COL5_ROW19	0	Hepatocytes
HCC1_COL5_ROW20	0	Hepatocytes
HCC1_COL5_ROW21	11	Hepatocytes
HCC1_COL5_ROW22	0	Hepatocytes
HCC1_COL5_ROW23	11	Hepatocytes
HCC1_COL5_ROW24	0	Hepatocytes
HCC1_COL5_ROW25	0	Hepatocytes
HCC1_COL5_ROW26	0	Hepatocytes
HCC1_COL5_ROW27	0	Hepatocytes
HCC1_COL5_ROW28	0	Hepatocytes
HCC1_COL5_ROW29	0	Hepatocytes
HCC1_COL5_ROW30	0	Hepatocytes
HCC1_COL5_ROW31	0	Hepatocytes
HCC1_COL5_ROW32	0	Hepatocytes
HCC1_COL5_ROW33	0	Hepatocytes
HCC1_COL5_ROW34	0	Hepatocytes
HCC1_COL5_ROW35	0	Hepatocytes
HCC1_COL5_ROW36	0	Hepatocytes
HCC1_COL5_ROW37	0	Hepatocytes
HCC1_COL5_ROW38	11	Hepatocytes
HCC1_COL5_ROW39	11	Hepatocytes
HCC1_COL5_ROW40	11	Hepatocytes
HCC1_COL6_ROW1	0	Hepatocytes
HCC1_COL6_ROW2	0	Hepatocytes
HCC1_COL6_ROW3	0	Hepatocytes
HCC1_COL6_ROW4	0	Hepatocytes
HCC1_COL6_ROW5	0	Hepatocytes
HCC1_COL6_ROW6	0	Hepatocytes
HCC1_COL6_ROW7	0	Hepatocytes
HCC1_COL6_ROW8	0	Hepatocytes
HCC1_COL6_ROW9	0	Hepatocytes
HCC1_COL6_ROW10	0	Hepatocytes
HCC1_COL6_ROW11	0	Hepatocytes
HCC1_COL6_ROW12	0	Hepatocytes
HCC1_COL6_ROW13	11	Hepatocytes
HCC1_COL6_ROW14	0	Hepatocytes
HCC1_COL6_ROW15	0	Hepatocytes
HCC1_COL6_ROW16	0	Hepatocytes
HCC1_COL6_ROW17	0	Hepatocytes
HCC1_COL6_ROW18	0	Hepatocytes
HCC1_COL6_ROW19	0	Hepatocytes
HCC1_COL6_ROW20	0	Hepatocytes
HCC1_COL6_ROW21	0	Hepatocytes
HCC1_COL6_ROW22	0	Hepatocytes
HCC1_COL6_ROW23	11	Hepatocytes
HCC1_COL6_ROW24	0	Hepatocytes
HCC1_COL6_ROW25	9	Hepatocytes
HCC1_COL6_ROW26	0	Hepatocytes
HCC1_COL6_ROW27	11	Hepatocytes
HCC1_COL6_ROW28	0	Hepatocytes
HCC1_COL6_ROW29	11	Hepatocytes
HCC1_COL6_ROW30	0	Hepatocytes
HCC1_COL6_ROW31	0	Hepatocytes
HCC1_COL6_ROW32	0	Hepatocytes
HCC1_COL6_ROW33	0	Hepatocytes
HCC1_COL6_ROW34	0	Hepatocytes
HCC1_COL6_ROW35	6	Macrophages
HCC1_COL6_ROW36	0	Hepatocytes
HCC1_COL6_ROW37	11	Hepatocytes
HCC1_COL6_ROW38	0	Hepatocytes
HCC1_COL6_ROW39	0	Hepatocytes
HCC1_COL6_ROW40	0	Hepatocytes
HCC1_COL7_ROW1	0	Hepatocytes
HCC1_COL7_ROW2	0	Hepatocytes
HCC1_COL7_ROW3	0	Hepatocytes
HCC1_COL7_ROW4	0	Hepatocytes
HCC1_COL7_ROW5	0	Hepatocytes
HCC1_COL7_ROW6	0	Hepatocytes
HCC1_COL7_ROW7	0	Hepatocytes
HCC1_COL7_ROW8	11	Hepatocytes
HCC1_COL7_ROW9	0	Hepatocytes
HCC1_COL7_ROW10	11	Hepatocytes
HCC1_COL7_ROW11	0	Hepatocytes
HCC1_COL7_ROW12	0	Hepatocytes
HCC1_COL7_ROW13	0	Hepatocytes
HCC1_COL7_ROW14	0	Hepatocytes
HCC1_COL7_ROW15	11	Hepatocytes
HCC1_COL7_ROW16	0	Hepatocytes
HCC1_COL7_ROW17	0	Hepatocytes
HCC1_COL7_ROW18	0	Hepatocytes
HCC1_COL7_ROW19	0	Hepatocytes
HCC1_COL7_ROW20	0	Hepatocytes
HCC1_COL7_ROW21	0	Hepatocytes
HCC1_COL7_ROW22	0	Hepatocytes
HCC1_COL7_ROW23	0	Hepatocytes
HCC1_COL7_ROW24	0	Hepatocytes
HCC1_COL7_ROW25	11	Hepatocytes
HCC1_COL7_ROW26	0	Hepatocytes
HCC1_COL7_ROW27	3	Hepatocytes
HCC1_COL7_ROW28	0	Hepatocytes
HCC1_COL7_ROW29	0	Hepatocytes
HCC1_COL7_ROW30	0	Hepatocytes
HCC1_COL7_ROW31	0	Hepatocytes
HCC1_COL7_ROW32	0	Hepatocytes
HCC1_COL7_ROW33	0	Hepatocytes
HCC1_COL7_ROW34	0	Hepatocytes
HCC1_COL7_ROW35	0	Hepatocytes
HCC1_COL7_ROW36	0	Hepatocytes
HCC1_COL7_ROW37	0	Hepatocytes
HCC1_COL7_ROW38	0	Hepatocytes
HCC1_COL7_ROW39	0	Hepatocytes
HCC1_COL7_ROW40	0	Hepatocytes
HCC1_COL8_ROW1	0	Hepatocytes
HCC1_COL8_ROW2	0	Hepatocytes
HCC1_COL8_ROW3	0	Hepatocytes
HCC1_COL8_ROW4	0	Hepatocytes
HCC1_COL8_ROW5	0	Hepatocytes
HCC1_COL8_ROW6	0	Hepatocytes
HCC1_COL8_ROW7	0	Hepatocytes
HCC1_COL8_ROW8	0	Hepatocytes
HCC1_COL8_ROW9	11	Hepatocytes
HCC1_COL8_ROW10	11	Hepatocytes
HCC1_COL8_ROW11	0	Hepatocytes
HCC1_COL8_ROW12	0	Hepatocytes
HCC1_COL8_ROW13	0	Hepatocytes
HCC1_COL8_ROW14	0	Hepatocytes
HCC1_COL8_ROW15	0	Hepatocytes
HCC1_COL8_ROW16	11	Hepatocytes
HCC1_COL8_ROW17	0	Hepatocytes
HCC1_COL8_ROW18	0	Hepatocytes
HCC1_COL8_ROW19	0	Hepatocytes
HCC1_COL8_ROW20	0	Hepatocytes
HCC1_COL8_ROW21	0	Hepatocytes
HCC1_COL8_ROW22	0	Hepatocytes
HCC1_COL8_ROW23	0	Hepatocytes
HCC1_COL8_ROW24	5	CD8+ T cells
HCC1_COL8_ROW25	0	Hepatocytes
HCC1_COL8_ROW26	6	Macrophages
HCC1_COL8_ROW27	0	Hepatocytes
HCC1_COL8_ROW28	0	Hepatocytes
HCC1_COL8_ROW29	6	Macrophages
HCC1_COL8_ROW30	0	Hepatocytes
HCC1_COL8_ROW31	0	Hepatocytes
HCC1_COL8_ROW32	9	Hepatocytes
HCC1_COL8_ROW33	0	Hepatocytes
HCC1_COL8_ROW34	0	Hepatocytes
HCC1_COL8_ROW35	0	Hepatocytes
HCC1_COL8_ROW36	0	Hepatocytes
HCC1_COL8_ROW37	0	Hepatocytes
HCC1_COL8_ROW38	0	Hepatocytes
HCC1_COL8_ROW39	0	Hepatocytes
HCC1_COL8_ROW40	0	Hepatocytes
HCC1_COL9_ROW1	0	Hepatocytes
HCC1_COL9_ROW2	0	Hepatocytes
HCC1_COL9_ROW3	0	Hepatocytes
HCC1_COL9_ROW4	0	Hepatocytes
HCC1_COL9_ROW5	0	Hepatocytes
HCC1_COL9_ROW6	0	Hepatocytes
HCC1_COL9_ROW7	0	Hepatocytes
HCC1_COL9_ROW8	0	Hepatocytes
HCC1_COL9_ROW9	0	Hepatocytes
HCC1_COL9_ROW10	0	Hepatocytes
HCC1_COL9_ROW11	0	Hepatocytes
HCC1_COL9_ROW12	11	Hepatocytes
HCC1_COL9_ROW13	0	Hepatocytes
HCC1_COL9_ROW14	0	Hepatocytes
HCC1_COL9_ROW15	0	Hepatocytes
HCC1_COL9_ROW16	0	Hepatocytes
HCC1_COL9_ROW17	0	Hepatocytes
HCC1_COL9_ROW18	0	Hepatocytes
HCC1_COL9_ROW19	0	Hepatocytes
HCC1_COL9_ROW20	0	Hepatocytes
HCC1_COL9_ROW21	0	Hepatocytes
HCC1_COL9_ROW22	0	Hepatocytes
HCC1_COL9_ROW23	0	Hepatocytes
HCC1_COL9_ROW24	0	Hepatocytes
HCC1_COL9_ROW25	0	Hepatocytes
HCC1_COL9_ROW26	0	Hepatocytes
HCC1_COL9_ROW27	9	Hepatocytes
HCC1_COL9_ROW28	0	Hepatocytes
HCC1_COL9_ROW29	0	Hepatocytes
HCC1_COL9_ROW30	0	Hepatocytes
HCC1_COL9_ROW31	0	Hepatocytes
HCC1_COL9_ROW32	0	Hepatocytes
HCC1_COL9_ROW33	0	Hepatocytes
HCC1_COL9_ROW34	0	Hepatocytes
HCC1_COL9_ROW35	0	Hepatocytes
HCC1_COL9_ROW36	0	Hepatocytes
HCC1_COL9_ROW37	0	Hepatocytes
HCC1_COL9_ROW38	0	Hepatocytes
HCC1_COL9_ROW39	6	Macrophages
HCC1_COL9_ROW40	0	Hepatocytes
HCC1_COL10_ROW1	0	Hepatocytes
HCC1_COL10_ROW2	0	Hepatocytes
HCC1_COL10_ROW3	3	Hepatocytes
HCC1_COL10_ROW4	0	Hepatocytes
HCC1_COL10_ROW5	0	Hepatocytes
HCC1_COL10_ROW6	0	Hepatocytes
HCC1_COL10_ROW7	0	Hepatocytes
HCC1_COL10_ROW8	0	Hepatocytes
HCC1_COL10_ROW9	0	Hepatocytes
HCC1_COL10_ROW10	0	Hepatocytes
HCC1_COL10_ROW11	0	Hepatocytes
HCC1_COL10_ROW12	0	Hepatocytes
HCC1_COL10_ROW13	0	Hepatocytes
HCC1_COL10_ROW14	5	CD8+ T cells
HCC1_COL10_ROW15	3	Hepatocytes
HCC1_COL10_ROW16	0	Hepatocytes
HCC1_COL10_ROW17	0	Hepatocytes
HCC1_COL10_ROW18	0	Hepatocytes
HCC1_COL10_ROW19	0	Hepatocytes
HCC1_COL10_ROW20	0	Hepatocytes
HCC1_COL10_ROW21	0	Hepatocytes
HCC1_COL10_ROW22	0	Hepatocytes
HCC1_COL10_ROW23	0	Hepatocytes
HCC1_COL10_ROW24	0	Hepatocytes
HCC1_COL10_ROW25	0	Hepatocytes
HCC1_COL10_ROW26	0	Hepatocytes
HCC1_COL10_ROW27	0	Hepatocytes
HCC1_COL10_ROW28	0	Hepatocytes
HCC1_COL10_ROW29	0	Hepatocytes
HCC1_COL10_ROW30	0	Hepatocytes
HCC1_COL10_ROW31	0	Hepatocytes
HCC1_COL10_ROW32	0	Hepatocytes
HCC1_COL10_ROW33	0	Hepatocytes
HCC1_COL10_ROW34	0	Hepatocytes
HCC1_COL10_ROW35	0	Hepatocytes
HCC1_COL10_ROW36	0	Hepatocytes
HCC1_COL10_ROW37	0	Hepatocytes
HCC1_COL10_ROW38	0	Hepatocytes
HCC1_COL10_ROW39	0	Hepatocytes
HCC1_COL10_ROW40	0	Hepatocytes
HCC1_COL11_ROW1	11	Hepatocytes
HCC1_COL11_ROW2	0	Hepatocytes
HCC1_COL11_ROW3	0	Hepatocytes
HCC1_COL11_ROW4	0	Hepatocytes
HCC1_COL11_ROW5	0	Hepatocytes
HCC1_COL11_ROW6	0	Hepatocytes
HCC1_COL11_ROW7	10	CD8+ T cells
HCC1_COL11_ROW8	0	Hepatocytes
HCC1_COL11_ROW9	0	Hepatocytes
HCC1_COL11_ROW10	0	Hepatocytes
HCC1_COL11_ROW11	0	Hepatocytes
HCC1_COL11_ROW12	0	Hepatocytes
HCC1_COL11_ROW13	0	Hepatocytes
HCC1_COL11_ROW14	6	Macrophages
HCC1_COL11_ROW15	0	Hepatocytes
HCC1_COL11_ROW16	0	Hepatocytes
HCC1_COL11_ROW17	0	Hepatocytes
HCC1_COL11_ROW18	0	Hepatocytes
HCC1_COL11_ROW19	0	Hepatocytes
HCC1_COL11_ROW20	0	Hepatocytes
HCC1_COL11_ROW21	0	Hepatocytes
HCC1_COL11_ROW22	0	Hepatocytes
HCC1_COL11_ROW23	0	Hepatocytes
HCC1_COL11_ROW24	0	Hepatocytes
HCC1_COL11_ROW25	0	Hepatocytes
HCC1_COL11_ROW26	0	Hepatocytes
HCC1_COL11_ROW27	0	Hepatocytes
HCC1_COL11_ROW28	0	Hepatocytes
HCC1_COL11_ROW29	0	Hepatocytes
HCC1_COL11_ROW30	0	Hepatocytes
HCC1_COL11_ROW31	0	Hepatocytes
HCC1_COL11_ROW32	0	Hepatocytes
HCC1_COL11_ROW33	0	Hepatocytes
HCC1_COL11_ROW34	0	Hepatocytes
HCC1_COL11_ROW35	9	Hepatocytes
HCC1_COL11_ROW36	0	Hepatocytes
HCC1_COL11_ROW37	0	Hepatocytes
HCC1_COL11_ROW38	0	Hepatocytes
HCC1_COL11_ROW39	0	Hepatocytes
HCC1_COL11_ROW40	0	Hepatocytes
HCC1_COL12_ROW1	0	Hepatocytes
HCC1_COL12_ROW2	0	Hepatocytes
HCC1_COL12_ROW3	0	Hepatocytes
HCC1_COL12_ROW4	0	Hepatocytes
HCC1_COL12_ROW5	0	Hepatocytes
HCC1_COL12_ROW6	0	Hepatocytes
HCC1_COL12_ROW7	0	Hepatocytes
HCC1_COL12_ROW8	0	Hepatocytes
HCC1_COL12_ROW9	0	Hepatocytes
HCC1_COL12_ROW10	0	Hepatocytes
HCC1_COL12_ROW11	0	Hepatocytes
HCC1_COL12_ROW12	0	Hepatocytes
HCC1_COL12_ROW13	0	Hepatocytes
HCC1_COL12_ROW14	0	Hepatocytes
HCC1_COL12_ROW15	0	Hepatocytes
HCC1_COL12_ROW16	0	Hepatocytes
HCC1_COL12_ROW17	0	Hepatocytes
HCC1_COL12_ROW18	0	Hepatocytes
HCC1_COL12_ROW19	0	Hepatocytes
HCC1_COL12_ROW20	0	Hepatocytes
HCC1_COL12_ROW21	0	Hepatocytes
HCC1_COL12_ROW22	0	Hepatocytes
HCC1_COL12_ROW23	0	Hepatocytes
HCC1_COL12_ROW24	0	Hepatocytes
HCC1_COL12_ROW25	0	Hepatocytes
HCC1_COL12_ROW26	0	Hepatocytes
HCC1_COL12_ROW27	0	Hepatocytes
HCC1_COL12_ROW28	0	Hepatocytes
HCC1_COL12_ROW29	0	Hepatocytes
HCC1_COL12_ROW30	0	Hepatocytes
HCC1_COL12_ROW31	0	Hepatocytes
HCC1_COL12_ROW32	0	Hepatocytes
HCC1_COL12_ROW33	0	Hepatocytes
HCC1_COL12_ROW34	11	Hepatocytes
HCC1_COL12_ROW35	0	Hepatocytes
HCC1_COL12_ROW36	0	Hepatocytes
HCC1_COL12_ROW37	0	Hepatocytes
HCC1_COL12_ROW38	0	Hepatocytes
HCC1_COL12_ROW39	11	Hepatocytes
HCC1_COL12_ROW40	0	Hepatocytes
HCC1_COL13_ROW1	0	Hepatocytes
HCC1_COL13_ROW2	11	Hepatocytes
HCC1_COL13_ROW3	6	Macrophages
HCC1_COL13_ROW4	0	Hepatocytes
HCC1_COL13_ROW5	11	Hepatocytes
HCC1_COL13_ROW6	0	Hepatocytes
HCC1_COL13_ROW7	0	Hepatocytes
HCC1_COL13_ROW8	0	Hepatocytes
HCC1_COL13_ROW9	0	Hepatocytes
HCC1_COL13_ROW10	0	Hepatocytes
HCC1_COL13_ROW11	0	Hepatocytes
HCC1_COL13_ROW12	0	Hepatocytes
HCC1_COL13_ROW13	0	Hepatocytes
HCC1_COL13_ROW14	11	Hepatocytes
HCC1_COL13_ROW15	6	Macrophages
HCC1_COL13_ROW16	0	Hepatocytes
HCC1_COL13_ROW17	0	Hepatocytes
HCC1_COL13_ROW18	6	Macrophages
HCC1_COL13_ROW19	0	Hepatocytes
HCC1_COL13_ROW20	0	Hepatocytes
HCC1_COL13_ROW21	0	Hepatocytes
HCC1_COL13_ROW22	0	Hepatocytes
HCC1_COL13_ROW23	0	Hepatocytes
HCC1_COL13_ROW24	0	Hepatocytes
HCC1_COL13_ROW25	0	Hepatocytes
HCC1_COL13_ROW26	0	Hepatocytes
HCC1_COL13_ROW27	0	Hepatocytes
HCC1_COL13_ROW28	0	Hepatocytes
HCC1_COL13_ROW29	0	Hepatocytes
HCC1_COL13_ROW30	0	Hepatocytes
HCC1_COL13_ROW31	8	Hepatocytes
HCC1_COL13_ROW32	0	Hepatocytes
HCC1_COL13_ROW33	0	Hepatocytes
HCC1_COL13_ROW34	0	Hepatocytes
HCC1_COL13_ROW35	0	Hepatocytes
HCC1_COL13_ROW36	0	Hepatocytes
HCC1_COL13_ROW37	6	Macrophages
HCC1_COL13_ROW38	6	Macrophages
HCC1_COL13_ROW39	0	Hepatocytes
HCC1_COL13_ROW40	0	Hepatocytes
HCC1_COL14_ROW1	0	Hepatocytes
HCC1_COL14_ROW2	11	Hepatocytes
HCC1_COL14_ROW3	5	CD8+ T cells
HCC1_COL14_ROW4	0	Hepatocytes
HCC1_COL14_ROW5	9	Hepatocytes
HCC1_COL14_ROW6	6	Macrophages
HCC1_COL14_ROW7	11	Hepatocytes
HCC1_COL14_ROW8	0	Hepatocytes
HCC1_COL14_ROW9	5	CD8+ T cells
HCC1_COL14_ROW10	0	Hepatocytes
HCC1_COL14_ROW11	0	Hepatocytes
HCC1_COL14_ROW12	0	Hepatocytes
HCC1_COL14_ROW13	9	Hepatocytes
HCC1_COL14_ROW14	6	Macrophages
HCC1_COL14_ROW15	0	Hepatocytes
HCC1_COL14_ROW16	0	Hepatocytes
HCC1_COL14_ROW17	0	Hepatocytes
HCC1_COL14_ROW18	0	Hepatocytes
HCC1_COL14_ROW19	0	Hepatocytes
HCC1_COL14_ROW20	0	Hepatocytes
HCC1_COL14_ROW21	0	Hepatocytes
HCC1_COL14_ROW22	0	Hepatocytes
HCC1_COL14_ROW23	0	Hepatocytes
HCC1_COL14_ROW24	0	Hepatocytes
HCC1_COL14_ROW25	0	Hepatocytes
HCC1_COL14_ROW26	0	Hepatocytes
HCC1_COL14_ROW27	0	Hepatocytes
HCC1_COL14_ROW28	0	Hepatocytes
HCC1_COL14_ROW29	0	Hepatocytes
HCC1_COL14_ROW30	0	Hepatocytes
HCC1_COL14_ROW31	0	Hepatocytes
HCC1_COL14_ROW32	0	Hepatocytes
HCC1_COL14_ROW33	11	Hepatocytes
HCC1_COL14_ROW34	11	Hepatocytes
HCC1_COL14_ROW35	0	Hepatocytes
HCC1_COL14_ROW36	0	Hepatocytes
HCC1_COL14_ROW37	11	Hepatocytes
HCC1_COL14_ROW38	0	Hepatocytes
HCC1_COL14_ROW39	0	Hepatocytes
HCC1_COL14_ROW40	11	Hepatocytes
HCC1_COL15_ROW1	0	Hepatocytes
HCC1_COL15_ROW2	0	Hepatocytes
HCC1_COL15_ROW3	0	Hepatocytes
HCC1_COL15_ROW4	0	Hepatocytes
HCC1_COL15_ROW5	0	Hepatocytes
HCC1_COL15_ROW6	0	Hepatocytes
HCC1_COL15_ROW7	0	Hepatocytes
HCC1_COL15_ROW8	0	Hepatocytes
HCC1_COL15_ROW9	0	Hepatocytes
HCC1_COL15_ROW10	0	Hepatocytes
HCC1_COL15_ROW11	0	Hepatocytes
HCC1_COL15_ROW12	0	Hepatocytes
HCC1_COL15_ROW13	0	Hepatocytes
HCC1_COL15_ROW14	0	Hepatocytes
HCC1_COL15_ROW15	0	Hepatocytes
HCC1_COL15_ROW16	0	Hepatocytes
HCC1_COL15_ROW17	0	Hepatocytes
HCC1_COL15_ROW18	0	Hepatocytes
HCC1_COL15_ROW19	0	Hepatocytes
HCC1_COL15_ROW20	0	Hepatocytes
HCC1_COL15_ROW21	0	Hepatocytes
HCC1_COL15_ROW22	0	Hepatocytes
HCC1_COL15_ROW23	0	Hepatocytes
HCC1_COL15_ROW24	0	Hepatocytes
HCC1_COL15_ROW25	0	Hepatocytes
HCC1_COL15_ROW26	0	Hepatocytes
HCC1_COL15_ROW27	0	Hepatocytes
HCC1_COL15_ROW28	0	Hepatocytes
HCC1_COL15_ROW29	0	Hepatocytes
HCC1_COL15_ROW30	0	Hepatocytes
HCC1_COL15_ROW31	0	Hepatocytes
HCC1_COL15_ROW32	0	Hepatocytes
HCC1_COL15_ROW33	11	Hepatocytes
HCC1_COL15_ROW34	0	Hepatocytes
HCC1_COL15_ROW35	0	Hepatocytes
HCC1_COL15_ROW36	0	Hepatocytes
HCC1_COL15_ROW37	0	Hepatocytes
HCC1_COL15_ROW38	0	Hepatocytes
HCC1_COL15_ROW39	0	Hepatocytes
HCC1_COL15_ROW40	0	Hepatocytes
HCC1_COL16_ROW1	0	Hepatocytes
HCC1_COL16_ROW2	0	Hepatocytes
HCC1_COL16_ROW3	0	Hepatocytes
HCC1_COL16_ROW4	6	Macrophages
HCC1_COL16_ROW5	0	Hepatocytes
HCC1_COL16_ROW6	0	Hepatocytes
HCC1_COL16_ROW7	0	Hepatocytes
HCC1_COL16_ROW8	0	Hepatocytes
HCC1_COL16_ROW9	0	Hepatocytes
HCC1_COL16_ROW10	0	Hepatocytes
HCC1_COL16_ROW11	0	Hepatocytes
HCC1_COL16_ROW12	0	Hepatocytes
HCC1_COL16_ROW13	0	Hepatocytes
HCC1_COL16_ROW14	0	Hepatocytes
HCC1_COL16_ROW15	0	Hepatocytes
HCC1_COL16_ROW16	0	Hepatocytes
HCC1_COL16_ROW17	0	Hepatocytes
HCC1_COL16_ROW18	0	Hepatocytes
HCC1_COL16_ROW19	0	Hepatocytes
HCC1_COL16_ROW20	0	Hepatocytes
HCC1_COL16_ROW21	0	Hepatocytes
HCC1_COL16_ROW22	0	Hepatocytes
HCC1_COL16_ROW23	0	Hepatocytes
HCC1_COL16_ROW24	0	Hepatocytes
HCC1_COL16_ROW25	0	Hepatocytes
HCC1_COL16_ROW26	0	Hepatocytes
HCC1_COL16_ROW27	0	Hepatocytes
HCC1_COL16_ROW28	0	Hepatocytes
HCC1_COL16_ROW29	0	Hepatocytes
HCC1_COL16_ROW30	0	Hepatocytes
HCC1_COL16_ROW31	0	Hepatocytes
HCC1_COL16_ROW32	0	Hepatocytes
HCC1_COL16_ROW33	11	Hepatocytes
HCC1_COL16_ROW34	0	Hepatocytes
HCC1_COL16_ROW35	0	Hepatocytes
HCC1_COL16_ROW36	0	Hepatocytes
HCC1_COL16_ROW37	0	Hepatocytes
HCC1_COL16_ROW38	0	Hepatocytes
HCC1_COL16_ROW39	0	Hepatocytes
HCC1_COL16_ROW40	0	Hepatocytes
HCC1_COL17_ROW1	0	Hepatocytes
HCC1_COL17_ROW2	11	Hepatocytes
HCC1_COL17_ROW3	0	Hepatocytes
HCC1_COL17_ROW4	0	Hepatocytes
HCC1_COL17_ROW5	0	Hepatocytes
HCC1_COL17_ROW6	0	Hepatocytes
HCC1_COL17_ROW7	11	Hepatocytes
HCC1_COL17_ROW8	0	Hepatocytes
HCC1_COL17_ROW9	0	Hepatocytes
HCC1_COL17_ROW10	0	Hepatocytes
HCC1_COL17_ROW11	0	Hepatocytes
HCC1_COL17_ROW12	0	Hepatocytes
HCC1_COL17_ROW13	0	Hepatocytes
HCC1_COL17_ROW14	0	Hepatocytes
HCC1_COL17_ROW15	0	Hepatocytes
HCC1_COL17_ROW16	0	Hepatocytes
HCC1_COL17_ROW17	0	Hepatocytes
HCC1_COL17_ROW18	0	Hepatocytes
HCC1_COL17_ROW19	11	Hepatocytes
HCC1_COL17_ROW20	0	Hepatocytes
HCC1_COL17_ROW21	0	Hepatocytes
HCC1_COL17_ROW22	0	Hepatocytes
HCC1_COL17_ROW23	0	Hepatocytes
HCC1_COL17_ROW24	0	Hepatocytes
HCC1_COL17_ROW25	6	Macrophages
HCC1_COL17_ROW26	0	Hepatocytes
HCC1_COL17_ROW27	0	Hepatocytes
HCC1_COL17_ROW28	0	Hepatocytes
HCC1_COL17_ROW29	0	Hepatocytes
HCC1_COL17_ROW30	0	Hepatocytes
HCC1_COL17_ROW31	0	Hepatocytes
HCC1_COL17_ROW32	0	Hepatocytes
HCC1_COL17_ROW33	0	Hepatocytes
HCC1_COL17_ROW34	0	Hepatocytes
HCC1_COL17_ROW35	0	Hepatocytes
HCC1_COL17_ROW36	0	Hepatocytes
HCC1_COL17_ROW37	0	Hepatocytes
HCC1_COL17_ROW38	0	Hepatocytes
HCC1_COL17_ROW39	0	Hepatocytes
HCC1_COL17_ROW40	0	Hepatocytes
HCC1_COL18_ROW1	0	Hepatocytes
HCC1_COL18_ROW2	0	Hepatocytes
HCC1_COL18_ROW3	0	Hepatocytes
HCC1_COL18_ROW4	0	Hepatocytes
HCC1_COL18_ROW5	0	Hepatocytes
HCC1_COL18_ROW6	0	Hepatocytes
HCC1_COL18_ROW7	0	Hepatocytes
HCC1_COL18_ROW8	0	Hepatocytes
HCC1_COL18_ROW9	0	Hepatocytes
HCC1_COL18_ROW10	0	Hepatocytes
HCC1_COL18_ROW11	5	CD8+ T cells
HCC1_COL18_ROW12	0	Hepatocytes
HCC1_COL18_ROW13	0	Hepatocytes
HCC1_COL18_ROW14	0	Hepatocytes
HCC1_COL18_ROW15	0	Hepatocytes
HCC1_COL18_ROW16	0	Hepatocytes
HCC1_COL18_ROW17	0	Hepatocytes
HCC1_COL18_ROW18	0	Hepatocytes
HCC1_COL18_ROW19	11	Hepatocytes
HCC1_COL18_ROW20	11	Hepatocytes
HCC1_COL18_ROW21	0	Hepatocytes
HCC1_COL18_ROW22	11	Hepatocytes
HCC1_COL18_ROW23	0	Hepatocytes
HCC1_COL18_ROW24	0	Hepatocytes
HCC1_COL18_ROW25	0	Hepatocytes
HCC1_COL18_ROW26	0	Hepatocytes
HCC1_COL18_ROW27	0	Hepatocytes
HCC1_COL18_ROW28	0	Hepatocytes
HCC1_COL18_ROW29	11	Hepatocytes
HCC1_COL18_ROW30	0	Hepatocytes
HCC1_COL18_ROW31	0	Hepatocytes
HCC1_COL18_ROW32	0	Hepatocytes
HCC1_COL18_ROW33	0	Hepatocytes
HCC1_COL18_ROW34	0	Hepatocytes
HCC1_COL18_ROW35	0	Hepatocytes
HCC1_COL18_ROW36	0	Hepatocytes
HCC1_COL18_ROW37	0	Hepatocytes
HCC1_COL18_ROW38	0	Hepatocytes
HCC1_COL18_ROW39	0	Hepatocytes
HCC1_COL18_ROW40	0	Hepatocytes
HCC1_COL19_ROW1	0	Hepatocytes
HCC1_COL19_ROW2	0	Hepatocytes
HCC1_COL19_ROW3	0	Hepatocytes
HCC1_COL19_ROW4	0	Hepatocytes
HCC1_COL19_ROW5	0	Hepatocytes
HCC1_COL19_ROW6	0	Hepatocytes
HCC1_COL19_ROW7	0	Hepatocytes
HCC1_COL19_ROW8	9	Hepatocytes
HCC1_COL19_ROW9	11	Hepatocytes
HCC1_COL19_ROW10	0	Hepatocytes
HCC1_COL19_ROW11	0	Hepatocytes
HCC1_COL19_ROW12	0	Hepatocytes
HCC1_COL19_ROW13	0	Hepatocytes
HCC1_COL19_ROW14	11	Hepatocytes
HCC1_COL19_ROW15	0	Hepatocytes
HCC1_COL19_ROW16	0	Hepatocytes
HCC1_COL19_ROW17	0	Hepatocytes
HCC1_COL19_ROW18	11	Hepatocytes
HCC1_COL19_ROW19	0	Hepatocytes
HCC1_COL19_ROW20	0	Hepatocytes
HCC1_COL19_ROW21	0	Hepatocytes
HCC1_COL19_ROW22	0	Hepatocytes
HCC1_COL19_ROW23	0	Hepatocytes
HCC1_COL19_ROW24	0	Hepatocytes
HCC1_COL19_ROW25	0	Hepatocytes
HCC1_COL19_ROW26	0	Hepatocytes
HCC1_COL19_ROW27	0	Hepatocytes
HCC1_COL19_ROW28	0	Hepatocytes
HCC1_COL19_ROW29	0	Hepatocytes
HCC1_COL19_ROW30	0	Hepatocytes
HCC1_COL19_ROW31	0	Hepatocytes
HCC1_COL19_ROW32	0	Hepatocytes
HCC1_COL19_ROW33	11	Hepatocytes
HCC1_COL19_ROW34	0	Hepatocytes
HCC1_COL19_ROW35	11	Hepatocytes
HCC1_COL19_ROW36	11	Hepatocytes
HCC1_COL19_ROW37	0	Hepatocytes
HCC1_COL19_ROW38	0	Hepatocytes
HCC1_COL19_ROW39	0	Hepatocytes
HCC1_COL19_ROW40	0	Hepatocytes
HCC1_COL20_ROW1	0	Hepatocytes
HCC1_COL20_ROW2	0	Hepatocytes
HCC1_COL20_ROW3	0	Hepatocytes
HCC1_COL20_ROW4	0	Hepatocytes
HCC1_COL20_ROW5	0	Hepatocytes
HCC1_COL20_ROW6	0	Hepatocytes
HCC1_COL20_ROW7	0	Hepatocytes
HCC1_COL20_ROW8	0	Hepatocytes
HCC1_COL20_ROW9	11	Hepatocytes
HCC1_COL20_ROW10	0	Hepatocytes
HCC1_COL20_ROW11	0	Hepatocytes
HCC1_COL20_ROW12	0	Hepatocytes
HCC1_COL20_ROW13	0	Hepatocytes
HCC1_COL20_ROW14	0	Hepatocytes
HCC1_COL20_ROW15	0	Hepatocytes
HCC1_COL20_ROW16	11	Hepatocytes
HCC1_COL20_ROW17	0	Hepatocytes
HCC1_COL20_ROW18	0	Hepatocytes
HCC1_COL20_ROW19	0	Hepatocytes
HCC1_COL20_ROW20	0	Hepatocytes
HCC1_COL20_ROW21	0	Hepatocytes
HCC1_COL20_ROW22	0	Hepatocytes
HCC1_COL20_ROW23	11	Hepatocytes
HCC1_COL20_ROW24	0	Hepatocytes
HCC1_COL20_ROW25	0	Hepatocytes
HCC1_COL20_ROW26	6	Macrophages
HCC1_COL20_ROW27	9	Hepatocytes
HCC1_COL20_ROW28	11	Hepatocytes
HCC1_COL20_ROW29	0	Hepatocytes
HCC1_COL20_ROW30	0	Hepatocytes
HCC1_COL20_ROW31	0	Hepatocytes
HCC1_COL20_ROW32	0	Hepatocytes
HCC1_COL20_ROW33	0	Hepatocytes
HCC1_COL20_ROW34	0	Hepatocytes
HCC1_COL20_ROW35	0	Hepatocytes
HCC1_COL20_ROW36	11	Hepatocytes
HCC1_COL20_ROW37	0	Hepatocytes
HCC1_COL20_ROW38	0	Hepatocytes
HCC1_COL20_ROW39	0	Hepatocytes
HCC1_COL20_ROW40	0	Hepatocytes
HCC2_COL1_ROW1	2	Hepatocytes
HCC2_COL1_ROW2	2	Hepatocytes
HCC2_COL1_ROW3	5	CD8+ T cells
HCC2_COL1_ROW4	2	Hepatocytes
HCC2_COL1_ROW5	2	Hepatocytes
HCC2_COL1_ROW6	4	Hepatocytes
HCC2_COL1_ROW7	4	Hepatocytes
HCC2_COL1_ROW8	4	Hepatocytes
HCC2_COL1_ROW9	2	Hepatocytes
HCC2_COL1_ROW10	6	Macrophages
HCC2_COL1_ROW11	2	Hepatocytes
HCC2_COL1_ROW12	2	Hepatocytes
HCC2_COL1_ROW13	2	Hepatocytes
HCC2_COL1_ROW14	4	Hepatocytes
HCC2_COL1_ROW15	2	Hepatocytes
HCC2_COL1_ROW16	4	Hepatocytes
HCC2_COL1_ROW17	2	Hepatocytes
HCC2_COL1_ROW18	6	Macrophages
HCC2_COL1_ROW19	2	Hepatocytes
HCC2_COL1_ROW20	6	Macrophages
HCC2_COL1_ROW21	2	Hepatocytes
HCC2_COL1_ROW22	2	Hepatocytes
HCC2_COL1_ROW23	2	Hepatocytes
HCC2_COL1_ROW24	4	Hepatocytes
HCC2_COL1_ROW25	2	Hepatocytes
HCC2_COL1_ROW26	5	CD8+ T cells
HCC2_COL1_ROW27	5	CD8+ T cells
HCC2_COL1_ROW28	2	Hepatocytes
HCC2_COL1_ROW29	4	Hepatocytes
HCC2_COL1_ROW30	4	Hepatocytes
HCC2_COL1_ROW31	2	Hepatocytes
HCC2_COL1_ROW32	4	Hepatocytes
HCC2_COL1_ROW33	4	Hepatocytes
HCC2_COL1_ROW34	4	Hepatocytes
HCC2_COL1_ROW35	2	Hepatocytes
HCC2_COL1_ROW36	4	Hepatocytes
HCC2_COL1_ROW37	2	Hepatocytes
HCC2_COL1_ROW38	5	CD8+ T cells
HCC2_COL1_ROW39	1	Hepatocytes
HCC2_COL1_ROW40	4	Hepatocytes
HCC2_COL2_ROW1	2	Hepatocytes
HCC2_COL2_ROW2	5	CD8+ T cells
HCC2_COL2_ROW3	2	Hepatocytes
HCC2_COL2_ROW4	2	Hepatocytes
HCC2_COL2_ROW5	4	Hepatocytes
HCC2_COL2_ROW6	2	Hepatocytes
HCC2_COL2_ROW7	6	Macrophages
HCC2_COL2_ROW8	5	CD8+ T cells
HCC2_COL2_ROW9	2	Hepatocytes
HCC2_COL2_ROW10	4	Hepatocytes
HCC2_COL2_ROW11	4	Hepatocytes
HCC2_COL2_ROW12	2	Hepatocytes
HCC2_COL2_ROW13	2	Hepatocytes
HCC2_COL2_ROW14	4	Hepatocytes
HCC2_COL2_ROW15	4	Hepatocytes
HCC2_COL2_ROW16	6	Macrophages
HCC2_COL2_ROW17	6	Macrophages
HCC2_COL2_ROW18	4	Hepatocytes
HCC2_COL2_ROW19	2	Hepatocytes
HCC2_COL2_ROW20	4	Hepatocytes
HCC2_COL2_ROW21	2	Hepatocytes
HCC2_COL2_ROW22	6	Macrophages
HCC2_COL2_ROW23	4	Hepatocytes
HCC2_COL2_ROW24	2	Hepatocytes
HCC2_COL2_ROW25	2	Hepatocytes
HCC2_COL2_ROW26	6	Macrophages
HCC2_COL2_ROW27	4	Hepatocytes
HCC2_COL2_ROW28	4	Hepatocytes
HCC2_COL2_ROW29	4	Hepatocytes
HCC2_COL2_ROW30	4	Hepatocytes
HCC2_COL2_ROW31	6	Macrophages
HCC2_COL2_ROW32	2	Hepatocytes
HCC2_COL2_ROW33	4	Hepatocytes
HCC2_COL2_ROW34	6	Macrophages
HCC2_COL2_ROW35	4	Hepatocytes
HCC2_COL2_ROW36	4	Hepatocytes
HCC2_COL2_ROW37	2	Hepatocytes
HCC2_COL2_ROW38	2	Hepatocytes
HCC2_COL2_ROW40	4	Hepatocytes
HCC2_COL3_ROW1	4	Hepatocytes
HCC2_COL3_ROW2	5	CD8+ T cells
HCC2_COL3_ROW3	2	Hepatocytes
HCC2_COL3_ROW4	4	Hepatocytes
HCC2_COL3_ROW5	7	B-cells
HCC2_COL3_ROW6	2	Hepatocytes
HCC2_COL3_ROW7	4	Hepatocytes
HCC2_COL3_ROW8	6	Macrophages
HCC2_COL3_ROW9	4	Hepatocytes
HCC2_COL3_ROW10	2	Hepatocytes
HCC2_COL3_ROW11	6	Macrophages
HCC2_COL3_ROW12	6	Macrophages
HCC2_COL3_ROW13	4	Hepatocytes
HCC2_COL3_ROW14	6	Macrophages
HCC2_COL3_ROW15	9	Hepatocytes
HCC2_COL3_ROW16	4	Hepatocytes
HCC2_COL3_ROW17	4	Hepatocytes
HCC2_COL3_ROW18	2	Hepatocytes
HCC2_COL3_ROW19	6	Macrophages
HCC2_COL3_ROW20	4	Hepatocytes
HCC2_COL3_ROW21	5	CD8+ T cells
HCC2_COL3_ROW22	2	Hepatocytes
HCC2_COL3_ROW23	2	Hepatocytes
HCC2_COL3_ROW24	6	Macrophages
HCC2_COL3_ROW25	2	Hepatocytes
HCC2_COL3_ROW26	2	Hepatocytes
HCC2_COL3_ROW27	2	Hepatocytes
HCC2_COL3_ROW28	2	Hepatocytes
HCC2_COL3_ROW29	6	Macrophages
HCC2_COL3_ROW30	4	Hepatocytes
HCC2_COL3_ROW31	2	Hepatocytes
HCC2_COL3_ROW32	2	Hepatocytes
HCC2_COL3_ROW33	13	NK cells
HCC2_COL3_ROW34	4	Hepatocytes
HCC2_COL3_ROW35	5	CD8+ T cells
HCC2_COL3_ROW36	6	Macrophages
HCC2_COL3_ROW37	4	Hepatocytes
HCC2_COL3_ROW38	5	CD8+ T cells
HCC2_COL3_ROW39	2	Hepatocytes
HCC2_COL3_ROW40	4	Hepatocytes
HCC2_COL4_ROW1	4	Hepatocytes
HCC2_COL4_ROW2	4	Hepatocytes
HCC2_COL4_ROW3	2	Hepatocytes
HCC2_COL4_ROW4	2	Hepatocytes
HCC2_COL4_ROW5	2	Hepatocytes
HCC2_COL4_ROW6	2	Hepatocytes
HCC2_COL4_ROW7	5	CD8+ T cells
HCC2_COL4_ROW8	4	Hepatocytes
HCC2_COL4_ROW9	2	Hepatocytes
HCC2_COL4_ROW10	4	Hepatocytes
HCC2_COL4_ROW11	6	Macrophages
HCC2_COL4_ROW12	2	Hepatocytes
HCC2_COL4_ROW13	5	CD8+ T cells
HCC2_COL4_ROW14	2	Hepatocytes
HCC2_COL4_ROW15	4	Hepatocytes
HCC2_COL4_ROW16	4	Hepatocytes
HCC2_COL4_ROW17	4	Hepatocytes
HCC2_COL4_ROW18	2	Hepatocytes
HCC2_COL4_ROW19	4	Hepatocytes
HCC2_COL4_ROW20	2	Hepatocytes
HCC2_COL4_ROW21	6	Macrophages
HCC2_COL4_ROW22	2	Hepatocytes
HCC2_COL4_ROW23	6	Macrophages
HCC2_COL4_ROW24	6	Macrophages
HCC2_COL4_ROW25	6	Macrophages
HCC2_COL4_ROW26	2	Hepatocytes
HCC2_COL4_ROW27	4	Hepatocytes
HCC2_COL4_ROW28	2	Hepatocytes
HCC2_COL4_ROW29	6	Macrophages
HCC2_COL4_ROW30	4	Hepatocytes
HCC2_COL4_ROW31	2	Hepatocytes
HCC2_COL4_ROW32	4	Hepatocytes
HCC2_COL4_ROW33	9	Hepatocytes
HCC2_COL4_ROW34	2	Hepatocytes
HCC2_COL4_ROW35	6	Macrophages
HCC2_COL4_ROW36	6	Macrophages
HCC2_COL4_ROW37	4	Hepatocytes
HCC2_COL4_ROW38	2	Hepatocytes
HCC2_COL4_ROW40	4	Hepatocytes
HCC2_COL5_ROW1	4	Hepatocytes
HCC2_COL5_ROW2	2	Hepatocytes
HCC2_COL5_ROW3	2	Hepatocytes
HCC2_COL5_ROW4	6	Macrophages
HCC2_COL5_ROW5	5	CD8+ T cells
HCC2_COL5_ROW6	4	Hepatocytes
HCC2_COL5_ROW7	2	Hepatocytes
HCC2_COL5_ROW8	5	CD8+ T cells
HCC2_COL5_ROW9	2	Hepatocytes
HCC2_COL5_ROW10	4	Hepatocytes
HCC2_COL5_ROW11	4	Hepatocytes
HCC2_COL5_ROW12	13	NK cells
HCC2_COL5_ROW13	4	Hepatocytes
HCC2_COL5_ROW14	4	Hepatocytes
HCC2_COL5_ROW15	2	Hepatocytes
HCC2_COL5_ROW16	9	Hepatocytes
HCC2_COL5_ROW17	13	NK cells
HCC2_COL5_ROW18	10	CD8+ T cells
HCC2_COL5_ROW19	4	Hepatocytes
HCC2_COL5_ROW20	2	Hepatocytes
HCC2_COL5_ROW21	2	Hepatocytes
HCC2_COL5_ROW22	2	Hepatocytes
HCC2_COL5_ROW23	4	Hepatocytes
HCC2_COL5_ROW24	2	Hepatocytes
HCC2_COL5_ROW25	4	Hepatocytes
HCC2_COL5_ROW26	6	Macrophages
HCC2_COL5_ROW27	2	Hepatocytes
HCC2_COL5_ROW28	2	Hepatocytes
HCC2_COL5_ROW29	6	Macrophages
HCC2_COL5_ROW30	2	Hepatocytes
HCC2_COL5_ROW31	2	Hepatocytes
HCC2_COL5_ROW32	2	Hepatocytes
HCC2_COL5_ROW33	6	Macrophages
HCC2_COL5_ROW34	4	Hepatocytes
HCC2_COL5_ROW35	2	Hepatocytes
HCC2_COL5_ROW36	2	Hepatocytes
HCC2_COL5_ROW37	2	Hepatocytes
HCC2_COL5_ROW38	4	Hepatocytes
HCC2_COL5_ROW40	2	Hepatocytes
HCC2_COL6_ROW1	6	Macrophages
HCC2_COL6_ROW2	5	CD8+ T cells
HCC2_COL6_ROW3	13	NK cells
HCC2_COL6_ROW4	2	Hepatocytes
HCC2_COL6_ROW5	4	Hepatocytes
HCC2_COL6_ROW6	4	Hepatocytes
HCC2_COL6_ROW7	5	CD8+ T cells
HCC2_COL6_ROW8	6	Macrophages
HCC2_COL6_ROW9	2	Hepatocytes
HCC2_COL6_ROW10	2	Hepatocytes
HCC2_COL6_ROW11	4	Hepatocytes
HCC2_COL6_ROW12	10	CD8+ T cells
HCC2_COL6_ROW13	6	Macrophages
HCC2_COL6_ROW14	4	Hepatocytes
HCC2_COL6_ROW15	2	Hepatocytes
HCC2_COL6_ROW16	2	Hepatocytes
HCC2_COL6_ROW17	13	NK cells
HCC2_COL6_ROW18	4	Hepatocytes
HCC2_COL6_ROW19	4	Hepatocytes
HCC2_COL6_ROW20	2	Hepatocytes
HCC2_COL6_ROW21	4	Hepatocytes
HCC2_COL6_ROW22	2	Hepatocytes
HCC2_COL6_ROW23	4	Hepatocytes
HCC2_COL6_ROW24	2	Hepatocytes
HCC2_COL6_ROW25	5	CD8+ T cells
HCC2_COL6_ROW26	2	Hepatocytes
HCC2_COL6_ROW27	4	Hepatocytes
HCC2_COL6_ROW28	4	Hepatocytes
HCC2_COL6_ROW29	2	Hepatocytes
HCC2_COL6_ROW30	4	Hepatocytes
HCC2_COL6_ROW31	4	Hepatocytes
HCC2_COL6_ROW32	4	Hepatocytes
HCC2_COL6_ROW33	4	Hepatocytes
HCC2_COL6_ROW34	6	Macrophages
HCC2_COL6_ROW35	9	Hepatocytes
HCC2_COL6_ROW36	4	Hepatocytes
HCC2_COL6_ROW37	6	Macrophages
HCC2_COL6_ROW38	2	Hepatocytes
HCC2_COL6_ROW40	2	Hepatocytes
HCC2_COL7_ROW1	4	Hepatocytes
HCC2_COL7_ROW2	2	Hepatocytes
HCC2_COL7_ROW3	2	Hepatocytes
HCC2_COL7_ROW4	9	Hepatocytes
HCC2_COL7_ROW5	4	Hepatocytes
HCC2_COL7_ROW6	4	Hepatocytes
HCC2_COL7_ROW7	2	Hepatocytes
HCC2_COL7_ROW8	6	Macrophages
HCC2_COL7_ROW9	4	Hepatocytes
HCC2_COL7_ROW10	4	Hepatocytes
HCC2_COL7_ROW11	6	Macrophages
HCC2_COL7_ROW12	9	Hepatocytes
HCC2_COL7_ROW13	9	Hepatocytes
HCC2_COL7_ROW14	6	Macrophages
HCC2_COL7_ROW15	4	Hepatocytes
HCC2_COL7_ROW16	6	Macrophages
HCC2_COL7_ROW17	4	Hepatocytes
HCC2_COL7_ROW18	6	Macrophages
HCC2_COL7_ROW19	4	Hepatocytes
HCC2_COL7_ROW20	4	Hepatocytes
HCC2_COL7_ROW21	2	Hepatocytes
HCC2_COL7_ROW22	2	Hepatocytes
HCC2_COL7_ROW23	4	Hepatocytes
HCC2_COL7_ROW24	4	Hepatocytes
HCC2_COL7_ROW25	2	Hepatocytes
HCC2_COL7_ROW26	6	Macrophages
HCC2_COL7_ROW27	6	Macrophages
HCC2_COL7_ROW28	2	Hepatocytes
HCC2_COL7_ROW29	2	Hepatocytes
HCC2_COL7_ROW30	6	Macrophages
HCC2_COL7_ROW31	6	Macrophages
HCC2_COL7_ROW32	6	Macrophages
HCC2_COL7_ROW33	4	Hepatocytes
HCC2_COL7_ROW34	2	Hepatocytes
HCC2_COL7_ROW35	2	Hepatocytes
HCC2_COL7_ROW36	2	Hepatocytes
HCC2_COL7_ROW37	2	Hepatocytes
HCC2_COL7_ROW38	2	Hepatocytes
HCC2_COL7_ROW40	13	NK cells
HCC2_COL8_ROW1	2	Hepatocytes
HCC2_COL8_ROW2	2	Hepatocytes
HCC2_COL8_ROW3	4	Hepatocytes
HCC2_COL8_ROW4	4	Hepatocytes
HCC2_COL8_ROW5	6	Macrophages
HCC2_COL8_ROW6	4	Hepatocytes
HCC2_COL8_ROW7	4	Hepatocytes
HCC2_COL8_ROW8	6	Macrophages
HCC2_COL8_ROW9	6	Macrophages
HCC2_COL8_ROW10	4	Hepatocytes
HCC2_COL8_ROW11	5	CD8+ T cells
HCC2_COL8_ROW12	6	Macrophages
HCC2_COL8_ROW13	4	Hepatocytes
HCC2_COL8_ROW14	2	Hepatocytes
HCC2_COL8_ROW15	2	Hepatocytes
HCC2_COL8_ROW16	6	Macrophages
HCC2_COL8_ROW17	2	Hepatocytes
HCC2_COL8_ROW18	4	Hepatocytes
HCC2_COL8_ROW19	2	Hepatocytes
HCC2_COL8_ROW20	2	Hepatocytes
HCC2_COL8_ROW21	6	Macrophages
HCC2_COL8_ROW22	4	Hepatocytes
HCC2_COL8_ROW23	2	Hepatocytes
HCC2_COL8_ROW24	4	Hepatocytes
HCC2_COL8_ROW25	2	Hepatocytes
HCC2_COL8_ROW26	4	Hepatocytes
HCC2_COL8_ROW27	4	Hepatocytes
HCC2_COL8_ROW28	6	Macrophages
HCC2_COL8_ROW29	6	Macrophages
HCC2_COL8_ROW30	2	Hepatocytes
HCC2_COL8_ROW31	6	Macrophages
HCC2_COL8_ROW32	4	Hepatocytes
HCC2_COL8_ROW33	2	Hepatocytes
HCC2_COL8_ROW34	2	Hepatocytes
HCC2_COL8_ROW35	4	Hepatocytes
HCC2_COL8_ROW36	4	Hepatocytes
HCC2_COL8_ROW37	2	Hepatocytes
HCC2_COL8_ROW38	6	Macrophages
HCC2_COL8_ROW40	2	Hepatocytes
HCC2_COL9_ROW1	2	Hepatocytes
HCC2_COL9_ROW2	9	Hepatocytes
HCC2_COL9_ROW3	4	Hepatocytes
HCC2_COL9_ROW4	2	Hepatocytes
HCC2_COL9_ROW5	2	Hepatocytes
HCC2_COL9_ROW6	4	Hepatocytes
HCC2_COL9_ROW7	2	Hepatocytes
HCC2_COL9_ROW8	2	Hepatocytes
HCC2_COL9_ROW9	2	Hepatocytes
HCC2_COL9_ROW10	4	Hepatocytes
HCC2_COL9_ROW11	4	Hepatocytes
HCC2_COL9_ROW12	1	Hepatocytes
HCC2_COL9_ROW13	2	Hepatocytes
HCC2_COL9_ROW14	2	Hepatocytes
HCC2_COL9_ROW15	4	Hepatocytes
HCC2_COL9_ROW16	4	Hepatocytes
HCC2_COL9_ROW17	6	Macrophages
HCC2_COL9_ROW18	9	Hepatocytes
HCC2_COL9_ROW19	6	Macrophages
HCC2_COL9_ROW20	6	Macrophages
HCC2_COL9_ROW21	0	Hepatocytes
HCC2_COL9_ROW22	5	CD8+ T cells
HCC2_COL9_ROW23	6	Macrophages
HCC2_COL9_ROW24	2	Hepatocytes
HCC2_COL9_ROW25	2	Hepatocytes
HCC2_COL9_ROW26	2	Hepatocytes
HCC2_COL9_ROW27	3	Hepatocytes
HCC2_COL9_ROW28	2	Hepatocytes
HCC2_COL9_ROW29	4	Hepatocytes
HCC2_COL9_ROW30	2	Hepatocytes
HCC2_COL9_ROW31	2	Hepatocytes
HCC2_COL9_ROW32	6	Macrophages
HCC2_COL9_ROW33	9	Hepatocytes
HCC2_COL9_ROW34	2	Hepatocytes
HCC2_COL9_ROW35	4	Hepatocytes
HCC2_COL9_ROW36	4	Hepatocytes
HCC2_COL9_ROW37	6	Macrophages
HCC2_COL9_ROW38	4	Hepatocytes
HCC2_COL9_ROW40	4	Hepatocytes
HCC2_COL10_ROW1	4	Hepatocytes
HCC2_COL10_ROW2	4	Hepatocytes
HCC2_COL10_ROW3	2	Hepatocytes
HCC2_COL10_ROW4	5	CD8+ T cells
HCC2_COL10_ROW5	4	Hepatocytes
HCC2_COL10_ROW6	2	Hepatocytes
HCC2_COL10_ROW7	2	Hepatocytes
HCC2_COL10_ROW8	2	Hepatocytes
HCC2_COL10_ROW9	4	Hepatocytes
HCC2_COL10_ROW10	4	Hepatocytes
HCC2_COL10_ROW11	6	Macrophages
HCC2_COL10_ROW12	4	Hepatocytes
HCC2_COL10_ROW13	4	Hepatocytes
HCC2_COL10_ROW14	2	Hepatocytes
HCC2_COL10_ROW15	5	CD8+ T cells
HCC2_COL10_ROW16	4	Hepatocytes
HCC2_COL10_ROW17	4	Hepatocytes
HCC2_COL10_ROW18	13	NK cells
HCC2_COL10_ROW19	9	Hepatocytes
HCC2_COL10_ROW20	4	Hepatocytes
HCC2_COL10_ROW21	13	NK cells
HCC2_COL10_ROW22	13	NK cells
HCC2_COL10_ROW23	2	Hepatocytes
HCC2_COL10_ROW24	2	Hepatocytes
HCC2_COL10_ROW25	5	CD8+ T cells
HCC2_COL10_ROW26	6	Macrophages
HCC2_COL10_ROW27	2	Hepatocytes
HCC2_COL10_ROW28	2	Hepatocytes
HCC2_COL10_ROW29	6	Macrophages
HCC2_COL10_ROW30	5	CD8+ T cells
HCC2_COL10_ROW31	2	Hepatocytes
HCC2_COL10_ROW32	4	Hepatocytes
HCC2_COL10_ROW33	2	Hepatocytes
HCC2_COL10_ROW34	2	Hepatocytes
HCC2_COL10_ROW35	4	Hepatocytes
HCC2_COL10_ROW36	9	Hepatocytes
HCC2_COL10_ROW37	2	Hepatocytes
HCC2_COL10_ROW38	2	Hepatocytes
HCC2_COL10_ROW40	4	Hepatocytes
HCC2_COL11_ROW1	2	Hepatocytes
HCC2_COL11_ROW2	2	Hepatocytes
HCC2_COL11_ROW3	2	Hepatocytes
HCC2_COL11_ROW4	9	Hepatocytes
HCC2_COL11_ROW5	4	Hepatocytes
HCC2_COL11_ROW6	2	Hepatocytes
HCC2_COL11_ROW7	2	Hepatocytes
HCC2_COL11_ROW8	4	Hepatocytes
HCC2_COL11_ROW9	5	CD8+ T cells
HCC2_COL11_ROW10	5	CD8+ T cells
HCC2_COL11_ROW11	10	CD8+ T cells
HCC2_COL11_ROW12	5	CD8+ T cells
HCC2_COL11_ROW13	2	Hepatocytes
HCC2_COL11_ROW14	6	Macrophages
HCC2_COL11_ROW15	13	NK cells
HCC2_COL11_ROW16	6	Macrophages
HCC2_COL11_ROW17	2	Hepatocytes
HCC2_COL11_ROW18	4	Hepatocytes
HCC2_COL11_ROW19	6	Macrophages
HCC2_COL11_ROW20	4	Hepatocytes
HCC2_COL11_ROW21	4	Hepatocytes
HCC2_COL11_ROW22	6	Macrophages
HCC2_COL11_ROW23	2	Hepatocytes
HCC2_COL11_ROW24	6	Macrophages
HCC2_COL11_ROW25	4	Hepatocytes
HCC2_COL11_ROW26	5	CD8+ T cells
HCC2_COL11_ROW27	2	Hepatocytes
HCC2_COL11_ROW28	4	Hepatocytes
HCC2_COL11_ROW29	2	Hepatocytes
HCC2_COL11_ROW30	4	Hepatocytes
HCC2_COL11_ROW31	4	Hepatocytes
HCC2_COL11_ROW32	2	Hepatocytes
HCC2_COL11_ROW33	5	CD8+ T cells
HCC2_COL11_ROW34	2	Hepatocytes
HCC2_COL11_ROW35	13	NK cells
HCC2_COL11_ROW36	4	Hepatocytes
HCC2_COL11_ROW37	6	Macrophages
HCC2_COL11_ROW38	4	Hepatocytes
HCC2_COL11_ROW40	6	Macrophages
HCC2_COL12_ROW1	4	Hepatocytes
HCC2_COL12_ROW2	2	Hepatocytes
HCC2_COL12_ROW3	5	CD8+ T cells
HCC2_COL12_ROW4	5	CD8+ T cells
HCC2_COL12_ROW5	2	Hepatocytes
HCC2_COL12_ROW6	2	Hepatocytes
HCC2_COL12_ROW7	4	Hepatocytes
HCC2_COL12_ROW8	2	Hepatocytes
HCC2_COL12_ROW9	2	Hepatocytes
HCC2_COL12_ROW10	4	Hepatocytes
HCC2_COL12_ROW11	4	Hepatocytes
HCC2_COL12_ROW12	6	Macrophages
HCC2_COL12_ROW13	2	Hepatocytes
HCC2_COL12_ROW14	9	Hepatocytes
HCC2_COL12_ROW15	2	Hepatocytes
HCC2_COL12_ROW16	6	Macrophages
HCC2_COL12_ROW17	13	NK cells
HCC2_COL12_ROW18	4	Hepatocytes
HCC2_COL12_ROW19	6	Macrophages
HCC2_COL12_ROW20	2	Hepatocytes
HCC2_COL12_ROW21	2	Hepatocytes
HCC2_COL12_ROW22	4	Hepatocytes
HCC2_COL12_ROW23	6	Macrophages
HCC2_COL12_ROW24	4	Hepatocytes
HCC2_COL12_ROW25	4	Hepatocytes
HCC2_COL12_ROW26	2	Hepatocytes
HCC2_COL12_ROW27	2	Hepatocytes
HCC2_COL12_ROW28	4	Hepatocytes
HCC2_COL12_ROW29	2	Hepatocytes
HCC2_COL12_ROW30	6	Macrophages
HCC2_COL12_ROW31	5	CD8+ T cells
HCC2_COL12_ROW32	9	Hepatocytes
HCC2_COL12_ROW33	2	Hepatocytes
HCC2_COL12_ROW34	6	Macrophages
HCC2_COL12_ROW35	2	Hepatocytes
HCC2_COL12_ROW36	4	Hepatocytes
HCC2_COL12_ROW37	6	Macrophages
HCC2_COL12_ROW38	4	Hepatocytes
HCC2_COL12_ROW40	2	Hepatocytes
HCC2_COL13_ROW1	2	Hepatocytes
HCC2_COL13_ROW2	2	Hepatocytes
HCC2_COL13_ROW3	4	Hepatocytes
HCC2_COL13_ROW4	6	Macrophages
HCC2_COL13_ROW5	2	Hepatocytes
HCC2_COL13_ROW6	2	Hepatocytes
HCC2_COL13_ROW7	6	Macrophages
HCC2_COL13_ROW8	2	Hepatocytes
HCC2_COL13_ROW9	4	Hepatocytes
HCC2_COL13_ROW10	2	Hepatocytes
HCC2_COL13_ROW11	4	Hepatocytes
HCC2_COL13_ROW12	4	Hepatocytes
HCC2_COL13_ROW13	4	Hepatocytes
HCC2_COL13_ROW14	2	Hepatocytes
HCC2_COL13_ROW15	4	Hepatocytes
HCC2_COL13_ROW16	2	Hepatocytes
HCC2_COL13_ROW17	6	Macrophages
HCC2_COL13_ROW18	2	Hepatocytes
HCC2_COL13_ROW19	2	Hepatocytes
HCC2_COL13_ROW20	2	Hepatocytes
HCC2_COL13_ROW21	6	Macrophages
HCC2_COL13_ROW22	2	Hepatocytes
HCC2_COL13_ROW23	4	Hepatocytes
HCC2_COL13_ROW24	4	Hepatocytes
HCC2_COL13_ROW25	6	Macrophages
HCC2_COL13_ROW26	13	NK cells
HCC2_COL13_ROW27	2	Hepatocytes
HCC2_COL13_ROW28	6	Macrophages
HCC2_COL13_ROW29	4	Hepatocytes
HCC2_COL13_ROW30	4	Hepatocytes
HCC2_COL13_ROW31	4	Hepatocytes
HCC2_COL13_ROW32	2	Hepatocytes
HCC2_COL13_ROW33	9	Hepatocytes
HCC2_COL13_ROW34	13	NK cells
HCC2_COL13_ROW35	2	Hepatocytes
HCC2_COL13_ROW36	6	Macrophages
HCC2_COL13_ROW37	4	Hepatocytes
HCC2_COL13_ROW38	4	Hepatocytes
HCC2_COL13_ROW39	2	Hepatocytes
HCC2_COL13_ROW40	2	Hepatocytes
HCC2_COL14_ROW1	9	Hepatocytes
HCC2_COL14_ROW2	4	Hepatocytes
HCC2_COL14_ROW3	2	Hepatocytes
HCC2_COL14_ROW4	2	Hepatocytes
HCC2_COL14_ROW5	4	Hepatocytes
HCC2_COL14_ROW6	4	Hepatocytes
HCC2_COL14_ROW7	2	Hepatocytes
HCC2_COL14_ROW8	4	Hepatocytes
HCC2_COL14_ROW9	6	Macrophages
HCC2_COL14_ROW10	6	Macrophages
HCC2_COL14_ROW11	5	CD8+ T cells
HCC2_COL14_ROW12	2	Hepatocytes
HCC2_COL14_ROW13	6	Macrophages
HCC2_COL14_ROW14	2	Hepatocytes
HCC2_COL14_ROW15	4	Hepatocytes
HCC2_COL14_ROW16	2	Hepatocytes
HCC2_COL14_ROW17	4	Hepatocytes
HCC2_COL14_ROW18	4	Hepatocytes
HCC2_COL14_ROW19	4	Hepatocytes
HCC2_COL14_ROW20	4	Hepatocytes
HCC2_COL14_ROW21	4	Hepatocytes
HCC2_COL14_ROW22	4	Hepatocytes
HCC2_COL14_ROW23	2	Hepatocytes
HCC2_COL14_ROW24	6	Macrophages
HCC2_COL14_ROW25	2	Hepatocytes
HCC2_COL14_ROW26	2	Hepatocytes
HCC2_COL14_ROW27	6	Macrophages
HCC2_COL14_ROW28	4	Hepatocytes
HCC2_COL14_ROW29	6	Macrophages
HCC2_COL14_ROW30	6	Macrophages
HCC2_COL14_ROW31	9	Hepatocytes
HCC2_COL14_ROW32	4	Hepatocytes
HCC2_COL14_ROW33	2	Hepatocytes
HCC2_COL14_ROW34	4	Hepatocytes
HCC2_COL14_ROW35	2	Hepatocytes
HCC2_COL14_ROW36	4	Hepatocytes
HCC2_COL14_ROW37	2	Hepatocytes
HCC2_COL14_ROW38	2	Hepatocytes
HCC2_COL14_ROW40	9	Hepatocytes
HCC2_COL15_ROW1	2	Hepatocytes
HCC2_COL15_ROW2	5	CD8+ T cells
HCC2_COL15_ROW3	13	NK cells
HCC2_COL15_ROW4	2	Hepatocytes
HCC2_COL15_ROW5	6	Macrophages
HCC2_COL15_ROW6	2	Hepatocytes
HCC2_COL15_ROW7	4	Hepatocytes
HCC2_COL15_ROW8	6	Macrophages
HCC2_COL15_ROW9	6	Macrophages
HCC2_COL15_ROW10	4	Hepatocytes
HCC2_COL15_ROW11	2	Hepatocytes
HCC2_COL15_ROW12	6	Macrophages
HCC2_COL15_ROW13	2	Hepatocytes
HCC2_COL15_ROW14	2	Hepatocytes
HCC2_COL15_ROW15	4	Hepatocytes
HCC2_COL15_ROW16	9	Hepatocytes
HCC2_COL15_ROW17	4	Hepatocytes
HCC2_COL15_ROW18	4	Hepatocytes
HCC2_COL15_ROW19	4	Hepatocytes
HCC2_COL15_ROW20	6	Macrophages
HCC2_COL15_ROW21	6	Macrophages
HCC2_COL15_ROW22	2	Hepatocytes
HCC2_COL15_ROW23	5	CD8+ T cells
HCC2_COL15_ROW24	6	Macrophages
HCC2_COL15_ROW25	4	Hepatocytes
HCC2_COL15_ROW26	2	Hepatocytes
HCC2_COL15_ROW27	6	Macrophages
HCC2_COL15_ROW28	5	CD8+ T cells
HCC2_COL15_ROW29	2	Hepatocytes
HCC2_COL15_ROW30	13	NK cells
HCC2_COL15_ROW31	2	Hepatocytes
HCC2_COL15_ROW32	6	Macrophages
HCC2_COL15_ROW33	2	Hepatocytes
HCC2_COL15_ROW34	2	Hepatocytes
HCC2_COL15_ROW35	2	Hepatocytes
HCC2_COL15_ROW36	4	Hepatocytes
HCC2_COL15_ROW37	9	Hepatocytes
HCC2_COL15_ROW38	4	Hepatocytes
HCC2_COL15_ROW39	2	Hepatocytes
HCC2_COL15_ROW40	2	Hepatocytes
HCC2_COL16_ROW1	6	Macrophages
HCC2_COL16_ROW2	4	Hepatocytes
HCC2_COL16_ROW3	2	Hepatocytes
HCC2_COL16_ROW4	2	Hepatocytes
HCC2_COL16_ROW5	2	Hepatocytes
HCC2_COL16_ROW6	2	Hepatocytes
HCC2_COL16_ROW7	4	Hepatocytes
HCC2_COL16_ROW8	4	Hepatocytes
HCC2_COL16_ROW9	2	Hepatocytes
HCC2_COL16_ROW10	9	Hepatocytes
HCC2_COL16_ROW11	9	Hepatocytes
HCC2_COL16_ROW12	2	Hepatocytes
HCC2_COL16_ROW13	4	Hepatocytes
HCC2_COL16_ROW14	4	Hepatocytes
HCC2_COL16_ROW15	4	Hepatocytes
HCC2_COL16_ROW16	9	Hepatocytes
HCC2_COL16_ROW17	6	Macrophages
HCC2_COL16_ROW18	2	Hepatocytes
HCC2_COL16_ROW19	5	CD8+ T cells
HCC2_COL16_ROW20	4	Hepatocytes
HCC2_COL16_ROW21	2	Hepatocytes
HCC2_COL16_ROW22	2	Hepatocytes
HCC2_COL16_ROW23	2	Hepatocytes
HCC2_COL16_ROW24	4	Hepatocytes
HCC2_COL16_ROW25	4	Hepatocytes
HCC2_COL16_ROW26	4	Hepatocytes
HCC2_COL16_ROW27	13	NK cells
HCC2_COL16_ROW28	4	Hepatocytes
HCC2_COL16_ROW29	13	NK cells
HCC2_COL16_ROW30	4	Hepatocytes
HCC2_COL16_ROW31	6	Macrophages
HCC2_COL16_ROW32	2	Hepatocytes
HCC2_COL16_ROW33	6	Macrophages
HCC2_COL16_ROW34	4	Hepatocytes
HCC2_COL16_ROW35	2	Hepatocytes
HCC2_COL16_ROW36	2	Hepatocytes
HCC2_COL16_ROW37	6	Macrophages
HCC2_COL16_ROW38	2	Hepatocytes
HCC2_COL16_ROW39	2	Hepatocytes
HCC2_COL16_ROW40	2	Hepatocytes
HCC2_COL17_ROW1	6	Macrophages
HCC2_COL17_ROW2	6	Macrophages
HCC2_COL17_ROW3	6	Macrophages
HCC2_COL17_ROW4	4	Hepatocytes
HCC2_COL17_ROW5	4	Hepatocytes
HCC2_COL17_ROW6	6	Macrophages
HCC2_COL17_ROW7	6	Macrophages
HCC2_COL17_ROW8	6	Macrophages
HCC2_COL17_ROW9	6	Macrophages
HCC2_COL17_ROW10	6	Macrophages
HCC2_COL17_ROW11	2	Hepatocytes
HCC2_COL17_ROW12	4	Hepatocytes
HCC2_COL17_ROW13	2	Hepatocytes
HCC2_COL17_ROW14	4	Hepatocytes
HCC2_COL17_ROW15	2	Hepatocytes
HCC2_COL17_ROW16	13	NK cells
HCC2_COL17_ROW17	2	Hepatocytes
HCC2_COL17_ROW18	2	Hepatocytes
HCC2_COL17_ROW19	6	Macrophages
HCC2_COL17_ROW20	4	Hepatocytes
HCC2_COL17_ROW21	4	Hepatocytes
HCC2_COL17_ROW22	9	Hepatocytes
HCC2_COL17_ROW23	4	Hepatocytes
HCC2_COL17_ROW24	4	Hepatocytes
HCC2_COL17_ROW25	2	Hepatocytes
HCC2_COL17_ROW26	4	Hepatocytes
HCC2_COL17_ROW27	6	Macrophages
HCC2_COL17_ROW28	2	Hepatocytes
HCC2_COL17_ROW29	9	Hepatocytes
HCC2_COL17_ROW30	6	Macrophages
HCC2_COL17_ROW31	2	Hepatocytes
HCC2_COL17_ROW32	2	Hepatocytes
HCC2_COL17_ROW33	6	Macrophages
HCC2_COL17_ROW34	2	Hepatocytes
HCC2_COL17_ROW35	4	Hepatocytes
HCC2_COL17_ROW36	4	Hepatocytes
HCC2_COL17_ROW37	6	Macrophages
HCC2_COL17_ROW38	9	Hepatocytes
HCC2_COL17_ROW40	4	Hepatocytes
HCC2_COL18_ROW1	2	Hepatocytes
HCC2_COL18_ROW2	5	CD8+ T cells
HCC2_COL18_ROW3	4	Hepatocytes
HCC2_COL18_ROW4	4	Hepatocytes
HCC2_COL18_ROW5	4	Hepatocytes
HCC2_COL18_ROW6	9	Hepatocytes
HCC2_COL18_ROW7	4	Hepatocytes
HCC2_COL18_ROW8	2	Hepatocytes
HCC2_COL18_ROW9	9	Hepatocytes
HCC2_COL18_ROW10	2	Hepatocytes
HCC2_COL18_ROW11	2	Hepatocytes
HCC2_COL18_ROW12	6	Macrophages
HCC2_COL18_ROW13	6	Macrophages
HCC2_COL18_ROW14	2	Hepatocytes
HCC2_COL18_ROW15	2	Hepatocytes
HCC2_COL18_ROW16	4	Hepatocytes
HCC2_COL18_ROW17	10	CD8+ T cells
HCC2_COL18_ROW18	4	Hepatocytes
HCC2_COL18_ROW19	2	Hepatocytes
HCC2_COL18_ROW20	6	Macrophages
HCC2_COL18_ROW21	10	CD8+ T cells
HCC2_COL18_ROW22	2	Hepatocytes
HCC2_COL18_ROW23	4	Hepatocytes
HCC2_COL18_ROW24	2	Hepatocytes
HCC2_COL18_ROW25	4	Hepatocytes
HCC2_COL18_ROW26	6	Macrophages
HCC2_COL18_ROW27	6	Macrophages
HCC2_COL18_ROW28	5	CD8+ T cells
HCC2_COL18_ROW29	4	Hepatocytes
HCC2_COL18_ROW30	2	Hepatocytes
HCC2_COL18_ROW31	2	Hepatocytes
HCC2_COL18_ROW32	6	Macrophages
HCC2_COL18_ROW33	2	Hepatocytes
HCC2_COL18_ROW34	4	Hepatocytes
HCC2_COL18_ROW35	6	Macrophages
HCC2_COL18_ROW36	2	Hepatocytes
HCC2_COL18_ROW37	5	CD8+ T cells
HCC2_COL18_ROW38	2	Hepatocytes
HCC2_COL18_ROW40	4	Hepatocytes
HCC2_COL19_ROW1	4	Hepatocytes
HCC2_COL19_ROW2	10	CD8+ T cells
HCC2_COL19_ROW3	6	Macrophages
HCC2_COL19_ROW4	6	Macrophages
HCC2_COL19_ROW5	6	Macrophages
HCC2_COL19_ROW6	2	Hepatocytes
HCC2_COL19_ROW7	5	CD8+ T cells
HCC2_COL19_ROW8	6	Macrophages
HCC2_COL19_ROW9	2	Hepatocytes
HCC2_COL19_ROW10	2	Hepatocytes
HCC2_COL19_ROW11	2	Hepatocytes
HCC2_COL19_ROW12	2	Hepatocytes
HCC2_COL19_ROW13	6	Macrophages
HCC2_COL19_ROW14	2	Hepatocytes
HCC2_COL19_ROW15	2	Hepatocytes
HCC2_COL19_ROW16	2	Hepatocytes
HCC2_COL19_ROW17	2	Hepatocytes
HCC2_COL19_ROW18	2	Hepatocytes
HCC2_COL19_ROW19	2	Hepatocytes
HCC2_COL19_ROW20	2	Hepatocytes
HCC2_COL19_ROW21	2	Hepatocytes
HCC2_COL19_ROW22	9	Hepatocytes
HCC2_COL19_ROW23	2	Hepatocytes
HCC2_COL19_ROW24	4	Hepatocytes
HCC2_COL19_ROW25	6	Macrophages
HCC2_COL19_ROW26	2	Hepatocytes
HCC2_COL19_ROW27	2	Hepatocytes
HCC2_COL19_ROW28	2	Hepatocytes
HCC2_COL19_ROW29	4	Hepatocytes
HCC2_COL19_ROW30	2	Hepatocytes
HCC2_COL19_ROW31	6	Macrophages
HCC2_COL19_ROW32	6	Macrophages
HCC2_COL19_ROW33	2	Hepatocytes
HCC2_COL19_ROW34	2	Hepatocytes
HCC2_COL19_ROW35	4	Hepatocytes
HCC2_COL19_ROW36	2	Hepatocytes
HCC2_COL19_ROW37	4	Hepatocytes
HCC2_COL19_ROW38	2	Hepatocytes
HCC2_COL19_ROW39	2	Hepatocytes
HCC2_COL19_ROW40	2	Hepatocytes
HCC2_COL20_ROW1	2	Hepatocytes
HCC2_COL20_ROW2	4	Hepatocytes
HCC2_COL20_ROW3	2	Hepatocytes
HCC2_COL20_ROW4	2	Hepatocytes
HCC2_COL20_ROW5	6	Macrophages
HCC2_COL20_ROW6	2	Hepatocytes
HCC2_COL20_ROW7	2	Hepatocytes
HCC2_COL20_ROW8	6	Macrophages
HCC2_COL20_ROW9	2	Hepatocytes
HCC2_COL20_ROW10	2	Hepatocytes
HCC2_COL20_ROW11	6	Macrophages
HCC2_COL20_ROW12	2	Hepatocytes
HCC2_COL20_ROW13	6	Macrophages
HCC2_COL20_ROW14	4	Hepatocytes
HCC2_COL20_ROW15	4	Hepatocytes
HCC2_COL20_ROW16	4	Hepatocytes
HCC2_COL20_ROW17	5	CD8+ T cells
HCC2_COL20_ROW18	6	Macrophages
HCC2_COL20_ROW19	2	Hepatocytes
HCC2_COL20_ROW20	6	Macrophages
HCC2_COL20_ROW21	2	Hepatocytes
HCC2_COL20_ROW22	2	Hepatocytes
HCC2_COL20_ROW23	2	Hepatocytes
HCC2_COL20_ROW24	9	Hepatocytes
HCC2_COL20_ROW25	4	Hepatocytes
HCC2_COL20_ROW26	2	Hepatocytes
HCC2_COL20_ROW27	2	Hepatocytes
HCC2_COL20_ROW28	4	Hepatocytes
HCC2_COL20_ROW29	4	Hepatocytes
HCC2_COL20_ROW30	6	Macrophages
HCC2_COL20_ROW31	6	Macrophages
HCC2_COL20_ROW32	2	Hepatocytes
HCC2_COL20_ROW33	4	Hepatocytes
HCC2_COL20_ROW34	4	Hepatocytes
HCC2_COL20_ROW35	4	Hepatocytes
HCC2_COL20_ROW36	6	Macrophages
HCC2_COL20_ROW37	2	Hepatocytes
HCC2_COL20_ROW38	4	Hepatocytes
HCC2_COL20_ROW40	4	Hepatocytes
HCC5_COL1_ROW1	7	B-cells
HCC5_COL1_ROW2	10	CD8+ T cells
HCC5_COL1_ROW3	5	CD8+ T cells
HCC5_COL1_ROW4	7	B-cells
HCC5_COL1_ROW5	7	B-cells
HCC5_COL1_ROW6	7	B-cells
HCC5_COL1_ROW7	7	B-cells
HCC5_COL1_ROW8	3	Hepatocytes
HCC5_COL1_ROW9	5	CD8+ T cells
HCC5_COL1_ROW10	3	Hepatocytes
HCC5_COL1_ROW11	10	CD8+ T cells
HCC5_COL1_ROW12	7	B-cells
HCC5_COL1_ROW13	5	CD8+ T cells
HCC5_COL1_ROW14	3	Hepatocytes
HCC5_COL1_ROW15	7	B-cells
HCC5_COL1_ROW16	5	CD8+ T cells
HCC5_COL1_ROW17	3	Hepatocytes
HCC5_COL1_ROW18	5	CD8+ T cells
HCC5_COL1_ROW19	5	CD8+ T cells
HCC5_COL1_ROW20	10	CD8+ T cells
HCC5_COL1_ROW21	10	CD8+ T cells
HCC5_COL1_ROW22	5	CD8+ T cells
HCC5_COL1_ROW23	12	Hepatocytes
HCC5_COL1_ROW24	7	B-cells
HCC5_COL1_ROW25	3	Hepatocytes
HCC5_COL1_ROW26	3	Hepatocytes
HCC5_COL1_ROW27	5	CD8+ T cells
HCC5_COL1_ROW28	12	Hepatocytes
HCC5_COL1_ROW29	7	B-cells
HCC5_COL1_ROW30	3	Hepatocytes
HCC5_COL1_ROW31	5	CD8+ T cells
HCC5_COL1_ROW32	5	CD8+ T cells
HCC5_COL1_ROW33	6	Macrophages
HCC5_COL1_ROW34	5	CD8+ T cells
HCC5_COL1_ROW35	3	Hepatocytes
HCC5_COL1_ROW36	6	Macrophages
HCC5_COL1_ROW37	10	CD8+ T cells
HCC5_COL1_ROW38	10	CD8+ T cells
HCC5_COL1_ROW39	7	B-cells
HCC5_COL1_ROW40	12	Hepatocytes
HCC5_COL2_ROW1	3	Hepatocytes
HCC5_COL2_ROW2	3	Hepatocytes
HCC5_COL2_ROW3	10	CD8+ T cells
HCC5_COL2_ROW4	7	B-cells
HCC5_COL2_ROW5	3	Hepatocytes
HCC5_COL2_ROW6	5	CD8+ T cells
HCC5_COL2_ROW7	5	CD8+ T cells
HCC5_COL2_ROW8	3	Hepatocytes
HCC5_COL2_ROW9	7	B-cells
HCC5_COL2_ROW10	3	Hepatocytes
HCC5_COL2_ROW11	13	NK cells
HCC5_COL2_ROW12	3	Hepatocytes
HCC5_COL2_ROW13	5	CD8+ T cells
HCC5_COL2_ROW14	12	Hepatocytes
HCC5_COL2_ROW15	5	CD8+ T cells
HCC5_COL2_ROW16	3	Hepatocytes
HCC5_COL2_ROW17	3	Hepatocytes
HCC5_COL2_ROW18	5	CD8+ T cells
HCC5_COL2_ROW19	7	B-cells
HCC5_COL2_ROW20	5	CD8+ T cells
HCC5_COL2_ROW21	5	CD8+ T cells
HCC5_COL2_ROW22	5	CD8+ T cells
HCC5_COL2_ROW23	12	Hepatocytes
HCC5_COL2_ROW24	3	Hepatocytes
HCC5_COL2_ROW25	3	Hepatocytes
HCC5_COL2_ROW26	5	CD8+ T cells
HCC5_COL2_ROW27	5	CD8+ T cells
HCC5_COL2_ROW28	3	Hepatocytes
HCC5_COL2_ROW29	3	Hepatocytes
HCC5_COL2_ROW30	3	Hepatocytes
HCC5_COL2_ROW31	12	Hepatocytes
HCC5_COL2_ROW32	12	Hepatocytes
HCC5_COL2_ROW33	7	B-cells
HCC5_COL2_ROW34	5	CD8+ T cells
HCC5_COL2_ROW35	12	Hepatocytes
HCC5_COL2_ROW36	10	CD8+ T cells
HCC5_COL2_ROW37	10	CD8+ T cells
HCC5_COL2_ROW38	3	Hepatocytes
HCC5_COL2_ROW39	3	Hepatocytes
HCC5_COL2_ROW40	5	CD8+ T cells
HCC5_COL3_ROW1	5	CD8+ T cells
HCC5_COL3_ROW2	5	CD8+ T cells
HCC5_COL3_ROW3	5	CD8+ T cells
HCC5_COL3_ROW4	6	Macrophages
HCC5_COL3_ROW5	6	Macrophages
HCC5_COL3_ROW6	13	NK cells
HCC5_COL3_ROW7	3	Hepatocytes
HCC5_COL3_ROW8	3	Hepatocytes
HCC5_COL3_ROW9	3	Hepatocytes
HCC5_COL3_ROW10	5	CD8+ T cells
HCC5_COL3_ROW11	7	B-cells
HCC5_COL3_ROW12	3	Hepatocytes
HCC5_COL3_ROW13	6	Macrophages
HCC5_COL3_ROW14	5	CD8+ T cells
HCC5_COL3_ROW15	5	CD8+ T cells
HCC5_COL3_ROW16	5	CD8+ T cells
HCC5_COL3_ROW17	7	B-cells
HCC5_COL3_ROW18	12	Hepatocytes
HCC5_COL3_ROW19	3	Hepatocytes
HCC5_COL3_ROW20	10	CD8+ T cells
HCC5_COL3_ROW21	5	CD8+ T cells
HCC5_COL3_ROW22	3	Hepatocytes
HCC5_COL3_ROW23	7	B-cells
HCC5_COL3_ROW24	5	CD8+ T cells
HCC5_COL3_ROW25	7	B-cells
HCC5_COL3_ROW26	5	CD8+ T cells
HCC5_COL3_ROW27	10	CD8+ T cells
HCC5_COL3_ROW28	3	Hepatocytes
HCC5_COL3_ROW29	7	B-cells
HCC5_COL3_ROW30	5	CD8+ T cells
HCC5_COL3_ROW31	3	Hepatocytes
HCC5_COL3_ROW32	7	B-cells
HCC5_COL3_ROW33	12	Hepatocytes
HCC5_COL3_ROW34	7	B-cells
HCC5_COL3_ROW35	3	Hepatocytes
HCC5_COL3_ROW36	10	CD8+ T cells
HCC5_COL3_ROW37	12	Hepatocytes
HCC5_COL3_ROW38	3	Hepatocytes
HCC5_COL3_ROW39	5	CD8+ T cells
HCC5_COL3_ROW40	3	Hepatocytes
HCC5_COL4_ROW1	13	NK cells
HCC5_COL4_ROW2	5	CD8+ T cells
HCC5_COL4_ROW3	3	Hepatocytes
HCC5_COL4_ROW4	7	B-cells
HCC5_COL4_ROW5	6	Macrophages
HCC5_COL4_ROW6	7	B-cells
HCC5_COL4_ROW7	3	Hepatocytes
HCC5_COL4_ROW8	7	B-cells
HCC5_COL4_ROW9	3	Hepatocytes
HCC5_COL4_ROW10	7	B-cells
HCC5_COL4_ROW11	7	B-cells
HCC5_COL4_ROW12	5	CD8+ T cells
HCC5_COL4_ROW13	7	B-cells
HCC5_COL4_ROW14	5	CD8+ T cells
HCC5_COL4_ROW15	3	Hepatocytes
HCC5_COL4_ROW16	5	CD8+ T cells
HCC5_COL4_ROW17	7	B-cells
HCC5_COL4_ROW18	5	CD8+ T cells
HCC5_COL4_ROW19	7	B-cells
HCC5_COL4_ROW20	3	Hepatocytes
HCC5_COL4_ROW21	12	Hepatocytes
HCC5_COL4_ROW22	5	CD8+ T cells
HCC5_COL4_ROW23	10	CD8+ T cells
HCC5_COL4_ROW24	3	Hepatocytes
HCC5_COL4_ROW25	5	CD8+ T cells
HCC5_COL4_ROW26	7	B-cells
HCC5_COL4_ROW27	3	Hepatocytes
HCC5_COL4_ROW28	6	Macrophages
HCC5_COL4_ROW29	7	B-cells
HCC5_COL4_ROW30	3	Hepatocytes
HCC5_COL4_ROW31	6	Macrophages
HCC5_COL4_ROW32	12	Hepatocytes
HCC5_COL4_ROW33	5	CD8+ T cells
HCC5_COL4_ROW34	10	CD8+ T cells
HCC5_COL4_ROW35	3	Hepatocytes
HCC5_COL4_ROW36	5	CD8+ T cells
HCC5_COL4_ROW37	3	Hepatocytes
HCC5_COL4_ROW38	3	Hepatocytes
HCC5_COL4_ROW39	3	Hepatocytes
HCC5_COL4_ROW40	7	B-cells
HCC5_COL5_ROW1	5	CD8+ T cells
HCC5_COL5_ROW2	7	B-cells
HCC5_COL5_ROW3	12	Hepatocytes
HCC5_COL5_ROW4	10	CD8+ T cells
HCC5_COL5_ROW5	7	B-cells
HCC5_COL5_ROW7	5	CD8+ T cells
HCC5_COL5_ROW8	10	CD8+ T cells
HCC5_COL5_ROW9	7	B-cells
HCC5_COL5_ROW10	3	Hepatocytes
HCC5_COL5_ROW12	3	Hepatocytes
HCC5_COL5_ROW13	10	CD8+ T cells
HCC5_COL5_ROW14	3	Hepatocytes
HCC5_COL5_ROW15	3	Hepatocytes
HCC5_COL5_ROW16	5	CD8+ T cells
HCC5_COL5_ROW17	12	Hepatocytes
HCC5_COL5_ROW18	5	CD8+ T cells
HCC5_COL5_ROW19	7	B-cells
HCC5_COL5_ROW20	3	Hepatocytes
HCC5_COL5_ROW21	5	CD8+ T cells
HCC5_COL5_ROW22	5	CD8+ T cells
HCC5_COL5_ROW26	3	Hepatocytes
HCC5_COL5_ROW27	3	Hepatocytes
HCC5_COL5_ROW28	7	B-cells
HCC5_COL5_ROW29	3	Hepatocytes
HCC5_COL5_ROW30	7	B-cells
HCC5_COL5_ROW31	10	CD8+ T cells
HCC5_COL5_ROW32	6	Macrophages
HCC5_COL5_ROW33	10	CD8+ T cells
HCC5_COL5_ROW34	7	B-cells
HCC5_COL5_ROW35	5	CD8+ T cells
HCC5_COL5_ROW36	7	B-cells
HCC5_COL5_ROW37	3	Hepatocytes
HCC5_COL5_ROW38	7	B-cells
HCC5_COL5_ROW39	7	B-cells
HCC5_COL5_ROW40	7	B-cells
HCC5_COL6_ROW1	7	B-cells
HCC5_COL6_ROW2	5	CD8+ T cells
HCC5_COL6_ROW3	3	Hepatocytes
HCC5_COL6_ROW4	12	Hepatocytes
HCC5_COL6_ROW5	12	Hepatocytes
HCC5_COL6_ROW6	7	B-cells
HCC5_COL6_ROW7	3	Hepatocytes
HCC5_COL6_ROW8	7	B-cells
HCC5_COL6_ROW9	5	CD8+ T cells
HCC5_COL6_ROW10	5	CD8+ T cells
HCC5_COL6_ROW11	3	Hepatocytes
HCC5_COL6_ROW12	5	CD8+ T cells
HCC5_COL6_ROW13	12	Hepatocytes
HCC5_COL6_ROW14	5	CD8+ T cells
HCC5_COL6_ROW15	10	CD8+ T cells
HCC5_COL6_ROW16	7	B-cells
HCC5_COL6_ROW17	3	Hepatocytes
HCC5_COL6_ROW18	12	Hepatocytes
HCC5_COL6_ROW19	7	B-cells
HCC5_COL6_ROW20	3	Hepatocytes
HCC5_COL6_ROW21	5	CD8+ T cells
HCC5_COL6_ROW22	5	CD8+ T cells
HCC5_COL6_ROW23	5	CD8+ T cells
HCC5_COL6_ROW24	7	B-cells
HCC5_COL6_ROW25	5	CD8+ T cells
HCC5_COL6_ROW26	3	Hepatocytes
HCC5_COL6_ROW27	10	CD8+ T cells
HCC5_COL6_ROW28	3	Hepatocytes
HCC5_COL6_ROW29	3	Hepatocytes
HCC5_COL6_ROW30	3	Hepatocytes
HCC5_COL6_ROW31	10	CD8+ T cells
HCC5_COL6_ROW32	5	CD8+ T cells
HCC5_COL6_ROW33	3	Hepatocytes
HCC5_COL6_ROW34	5	CD8+ T cells
HCC5_COL6_ROW35	6	Macrophages
HCC5_COL6_ROW36	5	CD8+ T cells
HCC5_COL6_ROW37	12	Hepatocytes
HCC5_COL6_ROW38	7	B-cells
HCC5_COL6_ROW39	7	B-cells
HCC5_COL6_ROW40	7	B-cells
HCC5_COL7_ROW1	7	B-cells
HCC5_COL7_ROW2	7	B-cells
HCC5_COL7_ROW3	12	Hepatocytes
HCC5_COL7_ROW4	10	CD8+ T cells
HCC5_COL7_ROW5	5	CD8+ T cells
HCC5_COL7_ROW6	3	Hepatocytes
HCC5_COL7_ROW7	5	CD8+ T cells
HCC5_COL7_ROW8	3	Hepatocytes
HCC5_COL7_ROW9	7	B-cells
HCC5_COL7_ROW10	3	Hepatocytes
HCC5_COL7_ROW11	3	Hepatocytes
HCC5_COL7_ROW12	7	B-cells
HCC5_COL7_ROW13	5	CD8+ T cells
HCC5_COL7_ROW14	6	Macrophages
HCC5_COL7_ROW15	7	B-cells
HCC5_COL7_ROW16	3	Hepatocytes
HCC5_COL7_ROW17	7	B-cells
HCC5_COL7_ROW18	5	CD8+ T cells
HCC5_COL7_ROW19	7	B-cells
HCC5_COL7_ROW20	5	CD8+ T cells
HCC5_COL7_ROW21	3	Hepatocytes
HCC5_COL7_ROW22	10	CD8+ T cells
HCC5_COL7_ROW23	12	Hepatocytes
HCC5_COL7_ROW24	3	Hepatocytes
HCC5_COL7_ROW25	3	Hepatocytes
HCC5_COL7_ROW26	5	CD8+ T cells
HCC5_COL7_ROW27	3	Hepatocytes
HCC5_COL7_ROW28	3	Hepatocytes
HCC5_COL7_ROW29	7	B-cells
HCC5_COL7_ROW30	7	B-cells
HCC5_COL7_ROW31	5	CD8+ T cells
HCC5_COL7_ROW32	7	B-cells
HCC5_COL7_ROW33	12	Hepatocytes
HCC5_COL7_ROW34	7	B-cells
HCC5_COL7_ROW35	7	B-cells
HCC5_COL7_ROW36	7	B-cells
HCC5_COL7_ROW37	3	Hepatocytes
HCC5_COL7_ROW38	3	Hepatocytes
HCC5_COL7_ROW39	3	Hepatocytes
HCC5_COL7_ROW40	3	Hepatocytes
HCC5_COL8_ROW1	10	CD8+ T cells
HCC5_COL8_ROW2	5	CD8+ T cells
HCC5_COL8_ROW3	3	Hepatocytes
HCC5_COL8_ROW4	3	Hepatocytes
HCC5_COL8_ROW5	5	CD8+ T cells
HCC5_COL8_ROW6	7	B-cells
HCC5_COL8_ROW7	5	CD8+ T cells
HCC5_COL8_ROW8	3	Hepatocytes
HCC5_COL8_ROW9	10	CD8+ T cells
HCC5_COL8_ROW10	5	CD8+ T cells
HCC5_COL8_ROW11	3	Hepatocytes
HCC5_COL8_ROW12	3	Hepatocytes
HCC5_COL8_ROW13	3	Hepatocytes
HCC5_COL8_ROW14	10	CD8+ T cells
HCC5_COL8_ROW15	7	B-cells
HCC5_COL8_ROW16	10	CD8+ T cells
HCC5_COL8_ROW17	3	Hepatocytes
HCC5_COL8_ROW18	10	CD8+ T cells
HCC5_COL8_ROW19	5	CD8+ T cells
HCC5_COL8_ROW20	3	Hepatocytes
HCC5_COL8_ROW21	3	Hepatocytes
HCC5_COL8_ROW22	7	B-cells
HCC5_COL8_ROW23	7	B-cells
HCC5_COL8_ROW24	9	Hepatocytes
HCC5_COL8_ROW25	5	CD8+ T cells
HCC5_COL8_ROW26	12	Hepatocytes
HCC5_COL8_ROW27	3	Hepatocytes
HCC5_COL8_ROW28	7	B-cells
HCC5_COL8_ROW29	3	Hepatocytes
HCC5_COL8_ROW30	3	Hepatocytes
HCC5_COL8_ROW31	5	CD8+ T cells
HCC5_COL8_ROW32	5	CD8+ T cells
HCC5_COL8_ROW33	5	CD8+ T cells
HCC5_COL8_ROW34	3	Hepatocytes
HCC5_COL8_ROW35	3	Hepatocytes
HCC5_COL8_ROW36	5	CD8+ T cells
HCC5_COL8_ROW37	3	Hepatocytes
HCC5_COL8_ROW38	3	Hepatocytes
HCC5_COL8_ROW39	3	Hepatocytes
HCC5_COL8_ROW40	7	B-cells
HCC5_COL9_ROW1	3	Hepatocytes
HCC5_COL9_ROW2	3	Hepatocytes
HCC5_COL9_ROW3	7	B-cells
HCC5_COL9_ROW4	12	Hepatocytes
HCC5_COL9_ROW5	3	Hepatocytes
HCC5_COL9_ROW6	5	CD8+ T cells
HCC5_COL9_ROW7	6	Macrophages
HCC5_COL9_ROW8	3	Hepatocytes
HCC5_COL9_ROW9	3	Hepatocytes
HCC5_COL9_ROW10	10	CD8+ T cells
HCC5_COL9_ROW11	7	B-cells
HCC5_COL9_ROW12	7	B-cells
HCC5_COL9_ROW13	3	Hepatocytes
HCC5_COL9_ROW14	7	B-cells
HCC5_COL9_ROW15	5	CD8+ T cells
HCC5_COL9_ROW16	5	CD8+ T cells
HCC5_COL9_ROW17	5	CD8+ T cells
HCC5_COL9_ROW18	5	CD8+ T cells
HCC5_COL9_ROW19	3	Hepatocytes
HCC5_COL9_ROW20	7	B-cells
HCC5_COL9_ROW21	7	B-cells
HCC5_COL9_ROW22	12	Hepatocytes
HCC5_COL9_ROW23	7	B-cells
HCC5_COL9_ROW24	3	Hepatocytes
HCC5_COL9_ROW25	3	Hepatocytes
HCC5_COL9_ROW26	10	CD8+ T cells
HCC5_COL9_ROW27	12	Hepatocytes
HCC5_COL9_ROW28	3	Hepatocytes
HCC5_COL9_ROW29	3	Hepatocytes
HCC5_COL9_ROW30	7	B-cells
HCC5_COL9_ROW31	5	CD8+ T cells
HCC5_COL9_ROW32	5	CD8+ T cells
HCC5_COL9_ROW33	5	CD8+ T cells
HCC5_COL9_ROW34	3	Hepatocytes
HCC5_COL9_ROW35	5	CD8+ T cells
HCC5_COL9_ROW36	3	Hepatocytes
HCC5_COL9_ROW37	3	Hepatocytes
HCC5_COL9_ROW38	12	Hepatocytes
HCC5_COL9_ROW39	3	Hepatocytes
HCC5_COL9_ROW40	5	CD8+ T cells
HCC5_COL10_ROW1	7	B-cells
HCC5_COL10_ROW2	5	CD8+ T cells
HCC5_COL10_ROW3	7	B-cells
HCC5_COL10_ROW4	5	CD8+ T cells
HCC5_COL10_ROW5	5	CD8+ T cells
HCC5_COL10_ROW6	3	Hepatocytes
HCC5_COL10_ROW7	13	NK cells
HCC5_COL10_ROW8	12	Hepatocytes
HCC5_COL10_ROW9	7	B-cells
HCC5_COL10_ROW10	10	CD8+ T cells
HCC5_COL10_ROW11	10	CD8+ T cells
HCC5_COL10_ROW12	7	B-cells
HCC5_COL10_ROW13	7	B-cells
HCC5_COL10_ROW14	7	B-cells
HCC5_COL10_ROW15	3	Hepatocytes
HCC5_COL10_ROW16	5	CD8+ T cells
HCC5_COL10_ROW17	3	Hepatocytes
HCC5_COL10_ROW18	7	B-cells
HCC5_COL10_ROW19	6	Macrophages
HCC5_COL10_ROW20	10	CD8+ T cells
HCC5_COL10_ROW21	10	CD8+ T cells
HCC5_COL10_ROW22	5	CD8+ T cells
HCC5_COL10_ROW23	5	CD8+ T cells
HCC5_COL10_ROW24	3	Hepatocytes
HCC5_COL10_ROW25	7	B-cells
HCC5_COL10_ROW26	7	B-cells
HCC5_COL10_ROW27	3	Hepatocytes
HCC5_COL10_ROW28	7	B-cells
HCC5_COL10_ROW29	3	Hepatocytes
HCC5_COL10_ROW30	3	Hepatocytes
HCC5_COL10_ROW31	3	Hepatocytes
HCC5_COL10_ROW32	12	Hepatocytes
HCC5_COL10_ROW33	7	B-cells
HCC5_COL10_ROW34	12	Hepatocytes
HCC5_COL10_ROW35	7	B-cells
HCC5_COL10_ROW36	10	CD8+ T cells
HCC5_COL10_ROW37	5	CD8+ T cells
HCC5_COL10_ROW38	3	Hepatocytes
HCC5_COL10_ROW39	3	Hepatocytes
HCC5_COL10_ROW40	7	B-cells
HCC5_COL11_ROW1	3	Hepatocytes
HCC5_COL11_ROW2	5	CD8+ T cells
HCC5_COL11_ROW3	3	Hepatocytes
HCC5_COL11_ROW4	3	Hepatocytes
HCC5_COL11_ROW5	10	CD8+ T cells
HCC5_COL11_ROW6	3	Hepatocytes
HCC5_COL11_ROW7	3	Hepatocytes
HCC5_COL11_ROW8	5	CD8+ T cells
HCC5_COL11_ROW9	3	Hepatocytes
HCC5_COL11_ROW10	7	B-cells
HCC5_COL11_ROW11	5	CD8+ T cells
HCC5_COL11_ROW12	12	Hepatocytes
HCC5_COL11_ROW13	6	Macrophages
HCC5_COL11_ROW14	7	B-cells
HCC5_COL11_ROW15	3	Hepatocytes
HCC5_COL11_ROW16	5	CD8+ T cells
HCC5_COL11_ROW17	10	CD8+ T cells
[truncated: 1,183 more rows]

## Sheet: Table S10
Table S10: CellChat Network
source	target	ligand	receptor	prob	pval	interaction_name	interaction_name_2	pathway_name	annotation	evidence
Hepatocytes	B-cells	VEGFA	FLT1	0.000559052	0	VEGFA_VEGFR1	VEGFA - VEGFR1	VEGF	Secreted Signaling	KEGG: hsa04370; PMID: 16633338
Hepatocytes	CD8+ T cells	VEGFA	FLT1	0.000365771	0	VEGFA_VEGFR1	VEGFA - VEGFR1	VEGF	Secreted Signaling	KEGG: hsa04370; PMID: 16633338
Hepatocytes	Hepatocytes	VEGFA	FLT1	0.00021804	0	VEGFA_VEGFR1	VEGFA - VEGFR1	VEGF	Secreted Signaling	KEGG: hsa04370; PMID: 16633338
Hepatocytes	Macrophages	VEGFA	FLT1	0.000467875	0	VEGFA_VEGFR1	VEGFA - VEGFR1	VEGF	Secreted Signaling	KEGG: hsa04370; PMID: 16633338
Hepatocytes	B-cells	VEGFB	FLT1	4.88424e-05	0	VEGFB_VEGFR1	VEGFB - VEGFR1	VEGF	Secreted Signaling	KEGG: hsa04370; PMID: 16633338
Macrophages	B-cells	VEGFB	FLT1	0.000146897	0	VEGFB_VEGFR1	VEGFB - VEGFR1	VEGF	Secreted Signaling	KEGG: hsa04370; PMID: 16633338
Hepatocytes	CD8+ T cells	VEGFB	FLT1	3.19505e-05	0	VEGFB_VEGFR1	VEGFB - VEGFR1	VEGF	Secreted Signaling	KEGG: hsa04370; PMID: 16633338
Macrophages	CD8+ T cells	VEGFB	FLT1	9.60969e-05	0	VEGFB_VEGFR1	VEGFB - VEGFR1	VEGF	Secreted Signaling	KEGG: hsa04370; PMID: 16633338
Macrophages	Hepatocytes	VEGFB	FLT1	5.72781e-05	0.01	VEGFB_VEGFR1	VEGFB - VEGFR1	VEGF	Secreted Signaling	KEGG: hsa04370; PMID: 16633338
Hepatocytes	Macrophages	VEGFB	FLT1	4.08732e-05	0	VEGFB_VEGFR1	VEGFB - VEGFR1	VEGF	Secreted Signaling	KEGG: hsa04370; PMID: 16633338
Macrophages	Macrophages	VEGFB	FLT1	0.000122931	0	VEGFB_VEGFR1	VEGFB - VEGFR1	VEGF	Secreted Signaling	KEGG: hsa04370; PMID: 16633338
Macrophages	NK cells	VEGFB	FLT1	6.75205e-05	0.03	VEGFB_VEGFR1	VEGFB - VEGFR1	VEGF	Secreted Signaling	KEGG: hsa04370; PMID: 16633338
B-cells	Macrophages	CCL5	CCR1	0.00239932	0	CCL5_CCR1	CCL5 - CCR1	CCL	Secreted Signaling	KEGG: hsa04060
CD8+ T cells	Macrophages	CCL5	CCR1	0.00928264	0	CCL5_CCR1	CCL5 - CCR1	CCL	Secreted Signaling	KEGG: hsa04060
Hepatocytes	Macrophages	CCL5	CCR1	0.000141945	0	CCL5_CCR1	CCL5 - CCR1	CCL	Secreted Signaling	KEGG: hsa04060
Macrophages	Macrophages	CCL5	CCR1	0.000425056	0	CCL5_CCR1	CCL5 - CCR1	CCL	Secreted Signaling	KEGG: hsa04060
NK cells	Macrophages	CCL5	CCR1	0.0158179	0	CCL5_CCR1	CCL5 - CCR1	CCL	Secreted Signaling	KEGG: hsa04060
B-cells	Macrophages	CCL3	CCR1	8.77923e-05	0	CCL3_CCR1	CCL3 - CCR1	CCL	Secreted Signaling	KEGG: hsa04060
CD8+ T cells	Macrophages	CCL3	CCR1	0.000288303	0	CCL3_CCR1	CCL3 - CCR1	CCL	Secreted Signaling	KEGG: hsa04060
Macrophages	Macrophages	CCL3	CCR1	0.00131601	0	CCL3_CCR1	CCL3 - CCR1	CCL	Secreted Signaling	KEGG: hsa04060
NK cells	Macrophages	CCL3	CCR1	0.00300423	0	CCL3_CCR1	CCL3 - CCR1	CCL	Secreted Signaling	KEGG: hsa04060
Hepatocytes	Macrophages	CCL16	CCR1	0.000484654	0	CCL16_CCR1	CCL16 - CCR1	CCL	Secreted Signaling	KEGG: hsa04060
B-cells	B-cells	MIF	CD74_CXCR4	0.0553185	0	MIF_CD74_CXCR4	MIF - (CD74+CXCR4)	MIF	Secreted Signaling	PMID: 29637711; PMID: 24760155
CD8+ T cells	B-cells	MIF	CD74_CXCR4	0.0471691	0	MIF_CD74_CXCR4	MIF - (CD74+CXCR4)	MIF	Secreted Signaling	PMID: 29637711; PMID: 24760155
Hepatocytes	B-cells	MIF	CD74_CXCR4	0.0252995	0	MIF_CD74_CXCR4	MIF - (CD74+CXCR4)	MIF	Secreted Signaling	PMID: 29637711; PMID: 24760155
Macrophages	B-cells	MIF	CD74_CXCR4	0.0330773	0	MIF_CD74_CXCR4	MIF - (CD74+CXCR4)	MIF	Secreted Signaling	PMID: 29637711; PMID: 24760155
NK cells	B-cells	MIF	CD74_CXCR4	0.0660273	0	MIF_CD74_CXCR4	MIF - (CD74+CXCR4)	MIF	Secreted Signaling	PMID: 29637711; PMID: 24760155
B-cells	CD8+ T cells	MIF	CD74_CXCR4	0.0426581	0	MIF_CD74_CXCR4	MIF - (CD74+CXCR4)	MIF	Secreted Signaling	PMID: 29637711; PMID: 24760155
CD8+ T cells	CD8+ T cells	MIF	CD74_CXCR4	0.0363021	0	MIF_CD74_CXCR4	MIF - (CD74+CXCR4)	MIF	Secreted Signaling	PMID: 29637711; PMID: 24760155
Hepatocytes	CD8+ T cells	MIF	CD74_CXCR4	0.0193686	0	MIF_CD74_CXCR4	MIF - (CD74+CXCR4)	MIF	Secreted Signaling	PMID: 29637711; PMID: 24760155
Macrophages	CD8+ T cells	MIF	CD74_CXCR4	0.0253704	0	MIF_CD74_CXCR4	MIF - (CD74+CXCR4)	MIF	Secreted Signaling	PMID: 29637711; PMID: 24760155
NK cells	CD8+ T cells	MIF	CD74_CXCR4	0.0510485	0	MIF_CD74_CXCR4	MIF - (CD74+CXCR4)	MIF	Secreted Signaling	PMID: 29637711; PMID: 24760155
B-cells	Macrophages	MIF	CD74_CXCR4	0.0194984	0	MIF_CD74_CXCR4	MIF - (CD74+CXCR4)	MIF	Secreted Signaling	PMID: 29637711; PMID: 24760155
CD8+ T cells	Macrophages	MIF	CD74_CXCR4	0.0165336	0	MIF_CD74_CXCR4	MIF - (CD74+CXCR4)	MIF	Secreted Signaling	PMID: 29637711; PMID: 24760155
Hepatocytes	Macrophages	MIF	CD74_CXCR4	0.00873769	0	MIF_CD74_CXCR4	MIF - (CD74+CXCR4)	MIF	Secreted Signaling	PMID: 29637711; PMID: 24760155
Macrophages	Macrophages	MIF	CD74_CXCR4	0.0114839	0	MIF_CD74_CXCR4	MIF - (CD74+CXCR4)	MIF	Secreted Signaling	PMID: 29637711; PMID: 24760155
NK cells	Macrophages	MIF	CD74_CXCR4	0.0234451	0	MIF_CD74_CXCR4	MIF - (CD74+CXCR4)	MIF	Secreted Signaling	PMID: 29637711; PMID: 24760155
B-cells	NK cells	MIF	CD74_CXCR4	0.0173859	0	MIF_CD74_CXCR4	MIF - (CD74+CXCR4)	MIF	Secreted Signaling	PMID: 29637711; PMID: 24760155
CD8+ T cells	NK cells	MIF	CD74_CXCR4	0.0147374	0	MIF_CD74_CXCR4	MIF - (CD74+CXCR4)	MIF	Secreted Signaling	PMID: 29637711; PMID: 24760155
Hepatocytes	NK cells	MIF	CD74_CXCR4	0.00778175	0.02	MIF_CD74_CXCR4	MIF - (CD74+CXCR4)	MIF	Secreted Signaling	PMID: 29637711; PMID: 24760155
Macrophages	NK cells	MIF	CD74_CXCR4	0.0102306	0.01	MIF_CD74_CXCR4	MIF - (CD74+CXCR4)	MIF	Secreted Signaling	PMID: 29637711; PMID: 24760155
NK cells	NK cells	MIF	CD74_CXCR4	0.0209141	0.01	MIF_CD74_CXCR4	MIF - (CD74+CXCR4)	MIF	Secreted Signaling	PMID: 29637711; PMID: 24760155
B-cells	B-cells	MIF	CD74_CD44	0.0149257	0	MIF_CD74_CD44	MIF - (CD74+CD44)	MIF	Secreted Signaling	PMID: 29637711; PMID: 26175090
CD8+ T cells	B-cells	MIF	CD74_CD44	0.0126472	0	MIF_CD74_CD44	MIF - (CD74+CD44)	MIF	Secreted Signaling	PMID: 29637711; PMID: 26175090
Hepatocytes	B-cells	MIF	CD74_CD44	0.00667139	0	MIF_CD74_CD44	MIF - (CD74+CD44)	MIF	Secreted Signaling	PMID: 29637711; PMID: 26175090
Macrophages	B-cells	MIF	CD74_CD44	0.00877389	0	MIF_CD74_CD44	MIF - (CD74+CD44)	MIF	Secreted Signaling	PMID: 29637711; PMID: 26175090
NK cells	B-cells	MIF	CD74_CD44	0.0179638	0	MIF_CD74_CD44	MIF - (CD74+CD44)	MIF	Secreted Signaling	PMID: 29637711; PMID: 26175090
B-cells	CD8+ T cells	MIF	CD74_CD44	0.0303781	0	MIF_CD74_CD44	MIF - (CD74+CD44)	MIF	Secreted Signaling	PMID: 29637711; PMID: 26175090
CD8+ T cells	CD8+ T cells	MIF	CD74_CD44	0.0258025	0	MIF_CD74_CD44	MIF - (CD74+CD44)	MIF	Secreted Signaling	PMID: 29637711; PMID: 26175090
Hepatocytes	CD8+ T cells	MIF	CD74_CD44	0.013697	0	MIF_CD74_CD44	MIF - (CD74+CD44)	MIF	Secreted Signaling	PMID: 29637711; PMID: 26175090
Macrophages	CD8+ T cells	MIF	CD74_CD44	0.0179736	0	MIF_CD74_CD44	MIF - (CD74+CD44)	MIF	Secreted Signaling	PMID: 29637711; PMID: 26175090
NK cells	CD8+ T cells	MIF	CD74_CD44	0.0364452	0	MIF_CD74_CD44	MIF - (CD74+CD44)	MIF	Secreted Signaling	PMID: 29637711; PMID: 26175090
B-cells	Macrophages	MIF	CD74_CD44	0.0281595	0	MIF_CD74_CD44	MIF - (CD74+CD44)	MIF	Secreted Signaling	PMID: 29637711; PMID: 26175090
CD8+ T cells	Macrophages	MIF	CD74_CD44	0.0239099	0	MIF_CD74_CD44	MIF - (CD74+CD44)	MIF	Secreted Signaling	PMID: 29637711; PMID: 26175090
Hepatocytes	Macrophages	MIF	CD74_CD44	0.0126808	0	MIF_CD74_CD44	MIF - (CD74+CD44)	MIF	Secreted Signaling	PMID: 29637711; PMID: 26175090
Macrophages	Macrophages	MIF	CD74_CD44	0.0166454	0	MIF_CD74_CD44	MIF - (CD74+CD44)	MIF	Secreted Signaling	PMID: 29637711; PMID: 26175090
NK cells	Macrophages	MIF	CD74_CD44	0.0337989	0	MIF_CD74_CD44	MIF - (CD74+CD44)	MIF	Secreted Signaling	PMID: 29637711; PMID: 26175090
B-cells	NK cells	MIF	CD74_CD44	0.0186679	0	MIF_CD74_CD44	MIF - (CD74+CD44)	MIF	Secreted Signaling	PMID: 29637711; PMID: 26175090
CD8+ T cells	NK cells	MIF	CD74_CD44	0.0158274	0	MIF_CD74_CD44	MIF - (CD74+CD44)	MIF	Secreted Signaling	PMID: 29637711; PMID: 26175090
Hepatocytes	NK cells	MIF	CD74_CD44	0.00836162	0	MIF_CD74_CD44	MIF - (CD74+CD44)	MIF	Secreted Signaling	PMID: 29637711; PMID: 26175090
Macrophages	NK cells	MIF	CD74_CD44	0.0109909	0	MIF_CD74_CD44	MIF - (CD74+CD44)	MIF	Secreted Signaling	PMID: 29637711; PMID: 26175090
NK cells	NK cells	MIF	CD74_CD44	0.0224504	0	MIF_CD74_CD44	MIF - (CD74+CD44)	MIF	Secreted Signaling	PMID: 29637711; PMID: 26175090
B-cells	CD8+ T cells	MIF	CD74_CXCR2	0.00546803	0	MIF_CD74_CXCR2	MIF - (CD74+CXCR2)	MIF	Secreted Signaling	PMID: 29637711; PMID: 26175090
CD8+ T cells	CD8+ T cells	MIF	CD74_CXCR2	0.00462653	0	MIF_CD74_CXCR2	MIF - (CD74+CXCR2)	MIF	Secreted Signaling	PMID: 29637711; PMID: 26175090
Hepatocytes	CD8+ T cells	MIF	CD74_CXCR2	0.00243115	0.02	MIF_CD74_CXCR2	MIF - (CD74+CXCR2)	MIF	Secreted Signaling	PMID: 29637711; PMID: 26175090
Macrophages	CD8+ T cells	MIF	CD74_CXCR2	0.00320164	0.01	MIF_CD74_CXCR2	MIF - (CD74+CXCR2)	MIF	Secreted Signaling	PMID: 29637711; PMID: 26175090
NK cells	CD8+ T cells	MIF	CD74_CXCR2	0.00659392	0	MIF_CD74_CXCR2	MIF - (CD74+CXCR2)	MIF	Secreted Signaling	PMID: 29637711; PMID: 26175090
B-cells	Hepatocytes	MIF	CD74_CXCR2	0.00257319	0	MIF_CD74_CXCR2	MIF - (CD74+CXCR2)	MIF	Secreted Signaling	PMID: 29637711; PMID: 26175090
CD8+ T cells	Hepatocytes	MIF	CD74_CXCR2	0.00217621	0.01	MIF_CD74_CXCR2	MIF - (CD74+CXCR2)	MIF	Secreted Signaling	PMID: 29637711; PMID: 26175090
NK cells	Hepatocytes	MIF	CD74_CXCR2	0.00310488	0.03	MIF_CD74_CXCR2	MIF - (CD74+CXCR2)	MIF	Secreted Signaling	PMID: 29637711; PMID: 26175090
B-cells	Macrophages	IL16	CD4	0.000585434	0	IL16_CD4	IL16 - CD4	IL16	Secreted Signaling	KEGG: hsa04060
CD8+ T cells	Macrophages	IL16	CD4	0.00065238	0	IL16_CD4	IL16 - CD4	IL16	Secreted Signaling	KEGG: hsa04060
NK cells	Macrophages	IL16	CD4	0.0001334	0	IL16_CD4	IL16 - CD4	IL16	Secreted Signaling	KEGG: hsa04060
CD8+ T cells	Macrophages	IFNG	IFNGR1_IFNGR2	0.000128846	0	IFNG_IFNGR1_IFNGR2	IFNG - (IFNGR1+IFNGR2)	IFN-II	Secreted Signaling	KEGG: hsa04060
NK cells	Macrophages	IFNG	IFNGR1_IFNGR2	0.000152757	0	IFNG_IFNGR1_IFNGR2	IFNG - (IFNGR1+IFNGR2)	IFN-II	Secreted Signaling	KEGG: hsa04060
Macrophages	B-cells	TNFSF13B	TNFRSF17	0.000576587	0	TNFSF13B_TNFRSF17	TNFSF13B - TNFRSF17	BAFF	Secreted Signaling	KEGG: hsa04060
Hepatocytes	B-cells	SPP1	CD44	0.000330455	0	SPP1_CD44	SPP1 - CD44	SPP1	Secreted Signaling	PMID: 21907263
Macrophages	B-cells	SPP1	CD44	0.00276988	0	SPP1_CD44	SPP1 - CD44	SPP1	Secreted Signaling	PMID: 21907263
NK cells	B-cells	SPP1	CD44	0.000313405	0	SPP1_CD44	SPP1 - CD44	SPP1	Secreted Signaling	PMID: 21907263
Hepatocytes	CD8+ T cells	SPP1	CD44	0.00160295	0	SPP1_CD44	SPP1 - CD44	SPP1	Secreted Signaling	PMID: 21907263
Macrophages	CD8+ T cells	SPP1	CD44	0.0133109	0	SPP1_CD44	SPP1 - CD44	SPP1	Secreted Signaling	PMID: 21907263
NK cells	CD8+ T cells	SPP1	CD44	0.00152035	0	SPP1_CD44	SPP1 - CD44	SPP1	Secreted Signaling	PMID: 21907263
Hepatocytes	Macrophages	SPP1	CD44	0.000867304	0	SPP1_CD44	SPP1 - CD44	SPP1	Secreted Signaling	PMID: 21907263
Macrophages	Macrophages	SPP1	CD44	0.00724106	0	SPP1_CD44	SPP1 - CD44	SPP1	Secreted Signaling	PMID: 21907263
NK cells	Macrophages	SPP1	CD44	0.000822577	0	SPP1_CD44	SPP1 - CD44	SPP1	Secreted Signaling	PMID: 21907263
Hepatocytes	NK cells	SPP1	CD44	0.000796573	0	SPP1_CD44	SPP1 - CD44	SPP1	Secreted Signaling	PMID: 21907263
Macrophages	NK cells	SPP1	CD44	0.00665399	0	SPP1_CD44	SPP1 - CD44	SPP1	Secreted Signaling	PMID: 21907263
NK cells	NK cells	SPP1	CD44	0.00075549	0.01	SPP1_CD44	SPP1 - CD44	SPP1	Secreted Signaling	PMID: 21907263
Hepatocytes	Hepatocytes	SPP1	ITGAV_ITGB1	0.000961823	0	SPP1_ITGAV_ITGB1	SPP1 - (ITGAV+ITGB1)	SPP1	Secreted Signaling	PMID: 21907263
Macrophages	Hepatocytes	SPP1	ITGAV_ITGB1	0.00802462	0	SPP1_ITGAV_ITGB1	SPP1 - (ITGAV+ITGB1)	SPP1	Secreted Signaling	PMID: 21907263
Macrophages	Macrophages	SPP1	ITGAV_ITGB1	0.00269177	0	SPP1_ITGAV_ITGB1	SPP1 - (ITGAV+ITGB1)	SPP1	Secreted Signaling	PMID: 21907263
Hepatocytes	Hepatocytes	SPP1	ITGAV_ITGB5	0.000297805	0	SPP1_ITGAV_ITGB5	SPP1 - (ITGAV+ITGB5)	SPP1	Secreted Signaling	PMID: 21907263
Macrophages	Hepatocytes	SPP1	ITGAV_ITGB5	0.00249682	0	SPP1_ITGAV_ITGB5	SPP1 - (ITGAV+ITGB5)	SPP1	Secreted Signaling	PMID: 21907263
Hepatocytes	B-cells	SPP1	ITGA4_ITGB1	0.00113519	0	SPP1_ITGA4_ITGB1	SPP1 - (ITGA4+ITGB1)	SPP1	Secreted Signaling	PMID: 21907263
Macrophages	B-cells	SPP1	ITGA4_ITGB1	0.00945901	0	SPP1_ITGA4_ITGB1	SPP1 - (ITGA4+ITGB1)	SPP1	Secreted Signaling	PMID: 21907263
NK cells	B-cells	SPP1	ITGA4_ITGB1	0.00107667	0	SPP1_ITGA4_ITGB1	SPP1 - (ITGA4+ITGB1)	SPP1	Secreted Signaling	PMID: 21907263
Hepatocytes	CD8+ T cells	SPP1	ITGA4_ITGB1	0.00165139	0	SPP1_ITGA4_ITGB1	SPP1 - (ITGA4+ITGB1)	SPP1	Secreted Signaling	PMID: 21907263
Macrophages	CD8+ T cells	SPP1	ITGA4_ITGB1	0.0137083	0	SPP1_ITGA4_ITGB1	SPP1 - (ITGA4+ITGB1)	SPP1	Secreted Signaling	PMID: 21907263
NK cells	CD8+ T cells	SPP1	ITGA4_ITGB1	0.00156629	0	SPP1_ITGA4_ITGB1	SPP1 - (ITGA4+ITGB1)	SPP1	Secreted Signaling	PMID: 21907263
Hepatocytes	Macrophages	SPP1	ITGA4_ITGB1	0.00098727	0	SPP1_ITGA4_ITGB1	SPP1 - (ITGA4+ITGB1)	SPP1	Secreted Signaling	PMID: 21907263
Macrophages	Macrophages	SPP1	ITGA4_ITGB1	0.00823539	0	SPP1_ITGA4_ITGB1	SPP1 - (ITGA4+ITGB1)	SPP1	Secreted Signaling	PMID: 21907263
NK cells	Macrophages	SPP1	ITGA4_ITGB1	0.000936362	0	SPP1_ITGA4_ITGB1	SPP1 - (ITGA4+ITGB1)	SPP1	Secreted Signaling	PMID: 21907263
Hepatocytes	NK cells	SPP1	ITGA4_ITGB1	0.00120553	0	SPP1_ITGA4_ITGB1	SPP1 - (ITGA4+ITGB1)	SPP1	Secreted Signaling	PMID: 21907263
Macrophages	NK cells	SPP1	ITGA4_ITGB1	0.0100399	0	SPP1_ITGA4_ITGB1	SPP1 - (ITGA4+ITGB1)	SPP1	Secreted Signaling	PMID: 21907263
NK cells	NK cells	SPP1	ITGA4_ITGB1	0.00114338	0.02	SPP1_ITGA4_ITGB1	SPP1 - (ITGA4+ITGB1)	SPP1	Secreted Signaling	PMID: 21907263
Macrophages	B-cells	SPP1	ITGA8_ITGB1	0.00227029	0	SPP1_ITGA8_ITGB1	SPP1 - (ITGA8+ITGB1)	SPP1	Secreted Signaling	PMID: 21907263
Macrophages	CD8+ T cells	SPP1	ITGA8_ITGB1	0.0019124	0	SPP1_ITGA8_ITGB1	SPP1 - (ITGA8+ITGB1)	SPP1	Secreted Signaling	PMID: 21907263
Hepatocytes	Hepatocytes	SPP1	ITGA5_ITGB1	0.000539696	0	SPP1_ITGA5_ITGB1	SPP1 - (ITGA5+ITGB1)	SPP1	Secreted Signaling	PMID: 21907263
Macrophages	Hepatocytes	SPP1	ITGA5_ITGB1	0.00451677	0	SPP1_ITGA5_ITGB1	SPP1 - (ITGA5+ITGB1)	SPP1	Secreted Signaling	PMID: 21907263
NK cells	Hepatocytes	SPP1	ITGA5_ITGB1	0.000511855	0	SPP1_ITGA5_ITGB1	SPP1 - (ITGA5+ITGB1)	SPP1	Secreted Signaling	PMID: 21907263
Macrophages	NK cells	SPP1	ITGA5_ITGB1	0.0032824	0	SPP1_ITGA5_ITGB1	SPP1 - (ITGA5+ITGB1)	SPP1	Secreted Signaling	PMID: 21907263
Hepatocytes	Hepatocytes	NAMPT	INSR	0.000834256	0	NAMPT_INSR	NAMPT - INSR	VISFATIN	Secreted Signaling	PMID: 28490838
Macrophages	Hepatocytes	NAMPT	INSR	0.00594963	0	NAMPT_INSR	NAMPT - INSR	VISFATIN	Secreted Signaling	PMID: 28490838
CD8+ T cells	Hepatocytes	NAMPT	ITGA5_ITGB1	7.99348e-05	0	NAMPT_ITGA5_ITGB1	NAMPT - (ITGA5+ITGB1)	VISFATIN	Secreted Signaling	PMID: 28490838
Hepatocytes	Hepatocytes	NAMPT	ITGA5_ITGB1	0.000277374	0	NAMPT_ITGA5_ITGB1	NAMPT - (ITGA5+ITGB1)	VISFATIN	Secreted Signaling	PMID: 28490838
Macrophages	Hepatocytes	NAMPT	ITGA5_ITGB1	0.00198492	0	NAMPT_ITGA5_ITGB1	NAMPT - (ITGA5+ITGB1)	VISFATIN	Secreted Signaling	PMID: 28490838
NK cells	Hepatocytes	NAMPT	ITGA5_ITGB1	0.000147088	0	NAMPT_ITGA5_ITGB1	NAMPT - (ITGA5+ITGB1)	VISFATIN	Secreted Signaling	PMID: 28490838
Macrophages	NK cells	NAMPT	ITGA5_ITGB1	0.00144147	0	NAMPT_ITGA5_ITGB1	NAMPT - (ITGA5+ITGB1)	VISFATIN	Secreted Signaling	PMID: 28490838
B-cells	Hepatocytes	ANGPT2	ITGA5_ITGB1	1.56013e-05	0	ANGPT2_ITGA5_ITGB1	ANGPT2 - (ITGA5+ITGB1)	ANGPT	Secreted Signaling	PMID: 20651738; PMID: 25635707
CD8+ T cells	Hepatocytes	ANGPT2	ITGA5_ITGB1	5.97867e-05	0	ANGPT2_ITGA5_ITGB1	ANGPT2 - (ITGA5+ITGB1)	ANGPT	Secreted Signaling	PMID: 20651738; PMID: 25635707
CD8+ T cells	NK cells	ANGPT2	ITGA5_ITGB1	4.33947e-05	0.03	ANGPT2_ITGA5_ITGB1	ANGPT2 - (ITGA5+ITGB1)	ANGPT	Secreted Signaling	PMID: 20651738; PMID: 25635707
Hepatocytes	B-cells	MDK	SDC1	0.00871085	0	MDK_SDC1	MDK - SDC1	MK	Secreted Signaling	PMID: 28356350
Hepatocytes	Hepatocytes	MDK	SDC1	0.00583678	0	MDK_SDC1	MDK - SDC1	MK	Secreted Signaling	PMID: 28356350
Hepatocytes	Hepatocytes	MDK	SDC2	0.00381283	0	MDK_SDC2	MDK - SDC2	MK	Secreted Signaling	PMID: 28356350
Hepatocytes	Hepatocytes	MDK	SDC4	0.000903014	0	MDK_SDC4	MDK - SDC4	MK	Secreted Signaling	PMID: 28356350
Hepatocytes	B-cells	MDK	ITGA4_ITGB1	0.00180786	0	MDK_ITGA4_ITGB1	MDK - (ITGA4+ITGB1)	MK	Secreted Signaling	PMID: 28356350
Macrophages	B-cells	MDK	ITGA4_ITGB1	0.000492452	0	MDK_ITGA4_ITGB1	MDK - (ITGA4+ITGB1)	MK	Secreted Signaling	PMID: 28356350
NK cells	B-cells	MDK	ITGA4_ITGB1	0.000659024	0.01	MDK_ITGA4_ITGB1	MDK - (ITGA4+ITGB1)	MK	Secreted Signaling	PMID: 28356350
Hepatocytes	CD8+ T cells	MDK	ITGA4_ITGB1	0.00262913	0	MDK_ITGA4_ITGB1	MDK - (ITGA4+ITGB1)	MK	Secreted Signaling	PMID: 28356350
Macrophages	CD8+ T cells	MDK	ITGA4_ITGB1	0.000716591	0	MDK_ITGA4_ITGB1	MDK - (ITGA4+ITGB1)	MK	Secreted Signaling	PMID: 28356350
NK cells	CD8+ T cells	MDK	ITGA4_ITGB1	0.000958906	0	MDK_ITGA4_ITGB1	MDK - (ITGA4+ITGB1)	MK	Secreted Signaling	PMID: 28356350
Hepatocytes	Macrophages	MDK	ITGA4_ITGB1	0.00157242	0	MDK_ITGA4_ITGB1	MDK - (ITGA4+ITGB1)	MK	Secreted Signaling	PMID: 28356350
Macrophages	Macrophages	MDK	ITGA4_ITGB1	0.000428247	0	MDK_ITGA4_ITGB1	MDK - (ITGA4+ITGB1)	MK	Secreted Signaling	PMID: 28356350
NK cells	Macrophages	MDK	ITGA4_ITGB1	0.000573114	0	MDK_ITGA4_ITGB1	MDK - (ITGA4+ITGB1)	MK	Secreted Signaling	PMID: 28356350
Hepatocytes	NK cells	MDK	ITGA4_ITGB1	0.00191979	0	MDK_ITGA4_ITGB1	MDK - (ITGA4+ITGB1)	MK	Secreted Signaling	PMID: 28356350
Macrophages	NK cells	MDK	ITGA4_ITGB1	0.000522984	0.04	MDK_ITGA4_ITGB1	MDK - (ITGA4+ITGB1)	MK	Secreted Signaling	PMID: 28356350
NK cells	NK cells	MDK	ITGA4_ITGB1	0.000699876	0.02	MDK_ITGA4_ITGB1	MDK - (ITGA4+ITGB1)	MK	Secreted Signaling	PMID: 28356350
Hepatocytes	Hepatocytes	MDK	ITGA6_ITGB1	0.00193078	0	MDK_ITGA6_ITGB1	MDK - (ITGA6+ITGB1)	MK	Secreted Signaling	PMID: 28356350
Hepatocytes	Hepatocytes	MDK	LRP1	0.00198199	0	MDK_LRP1	MDK - LRP1	MK	Secreted Signaling	PMID: 28356350
Hepatocytes	Macrophages	MDK	LRP1	0.00237124	0	MDK_LRP1	MDK - LRP1	MK	Secreted Signaling	PMID: 28356350
Hepatocytes	B-cells	MDK	NCL	0.0102022	0	MDK_NCL	MDK - NCL	MK	Secreted Signaling	PMID: 28356350
Hepatocytes	CD8+ T cells	MDK	NCL	0.0116449	0	MDK_NCL	MDK - NCL	MK	Secreted Signaling	PMID: 28356350
Hepatocytes	Hepatocytes	MDK	NCL	0.00700702	0	MDK_NCL	MDK - NCL	MK	Secreted Signaling	PMID: 28356350
Hepatocytes	Macrophages	MDK	NCL	0.0134328	0	MDK_NCL	MDK - NCL	MK	Secreted Signaling	PMID: 28356350
Hepatocytes	NK cells	MDK	NCL	0.0150821	0	MDK_NCL	MDK - NCL	MK	Secreted Signaling	PMID: 28356350
B-cells	Macrophages	C3	ITGAX_ITGB2	0.00160713	0	C3_ITGAX_ITGB2	C3 - (ITGAX+ITGB2)	COMPLEMENT	Secreted Signaling	PMID: 16234578
CD8+ T cells	Macrophages	C3	ITGAX_ITGB2	0.00281726	0	C3_ITGAX_ITGB2	C3 - (ITGAX+ITGB2)	COMPLEMENT	Secreted Signaling	PMID: 16234578
Hepatocytes	Macrophages	C3	ITGAX_ITGB2	0.0326661	0	C3_ITGAX_ITGB2	C3 - (ITGAX+ITGB2)	COMPLEMENT	Secreted Signaling	PMID: 16234578
Macrophages	Macrophages	C3	ITGAX_ITGB2	0.00832816	0	C3_ITGAX_ITGB2	C3 - (ITGAX+ITGB2)	COMPLEMENT	Secreted Signaling	PMID: 16234578
NK cells	Macrophages	C3	ITGAX_ITGB2	0.0123488	0	C3_ITGAX_ITGB2	C3 - (ITGAX+ITGB2)	COMPLEMENT	Secreted Signaling	PMID: 16234578
Hepatocytes	Macrophages	C5	C5AR1	0.000826051	0	HC_C5AR1	HC - C5AR1	COMPLEMENT	Secreted Signaling	KEGG: hsa04080
Macrophages	Macrophages	C5	C5AR1	1.51285e-05	0	HC_C5AR1	HC - C5AR1	COMPLEMENT	Secreted Signaling	KEGG: hsa04080
NK cells	Macrophages	C5	C5AR1	7.1361e-05	0	HC_C5AR1	HC - C5AR1	COMPLEMENT	Secreted Signaling	KEGG: hsa04080
Hepatocytes	B-cells	F2	F2R	0.00276914	0	F2_F2R	F2 - F2R	PARs	Secreted Signaling	KEGG: hsa04080
Hepatocytes	CD8+ T cells	F2	F2R	0.00633883	0	F2_F2R	F2 - F2R	PARs	Secreted Signaling	KEGG: hsa04080
NK cells	CD8+ T cells	F2	F2R	0.00200492	0.03	F2_F2R	F2 - F2R	PARs	Secreted Signaling	KEGG: hsa04080
Hepatocytes	Hepatocytes	F2	F2R	0.00117721	0	F2_F2R	F2 - F2R	PARs	Secreted Signaling	KEGG: hsa04080
Hepatocytes	Macrophages	F2	F2R	0.00147813	0.01	F2_F2R	F2 - F2R	PARs	Secreted Signaling	KEGG: hsa04080
Hepatocytes	B-cells	PLG	F2R	0.0031464	0	PLG_F2R	PLG - F2RL3	PARs	Secreted Signaling	KEGG: hsa04080
Hepatocytes	CD8+ T cells	PLG	F2R	0.00719891	0	PLG_F2R	PLG - F2RL3	PARs	Secreted Signaling	KEGG: hsa04080
Hepatocytes	Hepatocytes	PLG	F2R	0.00133788	0	PLG_F2R	PLG - F2RL3	PARs	Secreted Signaling	KEGG: hsa04080
Hepatocytes	Macrophages	PLG	F2R	0.00167981	0.01	PLG_F2R	PLG - F2RL3	PARs	Secreted Signaling	KEGG: hsa04080
B-cells	B-cells	GZMA	F2R	5.68686e-05	0	GZMA_F2R	GZMA - F2R	PARs	Secreted Signaling	KEGG: hsa04080
CD8+ T cells	B-cells	GZMA	F2R	0.00112446	0	GZMA_F2R	GZMA - F2R	PARs	Secreted Signaling	KEGG: hsa04080
NK cells	B-cells	GZMA	F2R	0.00322138	0	GZMA_F2R	GZMA - F2R	PARs	Secreted Signaling	KEGG: hsa04080
B-cells	CD8+ T cells	GZMA	F2R	0.000130636	0	GZMA_F2R	GZMA - F2R	PARs	Secreted Signaling	KEGG: hsa04080
CD8+ T cells	CD8+ T cells	GZMA	F2R	0.00257947	0	GZMA_F2R	GZMA - F2R	PARs	Secreted Signaling	KEGG: hsa04080
NK cells	CD8+ T cells	GZMA	F2R	0.00736974	0	GZMA_F2R	GZMA - F2R	PARs	Secreted Signaling	KEGG: hsa04080
B-cells	Hepatocytes	GZMA	F2R	2.41381e-05	0	GZMA_F2R	GZMA - F2R	PARs	Secreted Signaling	KEGG: hsa04080
CD8+ T cells	Hepatocytes	GZMA	F2R	0.000477573	0	GZMA_F2R	GZMA - F2R	PARs	Secreted Signaling	KEGG: hsa04080
NK cells	Hepatocytes	GZMA	F2R	0.00136982	0	GZMA_F2R	GZMA - F2R	PARs	Secreted Signaling	KEGG: hsa04080
B-cells	Macrophages	GZMA	F2R	3.03173e-05	0	GZMA_F2R	GZMA - F2R	PARs	Secreted Signaling	KEGG: hsa04080
CD8+ T cells	Macrophages	GZMA	F2R	0.000599759	0	GZMA_F2R	GZMA - F2R	PARs	Secreted Signaling	KEGG: hsa04080
NK cells	Macrophages	GZMA	F2R	0.00171989	0	GZMA_F2R	GZMA - F2R	PARs	Secreted Signaling	KEGG: hsa04080
Hepatocytes	Hepatocytes	F2	F2RL3	0.000424602	0	F2_F2RL3	F2 - F2RL3	PARs	Secreted Signaling	KEGG: hsa04080
B-cells	B-cells	GZMA	F2RL3	9.86715e-06	0	GZMA_F2RL3	GZMA - F2RL3	PARs	Secreted Signaling	KEGG: hsa04080
CD8+ T cells	B-cells	GZMA	F2RL3	0.000195274	0	GZMA_F2RL3	GZMA - F2RL3	PARs	Secreted Signaling	KEGG: hsa04080
NK cells	B-cells	GZMA	F2RL3	0.000560401	0	GZMA_F2RL3	GZMA - F2RL3	PARs	Secreted Signaling	KEGG: hsa04080
B-cells	CD8+ T cells	GZMA	F2RL3	6.85635e-06	0	GZMA_F2RL3	GZMA - F2RL3	PARs	Secreted Signaling	KEGG: hsa04080
CD8+ T cells	CD8+ T cells	GZMA	F2RL3	0.000135697	0	GZMA_F2RL3	GZMA - F2RL3	PARs	Secreted Signaling	KEGG: hsa04080
NK cells	CD8+ T cells	GZMA	F2RL3	0.000389469	0	GZMA_F2RL3	GZMA - F2RL3	PARs	Secreted Signaling	KEGG: hsa04080
B-cells	Hepatocytes	GZMA	F2RL3	8.69982e-06	0	GZMA_F2RL3	GZMA - F2RL3	PARs	Secreted Signaling	KEGG: hsa04080
CD8+ T cells	Hepatocytes	GZMA	F2RL3	0.000172176	0	GZMA_F2RL3	GZMA - F2RL3	PARs	Secreted Signaling	KEGG: hsa04080
NK cells	Hepatocytes	GZMA	F2RL3	0.000494135	0	GZMA_F2RL3	GZMA - F2RL3	PARs	Secreted Signaling	KEGG: hsa04080
Hepatocytes	Hepatocytes	PLG	F2RL3	0.000482603	0	PLG_F2RL3	PLG - F2RL3	PARs	Secreted Signaling	KEGG: hsa04080
Hepatocytes	Hepatocytes	F2	PARD3	0.00199755	0	F2_PARD3	F2 - PARD3	PARs	Secreted Signaling	KEGG: hsa04080
NK cells	Hepatocytes	F2	PARD3	0.000629927	0.02	F2_PARD3	F2 - PARD3	PARs	Secreted Signaling	KEGG: hsa04080
B-cells	Hepatocytes	GZMA	PARD3	4.09916e-05	0	GZMA_PARD3	GZMA - PARD3	PARs	Secreted Signaling	KEGG: hsa04080
CD8+ T cells	Hepatocytes	GZMA	PARD3	0.000810765	0	GZMA_PARD3	GZMA - PARD3	PARs	Secreted Signaling	KEGG: hsa04080
NK cells	Hepatocytes	GZMA	PARD3	0.00232407	0	GZMA_PARD3	GZMA - PARD3	PARs	Secreted Signaling	KEGG: hsa04080
Hepatocytes	Hepatocytes	PLG	PARD3	0.00226993	0	PLG_PARD3	PLG - PARD3	PARs	Secreted Signaling	KEGG: hsa04080
Hepatocytes	Macrophages	SEMA3E	PLXND1	2.03157e-05	0	SEMA3E_PLXND1	SEMA3E - PLXND1	SEMA3	Secreted Signaling	PMID: 22325954
Macrophages	B-cells	LGALS9	PTPRC	0.00352797	0	LGALS9_CD45	LGALS9 - CD45	GALECTIN	Secreted Signaling	PMID: 30120235
Macrophages	CD8+ T cells	LGALS9	PTPRC	0.0147765	0	LGALS9_CD45	LGALS9 - CD45	GALECTIN	Secreted Signaling	PMID: 30120235
Macrophages	Macrophages	LGALS9	PTPRC	0.00439689	0	LGALS9_CD45	LGALS9 - CD45	GALECTIN	Secreted Signaling	PMID: 30120235
Macrophages	NK cells	LGALS9	PTPRC	0.0185077	0	LGALS9_CD45	LGALS9 - CD45	GALECTIN	Secreted Signaling	PMID: 30120235
CD8+ T cells	Macrophages	RARRES2	CMKLR1	0.000224784	0	RARRES2_CMKLR1	RARRES2 - CMKLR1	CHEMERIN	Secreted Signaling	PMID: 24671882
Hepatocytes	Macrophages	RARRES2	CMKLR1	0.0159949	0	RARRES2_CMKLR1	RARRES2 - CMKLR1	CHEMERIN	Secreted Signaling	PMID: 24671882
Macrophages	Macrophages	RARRES2	CMKLR1	0.00560779	0	RARRES2_CMKLR1	RARRES2 - CMKLR1	CHEMERIN	Secreted Signaling	PMID: 24671882
NK cells	Macrophages	RARRES2	CMKLR1	0.00365002	0	RARRES2_CMKLR1	RARRES2 - CMKLR1	CHEMERIN	Secreted Signaling	PMID: 24671882
Macrophages	B-cells	LGALS9	CD44	0.000532554	0	LGALS9_CD44	LGALS9 - CD44	GALECTIN	Secreted Signaling	PMID: 25065622
Macrophages	CD8+ T cells	LGALS9	CD44	0.00258128	0	LGALS9_CD44	LGALS9 - CD44	GALECTIN	Secreted Signaling	PMID: 25065622
Macrophages	Macrophages	LGALS9	CD44	0.00139727	0	LGALS9_CD44	LGALS9 - CD44	GALECTIN	Secreted Signaling	PMID: 25065622
Macrophages	NK cells	LGALS9	CD44	0.00128337	0	LGALS9_CD44	LGALS9 - CD44	GALECTIN	Secreted Signaling	PMID: 25065622
